# Supplementary material
Source: publisher figshare collection journal article supplement (https://acs.figshare.com/ndownloader/files/3703045)
Supplement: Supplementary file 1 [file 3703045]

# Supporting Information

## Discovery of Novel Adenosine Receptor Agonists that Exhibit Subtype Selectivity

Anthony Knight,<sup>†</sup> Jennifer L. Hemmings,<sup>‡</sup> Ian Winfield,<sup>¶,⊥</sup> Michele Leuenberger,<sup>‡</sup> Eugenia Frattini,<sup>⊥</sup>  
Bruno G. Frenguelli,<sup>§</sup> Simon J. Dowell,<sup>||</sup> Martin Lochner,<sup>\*,‡</sup> and Graham Ladds<sup>\*,⊥</sup>

<sup>†</sup>*Systems Biology Doctoral Training Centre, University of Warwick, Coventry, CV4 7AL, UK.*

<sup>‡</sup>*Department of Chemistry and Biochemistry, University of Bern, 3012 Bern, Switzerland.*

<sup>¶</sup>*Division of Biomedical Cell Biology, Warwick Medical School, University of Warwick, Coventry, CV4 7AL, UK.*

<sup>§</sup>*School of Life Sciences, University of Warwick, Coventry CV4 7AL, UK.*

<sup>||</sup>*Departments of Biological Research and Assay Development, GlaxoSmithKline, Hertfordshire, SG1 2NY, UK.*

<sup>⊥</sup>*Department of Pharmacology, University of Cambridge, Tennis Court Road, Cambridge CB2 1PD, UK.*

---

### Table of Contents

|       |                                                                                     |          |
|-------|-------------------------------------------------------------------------------------|----------|
| I.    | Synthesis of intermediates .....                                                    | S1 – S3  |
| II.   | <sup>1</sup> H and <sup>13</sup> C NMR spectra for compounds .....                  | S4 – S61 |
| III.  | Degree of purity for tested compounds.....                                          | S62      |
| IV.   | A <sub>3</sub> R in yeast .....                                                     | S63      |
| V.    | Schild plot analysis for compounds <b>36</b> and <b>37</b> .....                    | S64      |
| VI.   | Predicted binding poses for compounds <b>5-7</b> , <b>17-21</b> and <b>34</b> ..... | S65      |
| VII.  | PSI-Coffee sequence alignment for A <sub>1</sub> R homology modelling.....          | S66      |
| VIII. | Supplementary references .....                                                      | S66      |

---

### I. Synthesis of intermediates

#### 5'-(2-Fluorophenylthio)-5'-deoxy-2',3'-O-isopropylideneinosine (**28**).

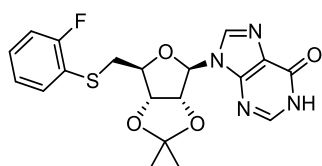

2-Fluorothiophenol (0.86 mL, 8.06 mmol) was added to anhydrous DMF (25 mL). Sodium hydride (60% oil dispersion, 0.26 g, 6.51 mmol) was added in portions at 0 °C and stirred for 3 h at room temperature. Chloride **27** (0.56 g, 1.71 mmol) was added in anhydrous DMF (10 mL) and stirred overnight. The solvent was removed *in vacuo* and the resultant residue was dissolved in DCM (20 mL). The organic phase was washed with water (2 x 50 mL), dried over anhydrous Na<sub>2</sub>SO<sub>4</sub> and the solvent was removed *in vacuo*. The crude product was purified by column chromatography (methanol/DCM, 1–2%) to give **28** (0.34 g, 48% yield) as a white solid. <sup>1</sup>H NMR (300 MHz, DMSO-*d*<sub>6</sub>) δ 12.43 (1H, br s, NH), 8.26 (1H, s, adenine H), 8.08 (1H, s, adenine H), 7.42 (1H, td, *J* 7.8, 1.7, Ar H), 7.31-7.10 (3H, m, 3 x Ar H), 6.14 (1H, d, *J* 2.3, 1'-H), 5.41 (1H, dd, *J* 6.1, 2.3, 2'-H), 5.0 (1H, dd, *J* 6.1, 2.8, 3'-H), 4.18 (1H, td, *J* 7.1, 2.8, 4'-H), 3.26 (2H, d, *J* 7.1, 5'-H<sub>2</sub>), 1.48 (3H, s, CH<sub>3</sub>), 1.30 (3H, s, CH<sub>3</sub>); <sup>13</sup>C NMR (100 MHz, DMSO-*d*<sub>6</sub>) δ 161.4, 158.9, 156.5, 147.6, 146.1, 139.1, 131.1, 128.6 (d, *J* 7.9), 125.0 (d, *J* 3.5), 124.7, 121.7 (d, *J* 17.2), 115.6 (d, *J* 21.9), 113.4, 89.3, 85.0, 83.5, 83.2, 34.3, 26.8, 25.1 (there is an additional quaternary aromatic peak in the <sup>13</sup>C NMR spectrum); <sup>19</sup>F NMR (376 MHz, DMSO-*d*<sub>6</sub>) δ -110.4; HRMS calculated for C<sub>19</sub>H<sub>20</sub>O<sub>4</sub>N<sub>4</sub>FS [MH]<sup>+</sup> 419.1184, found 419.1188.

### 6-Chloro-6-deoxy-5'-(2-fluorophenylthio)-2',3'-O-isopropylidene-5'-deoxyinosine (**29**).

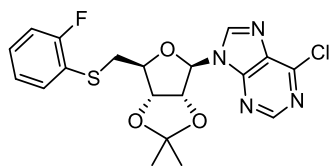

Intermediate **28** (0.12 g, 0.29 mmol) was dissolved in anhydrous DCM (10 mL). Anhydrous DMF (0.06 mL, 0.72 mmol) and thionyl chloride (0.11 mL, 1.44 mmol) were added and the reaction mixture was refluxed at 50 °C for 5 h. The solution was allowed to cool to room temperature, diluted with DCM (100 mL) and washed thoroughly with saturated sodium hydrogen carbonate solution (2 x 50 mL), brine (2 x 50 mL) and water (3 x 100 mL). The organic layer was dried over anhydrous Na<sub>2</sub>SO<sub>4</sub> and the solvent was removed *in vacuo*. The crude product was purified by column chromatography (methanol/DCM, 1–2%) to give chloride **29** (0.11, 88% yield) as a yellow oil. <sup>1</sup>H NMR (300 MHz, DMSO-*d*<sub>6</sub>) δ 8.84 (1H, s, adenine H), 8.81 (1H, s, adenine H), 7.38 (1H, td, *J* 7.7, 1.9, Ar H), 7.27–7.05 (3H, m, 3 x Ar H), 6.31 (1H, d, *J* 2.0, 1'-H), 5.56 (1H, dd, *J* 6.3, 2.0, 2'-H), 5.07 (1H, dd, *J* 6.3, 2.6, 3'-H), 4.28 (1H, td, *J* 7.1, 2.6, 4'-H), 3.26 (2H, d, *J* 7.1, 5'-H<sub>2</sub>), 1.50 (3H, s, CH<sub>3</sub>), 1.32 (3H, s, CH<sub>3</sub>); <sup>13</sup>C NMR (100 MHz, DMSO-*d*<sub>6</sub>) δ 161.4, 159.0, 151.7, 151.0, 149.4, 146.2, 131.5, 131.3, 128.7 (d, *J* 8.0), 124.8 (d, *J* 3.6), 121.6, (d, *J* 17.2), 115.5 (d, *J* 22.0), 113.3, 90.1, 85.7, 83.3, 83.2, 34.3, 26.8, 25.1 (there is an additional quaternary aromatic peak in the <sup>13</sup>C NMR); <sup>19</sup>F NMR (376 MHz, DMSO-*d*<sub>6</sub>) δ -110.3; HRMS (ESI) calculated for C<sub>19</sub>H<sub>19</sub>O<sub>3</sub>N<sub>4</sub>ClFS [MH]<sup>+</sup> 437.0845, found 437.0847.

### 3-Amino-1-adamantanol<sup>S1</sup>

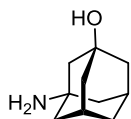

Sulfuric acid (97%, 10.3 mL) was cooled to 0 °C and nitric acid (65%, 1 mL) was added dropwise and stirred for 5 min. Amantadine hydrochloride (1 g, 5.33 mmol) was added in small portions and stirred for 2 h at 0 °C and then overnight at room temperature. The reaction mixture was again cooled to 0 °C and ice water was added slowly and stirred for 30 min. Sodium hydroxide (3M aq. solution, 250 mL) was then added until the pH was alkaline. The reaction mixture was extracted with DCM (3 x 100 mL), dried over anhydrous Na<sub>2</sub>SO<sub>4</sub> and concentrated *in vacuo* to give 3-amino-1-adamantanol (0.64 g, 72% yield) as a white solid. <sup>1</sup>H NMR (300 MHz, DMSO-*d*<sub>6</sub>) δ 4.34 (1H, s, OH), 2.08 (2H, m, 2 x adamantyl H), 1.46–1.24 (14H, m, 12 x adamantyl H and NH<sub>2</sub>); <sup>13</sup>C NMR (75 MHz, DMSO-*d*<sub>6</sub>) δ 67.8, 54.0, 49.8, 44.9, 44.2, 34.9, 30.5; *m/z* (ESI<sup>+</sup>) 168 (MH)<sup>+</sup>.

### (1*R*, 2*R*)-2-Benzoyloxycyclopentyl-(*tert*-butoxycarbonyl)amine<sup>S2</sup>

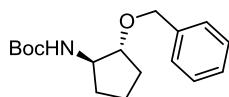

(1*R*,2*R*)-1-Amino-2-benzoyloxycyclopentane (0.2 mL, 1.05 mmol) was dissolved in anhydrous THF (10 mL) and cooled to 0 °C. Triethylamine (0.29 mL, 2.10 mmol) and Boc<sub>2</sub>O (0.25 g, 1.16 mmol) were then added and stirred at room temperature overnight. Ethyl acetate (100 mL) was then added and the organic phase was washed with water (2 x 50 mL) and brine (50 mL) and dried over anhydrous Na<sub>2</sub>SO<sub>4</sub>. The solvent was removed *in vacuo* to give a pale yellow solid, which was purified with column chromatography (methanol/DCM, 1%) to give the title compound (0.25 g, 84%) as a pale yellow solid. <sup>1</sup>H NMR (300 MHz, DMSO-*d*<sub>6</sub>) δ 7.39–7.22 (5H, m, 5 x phenyl H), 6.91 (1H, d, *J* 7.3, NH), 4.51 (2H, m, CH<sub>2</sub>Ph), 3.82–3.66 (2H, m, 1- and 2-H), 1.98–1.73 (2H, m, 2 x cyclopentyl H), 1.68–1.50 (3H, m, 3 x cyclopentyl H), 1.47–1.32 (10H, m, -(CH<sub>3</sub>)<sub>3</sub> and 1 x cyclopentyl H); <sup>13</sup>C NMR (100 MHz, DMSO-*d*<sub>6</sub>) δ 154.9, 138.9, 128.1, 127.3, 127.1, 84.5, 77.5, 69.8, 56.4, 30.1, 28.2, 21.3; *m/z* (ES<sup>+</sup>) 314 (MNa)<sup>+</sup>.

### (1*R*,2*R*)-2-(*tert*-Butoxycarbonylamino)cyclopentanol<sup>S3</sup>

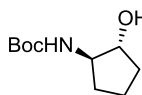

Fully protected cyclopentanol from above (0.25 g, 0.86 mmol) was dissolved in ethanol (20 mL). Pd(OH)<sub>2</sub>/C (20 wt. %, 0.06 g) and cyclohexene (0.52 mL, 5.16 mmol) were then added and refluxed for 4 hours. The reaction mixture was allowed to cool to room temperature and filtered through celite. The solvent was removed *in vacuo* and the crude product was purified by column chromatography (ethyl acetate/hexane, 50%) to give the title compound (0.20 g, 99% yield) as a white solid. <sup>1</sup>H NMR (300 MHz, DMSO-*d*<sub>6</sub>) δ 7.54 (1H, m, NH), 5.42 (1H, d, *J* 4.3, OH), 4.60 (1H, m, 1-H), 4.32 (1H, m, 2-H), 2.76–2.51 (2H, m, 2 x cyclopentyl H), 2.45–2.31 (2H, m, 2 x cyclopentyl H), 2.28–2.08 (11H, m, 2 x cyclopentyl H and -(CH<sub>3</sub>)<sub>3</sub>); <sup>13</sup>C NMR (100 MHz, DMSO-*d*<sub>6</sub>) δ 155.2, 77.3, 32.0, 28.3, 20.3; *m/z* (ES<sup>+</sup>) 224 (MNa)<sup>+</sup>.

**(1*R*,2*R*)-2-Aminocyclopentanol hydrochloride**<sup>S4</sup>

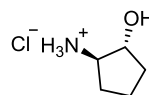

The Boc-protected cyclopentanol from above (0.023 g, 0.11 mmol) was dissolved in 4M HCl in dioxane (0.51 mL, 2.01 mmol) and stirred at room temperature for 1.5 h. The solvent was removed *in vacuo* and the resultant solid was washed with diethyl ether to give the title compound (0.01 g, 99% yield) as a white solid as the HCl salt. <sup>1</sup>H NMR (300 MHz, DMSO-*d*<sub>6</sub>)  $\delta$  7.99 (2H, br s, NH<sub>2</sub>), 5.18 (1H, d, *J* 4.6, OH), 3.96 (1H, m, 1-H), 3.13 (1H, m, 2-H), 2.07-1.83 (2H, m, 2 x cyclopentyl H), 1.72-1.60 (2H, m, 2 x cyclopentyl H), 1.56-1.44 (2H, m, 2 x cyclopentyl H); <sup>13</sup>C NMR (100 MHz, DMSO-*d*<sub>6</sub>)  $\delta$  74.6, 57.9, 32.0, 27.6, 20.1; *m/z* (ES<sup>+</sup>) 102 (MH)<sup>+</sup>.

## II. $^1\text{H}$ and $^{13}\text{C}$ NMR spectra for compounds

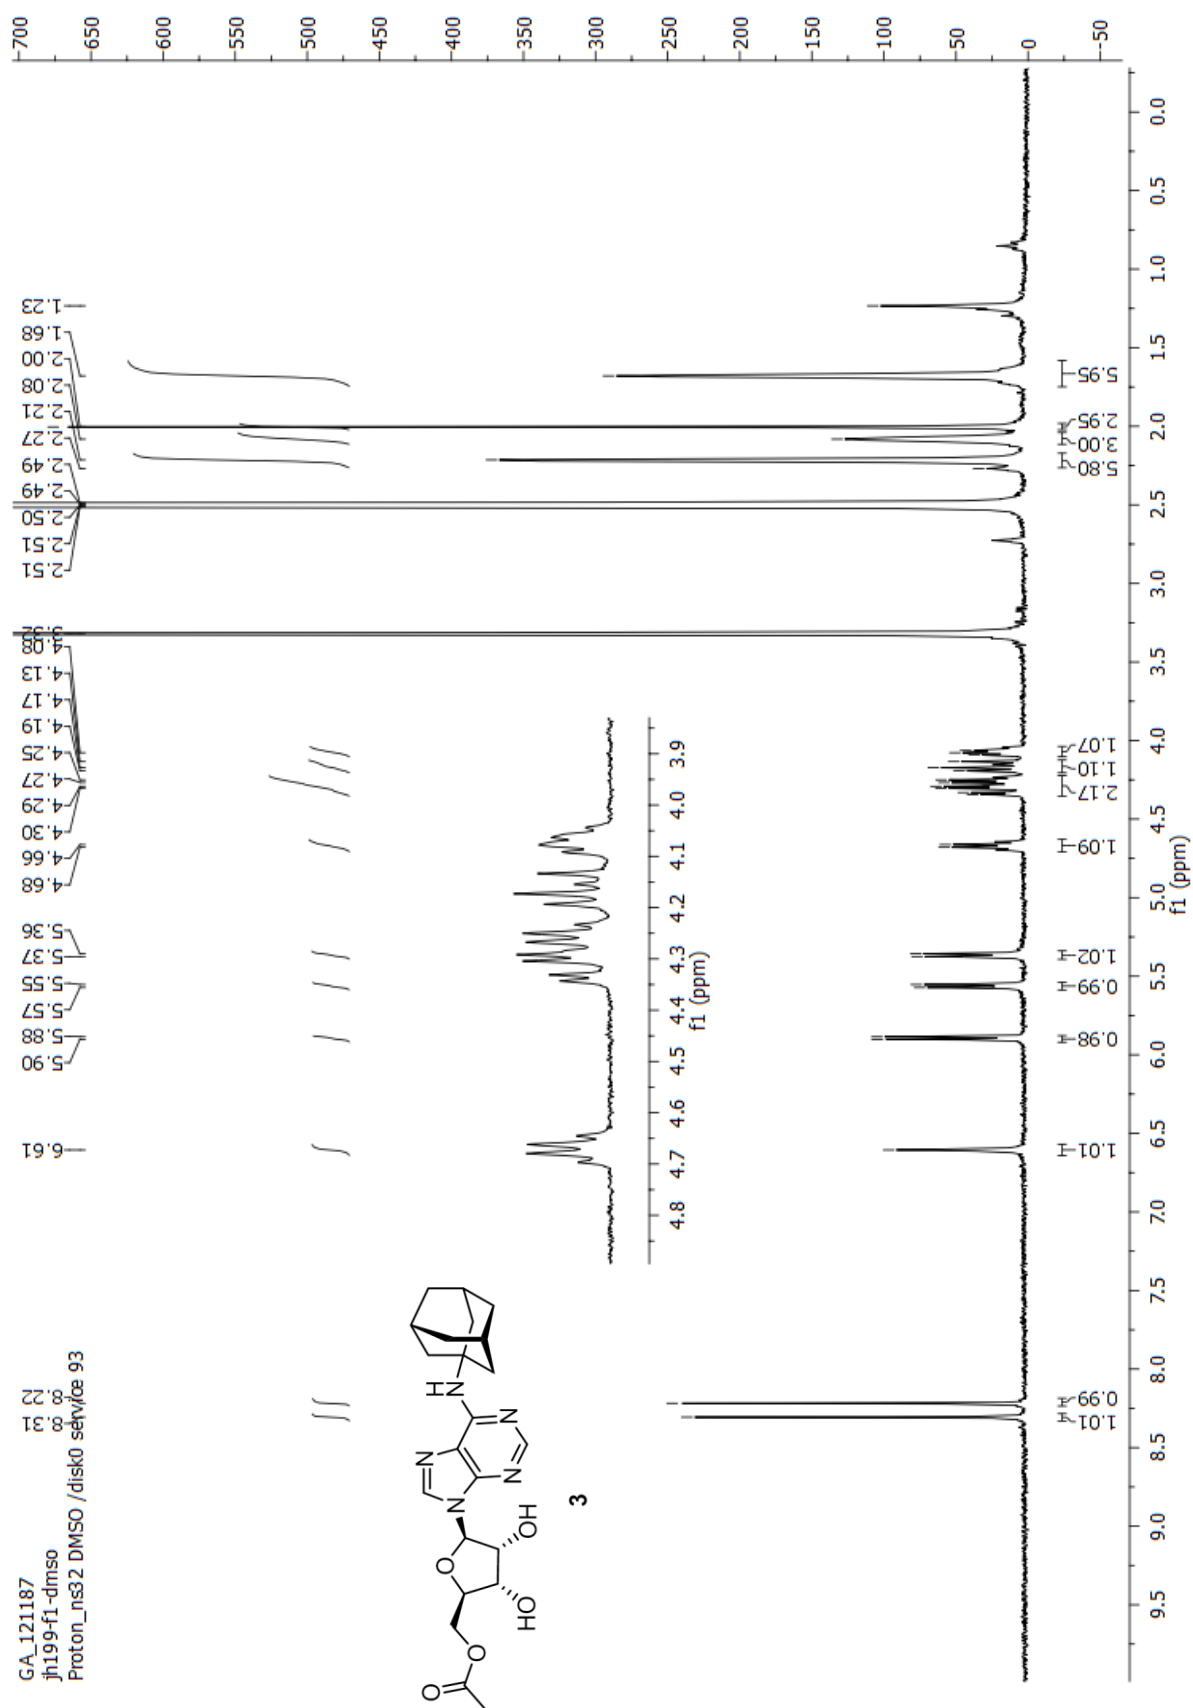

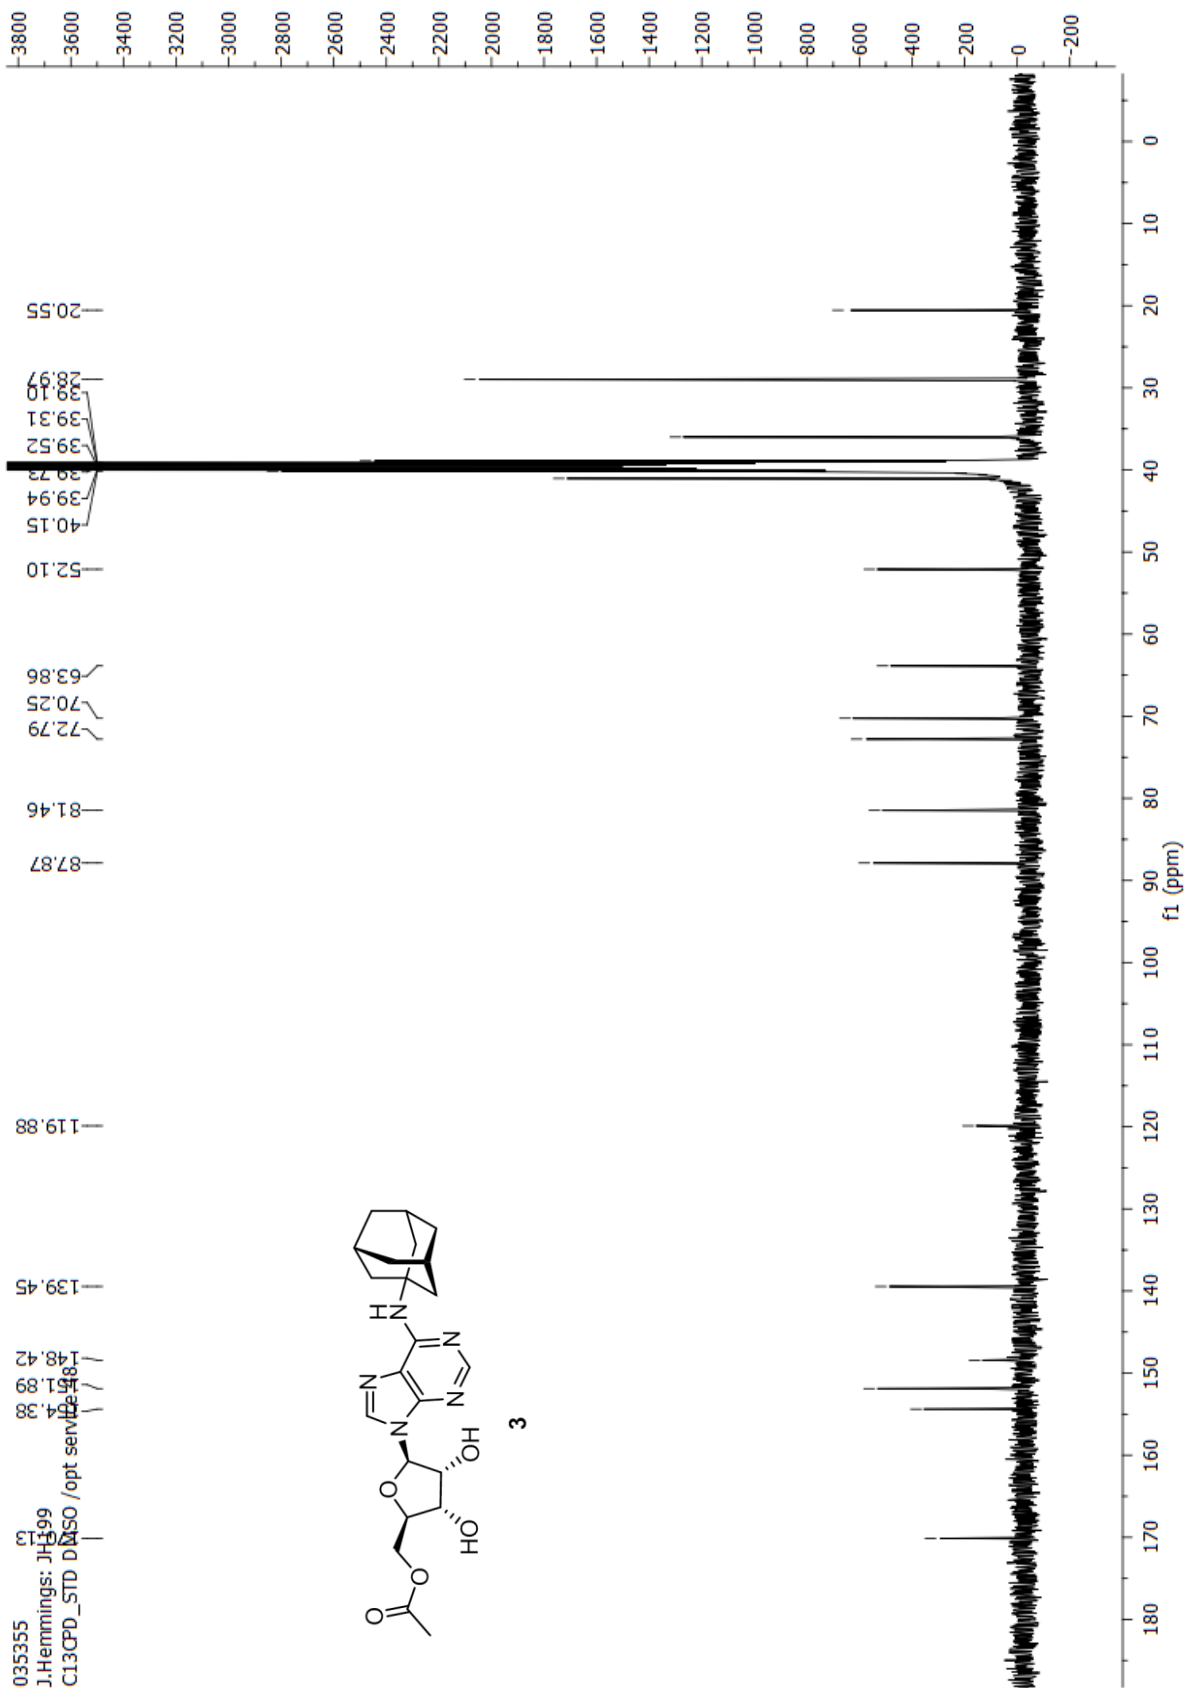

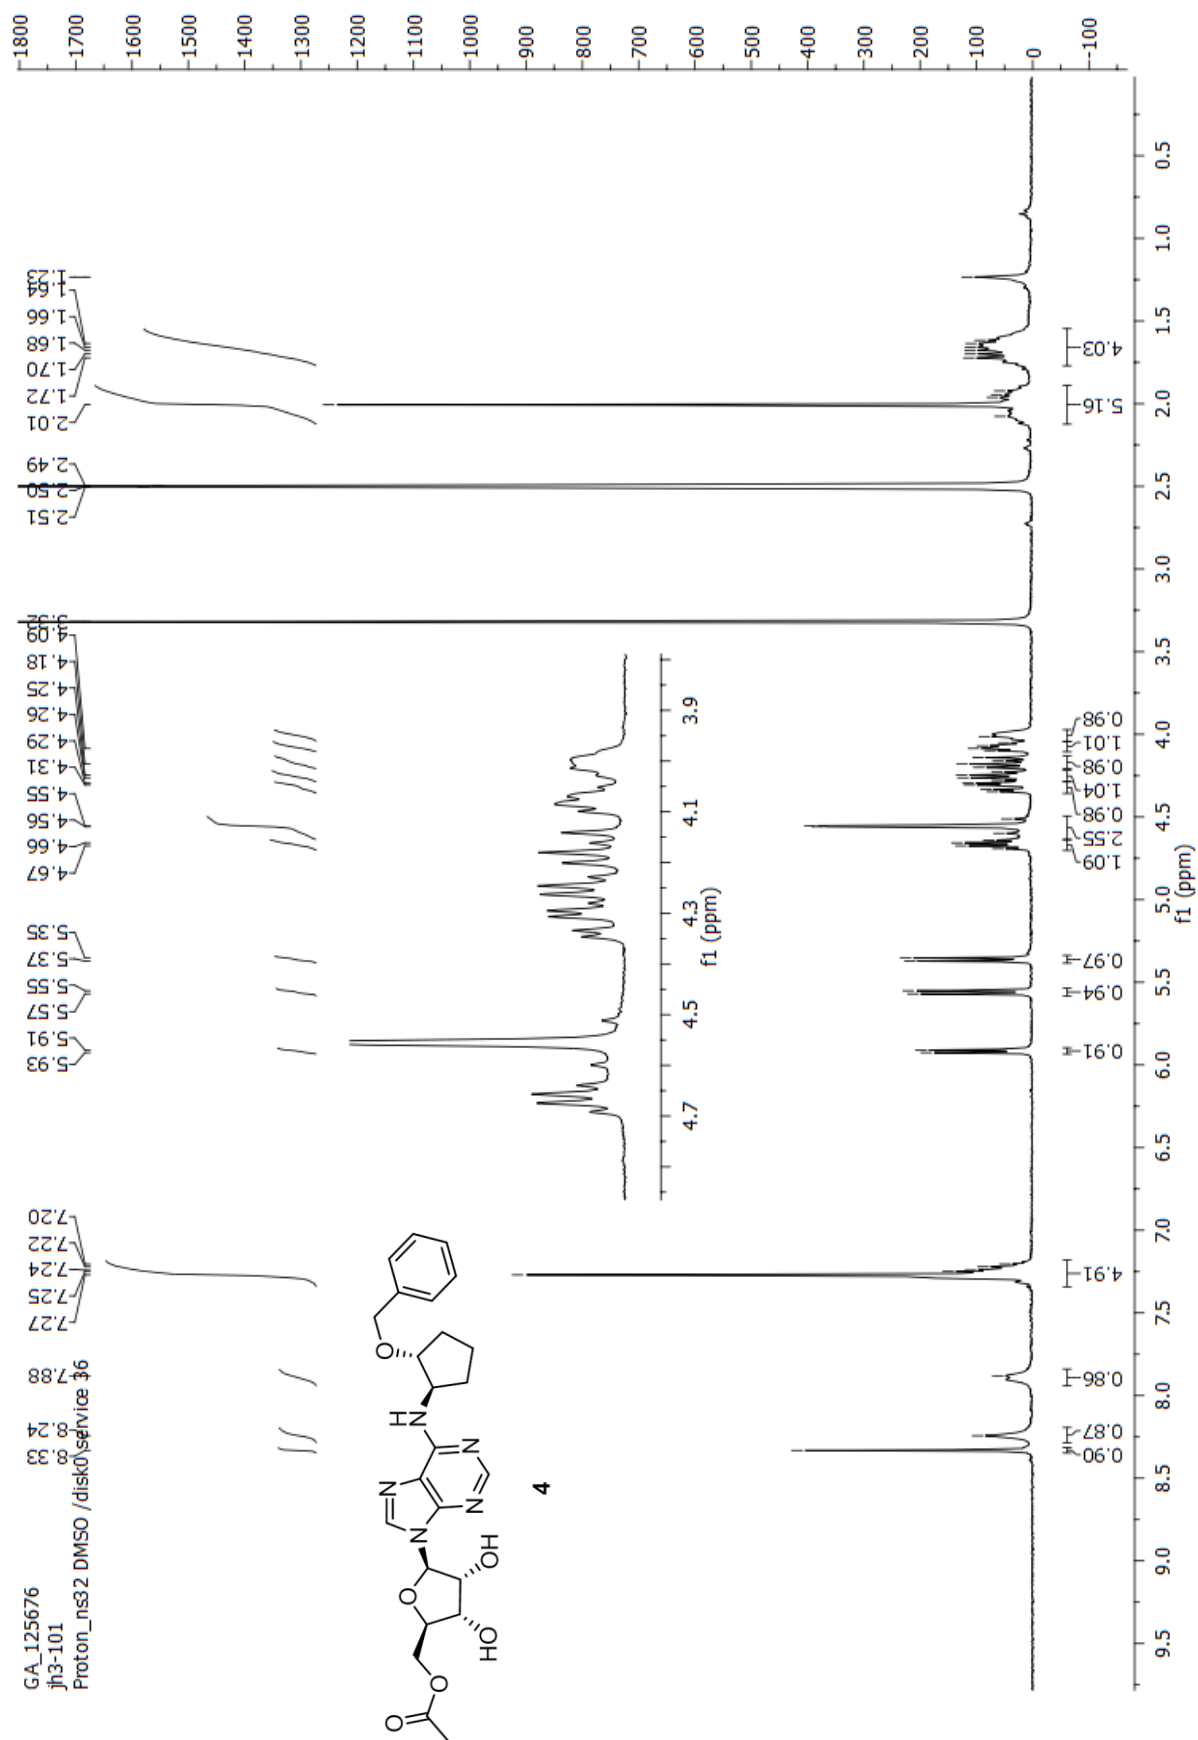

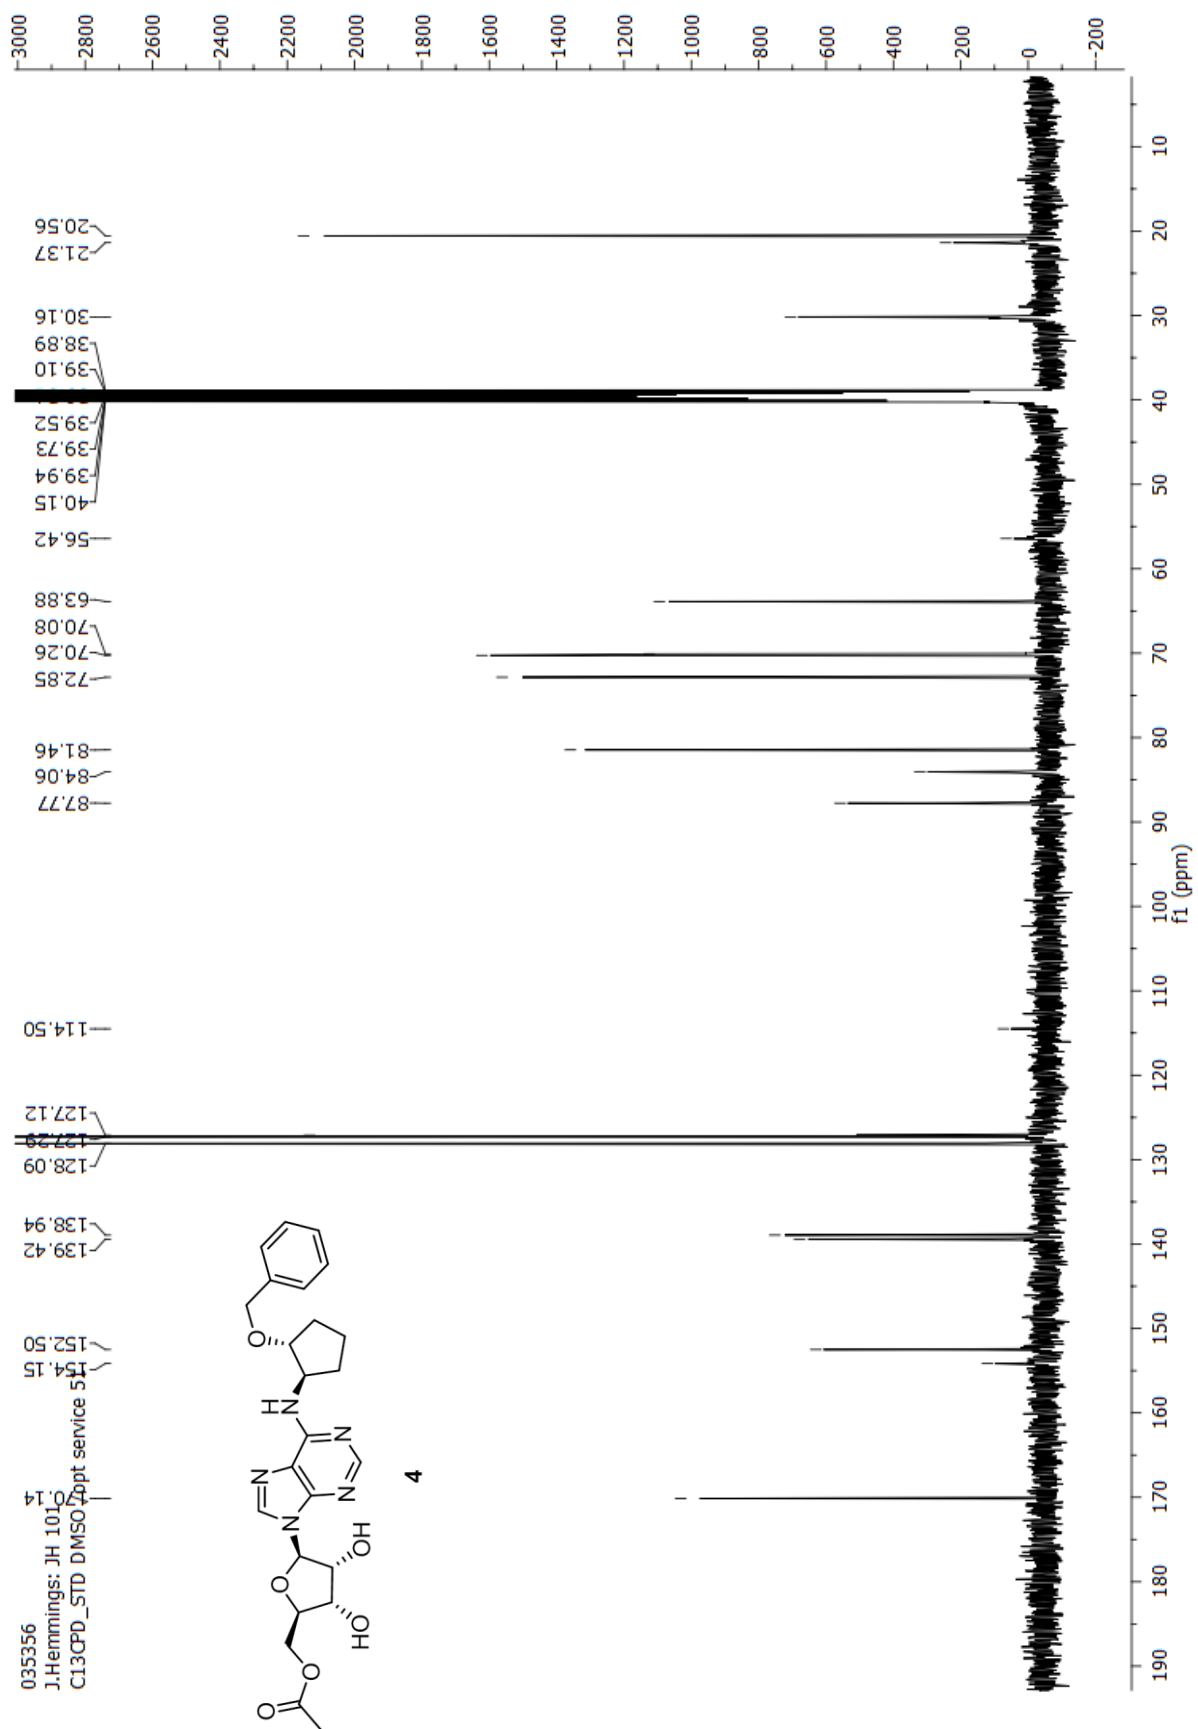

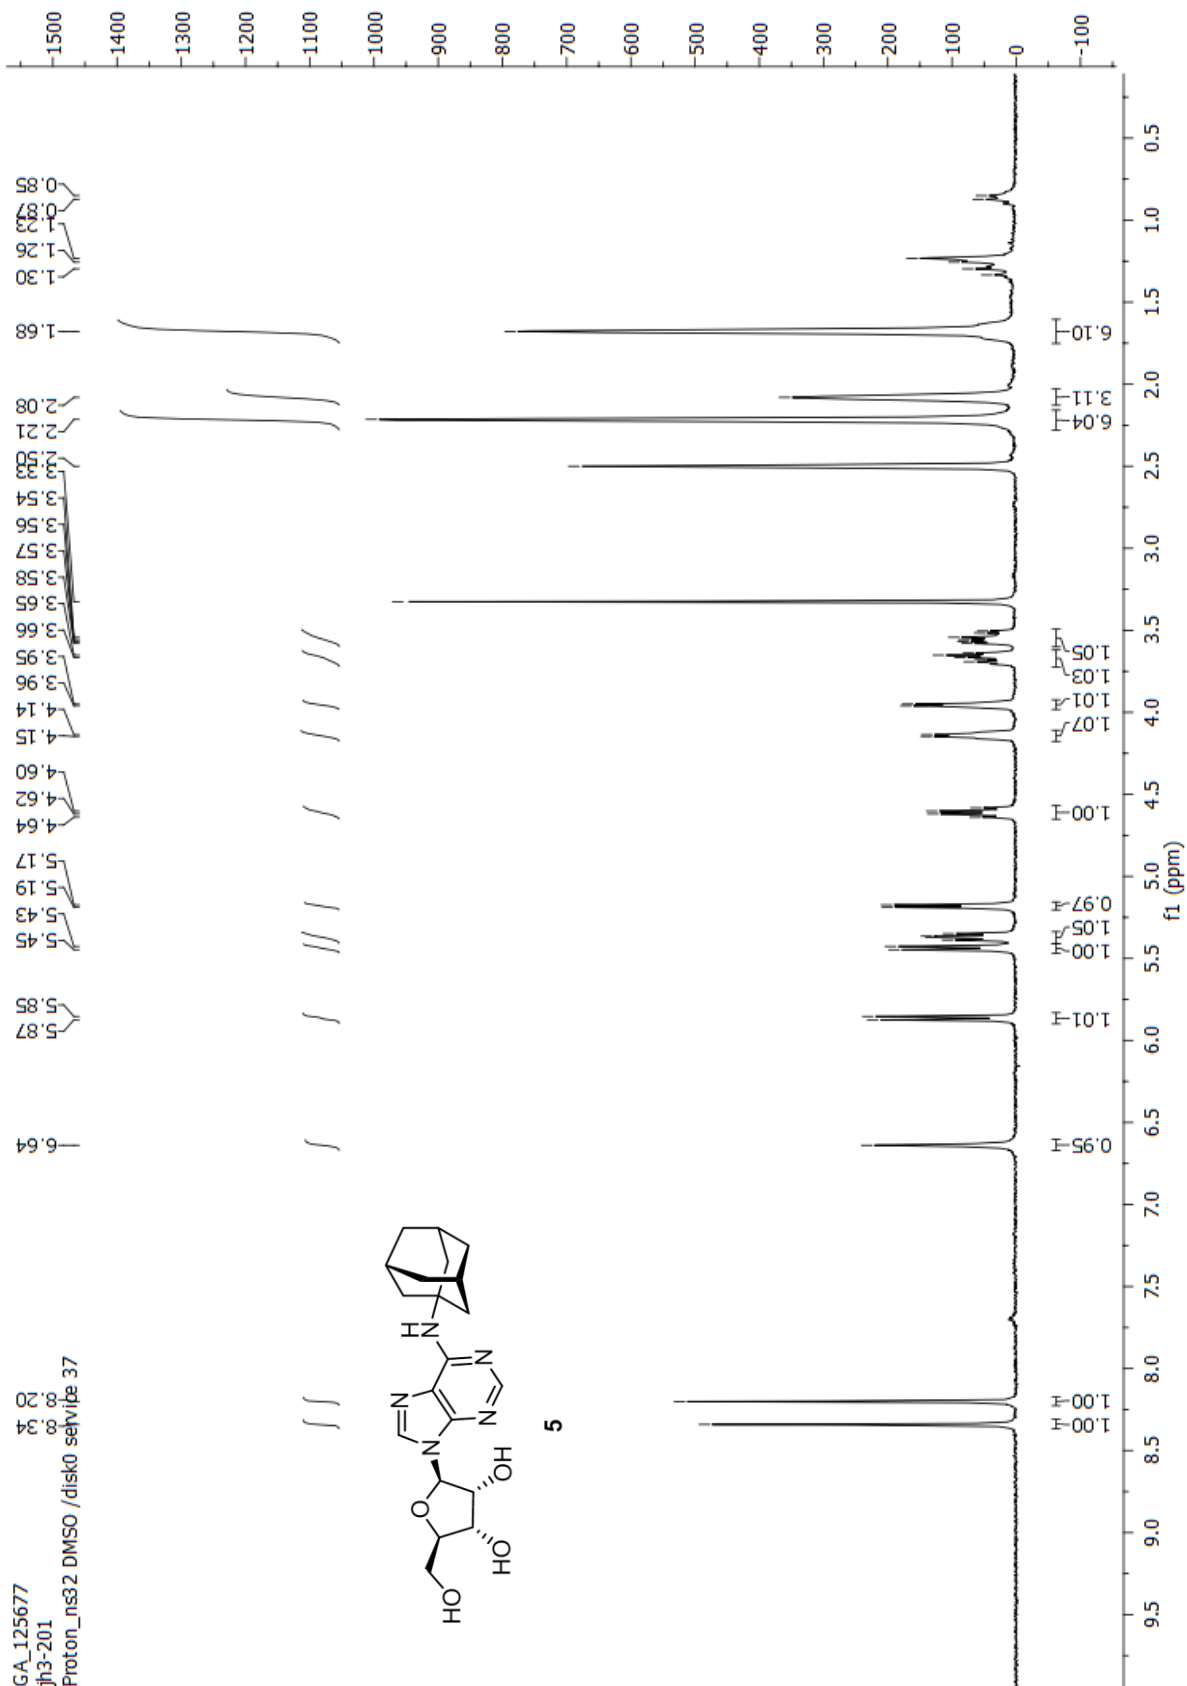



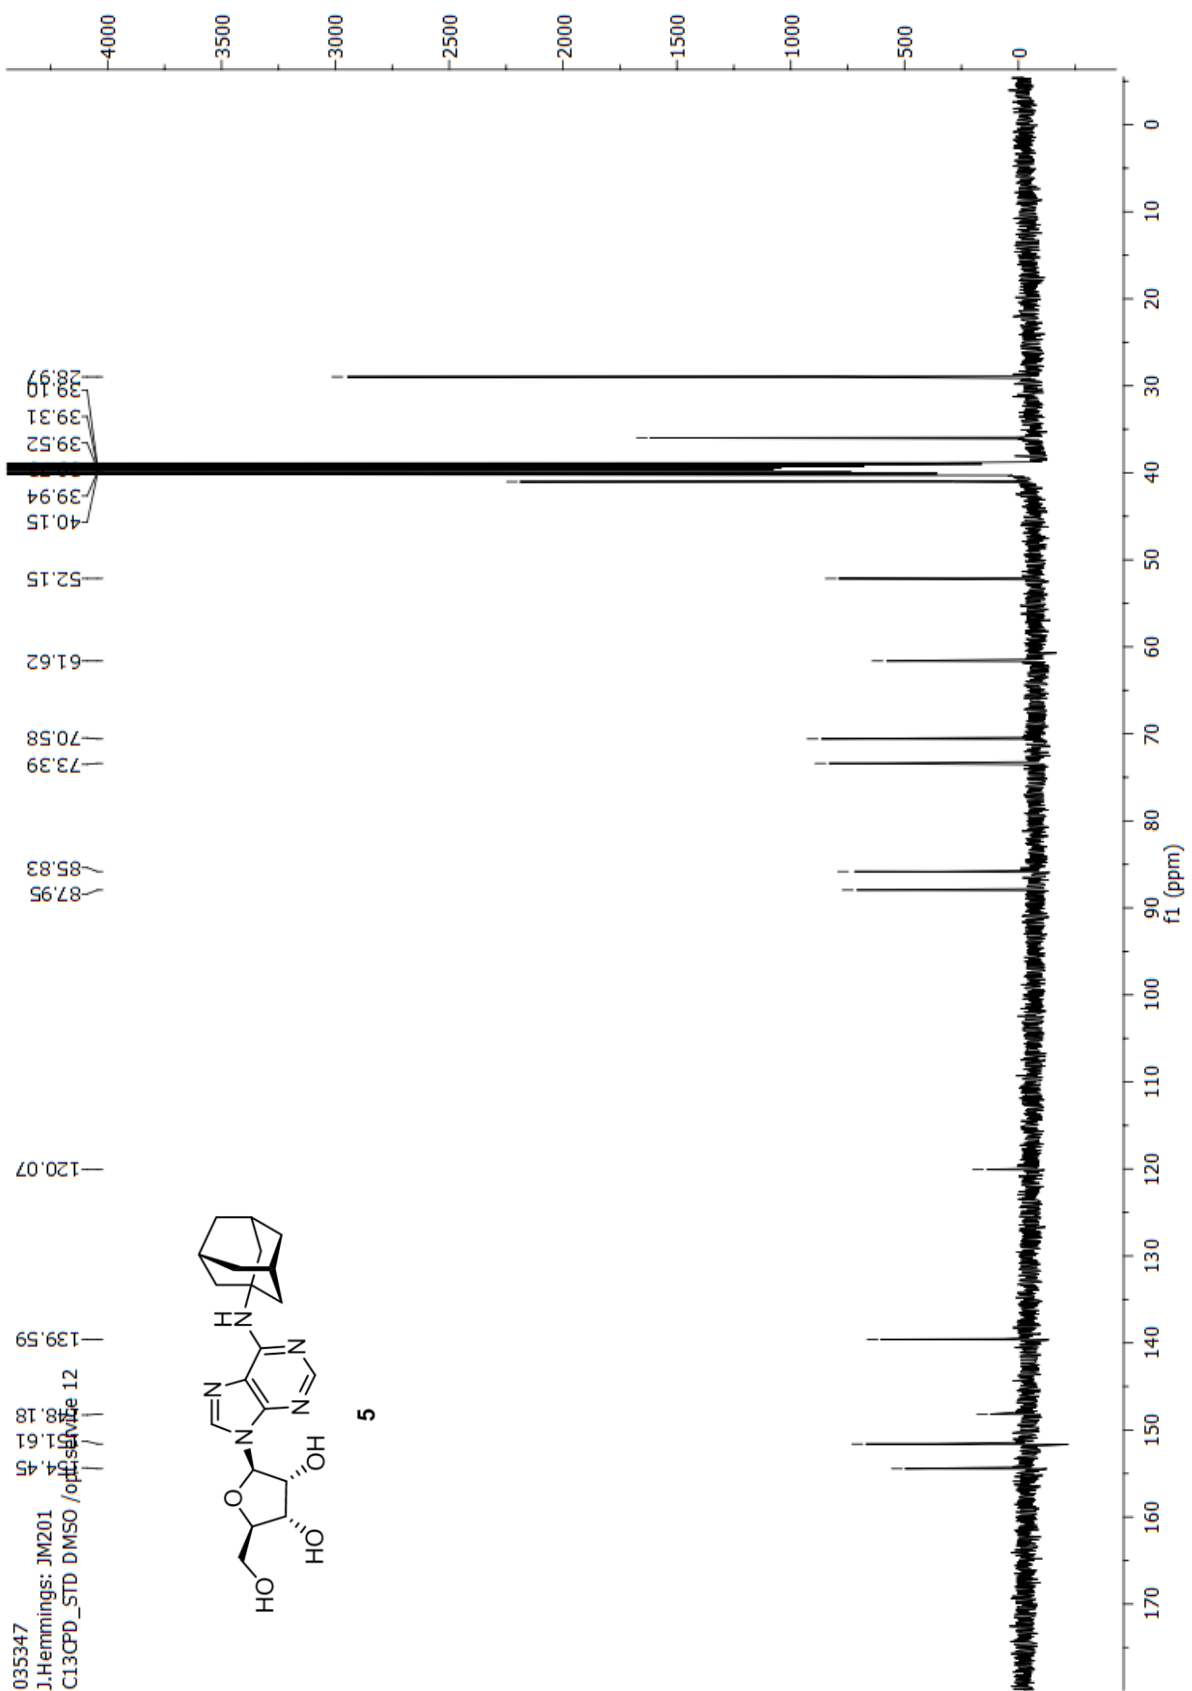

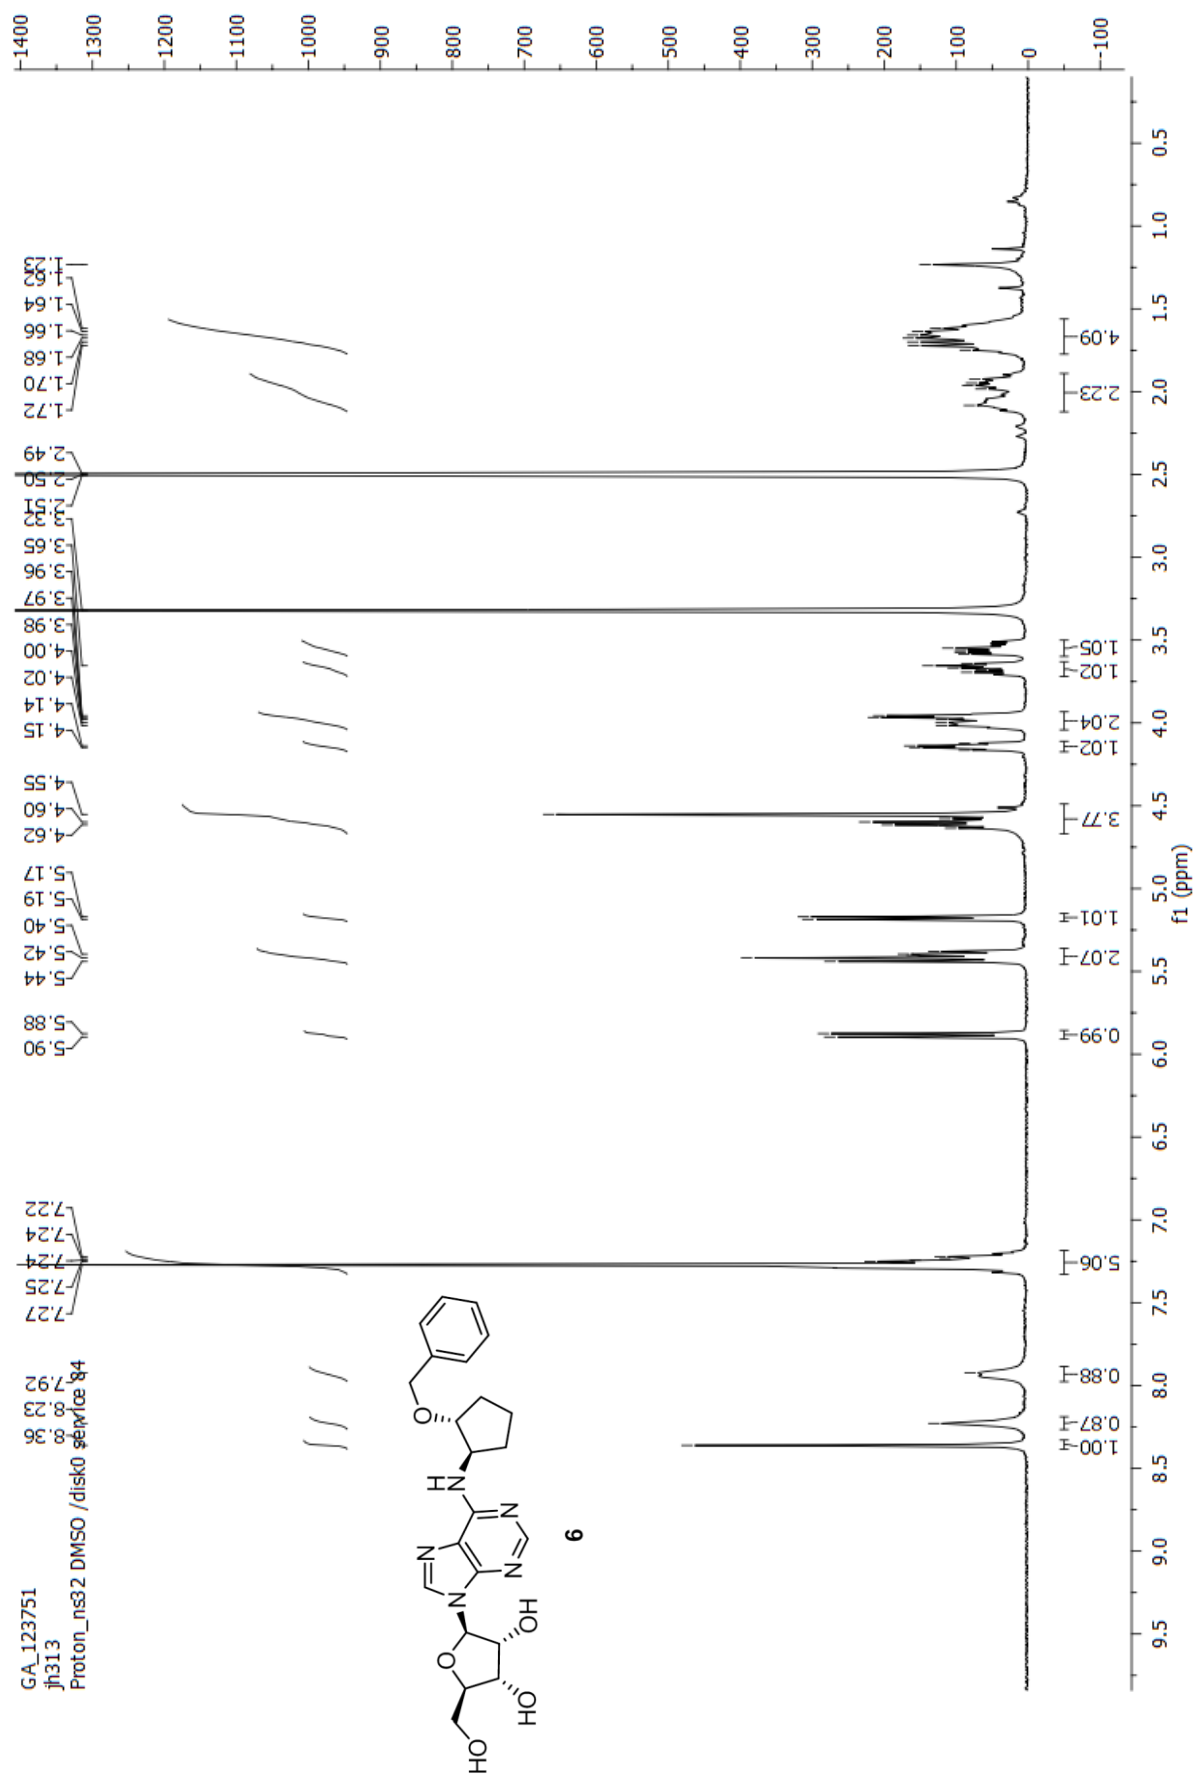

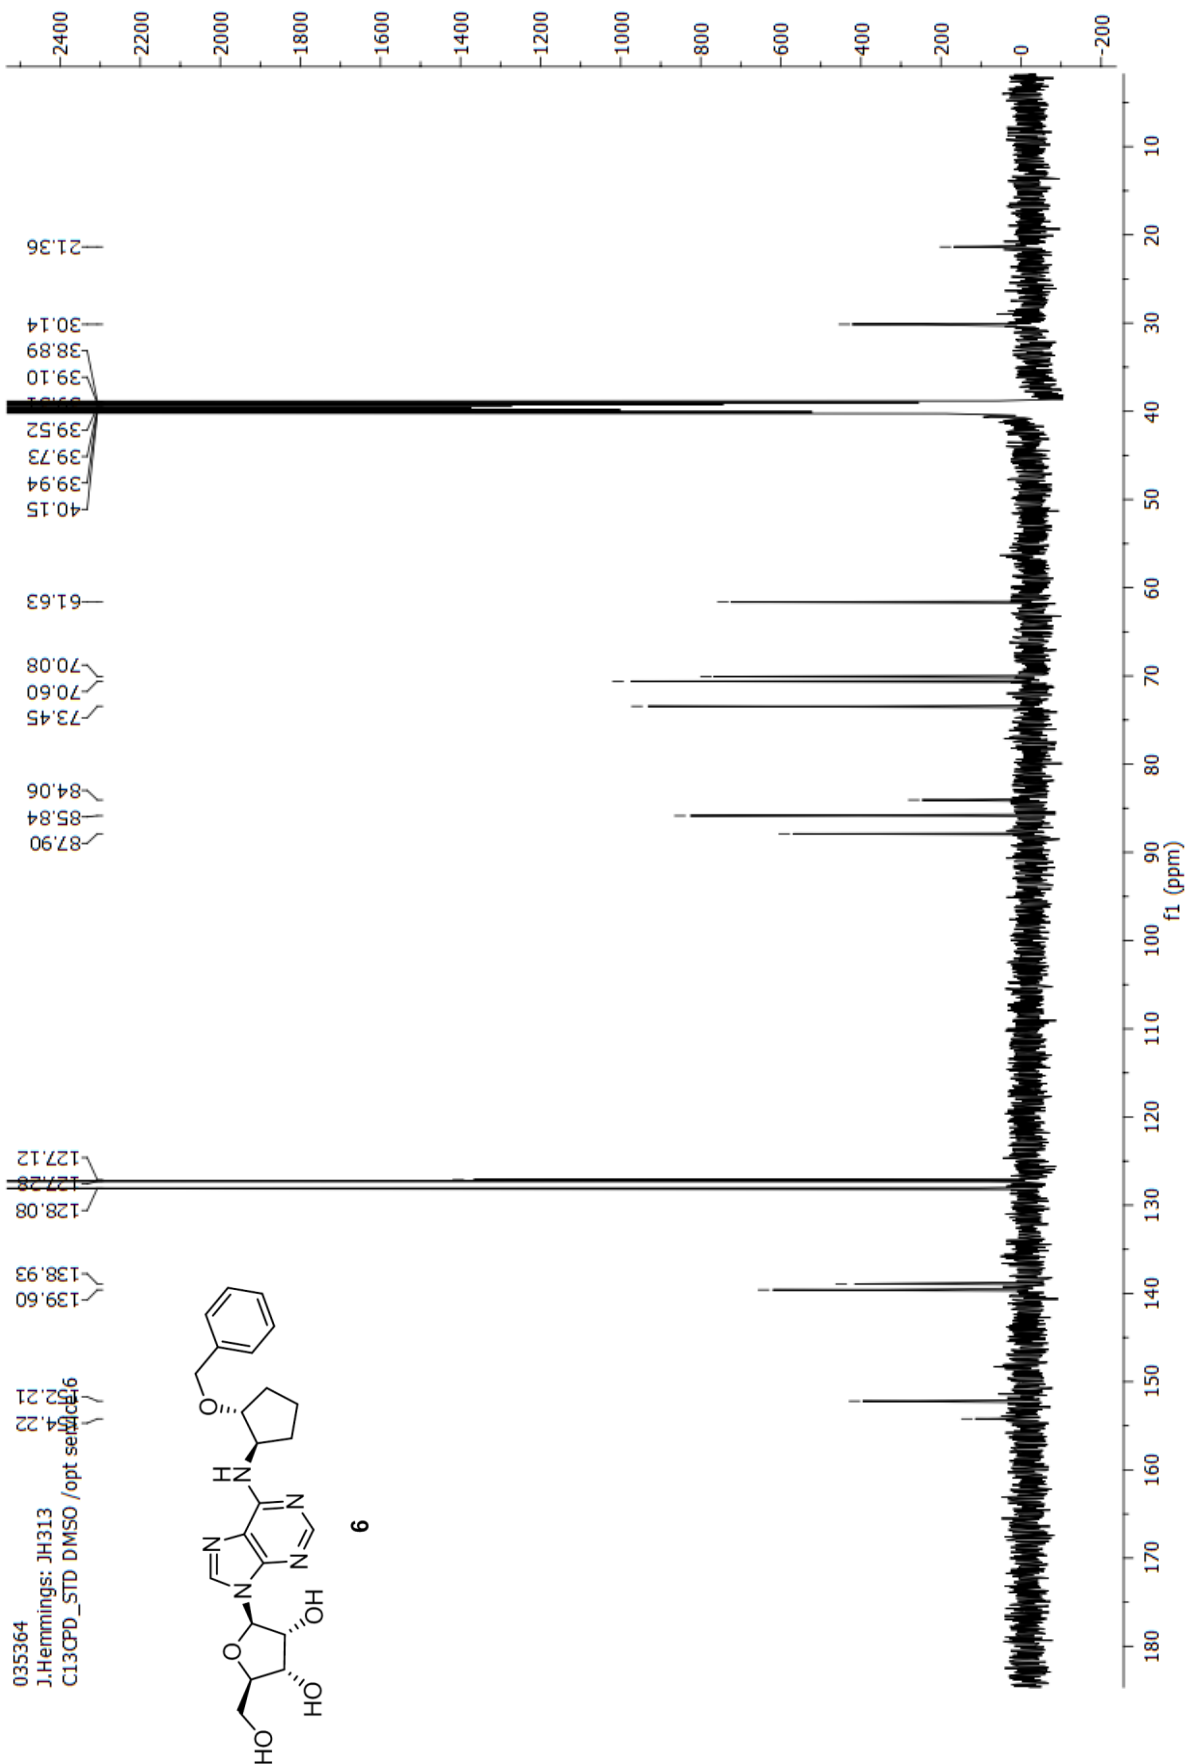

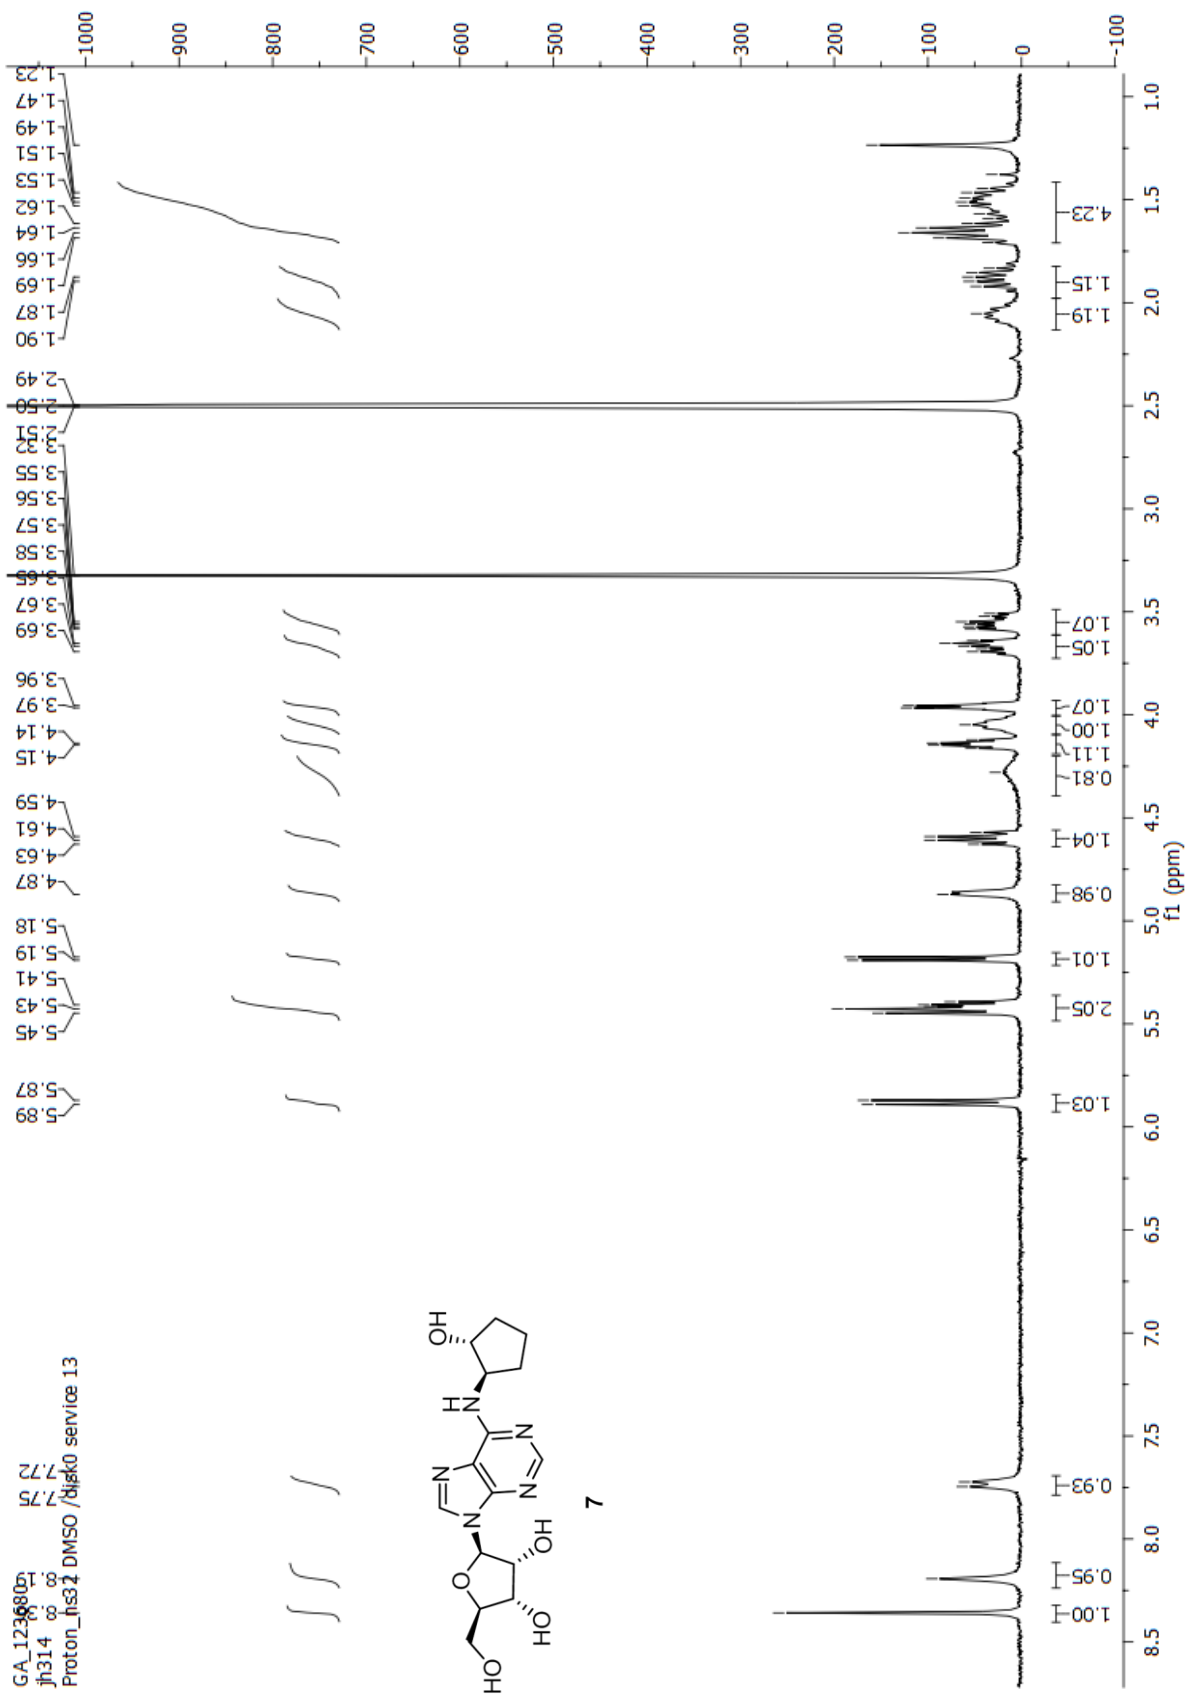

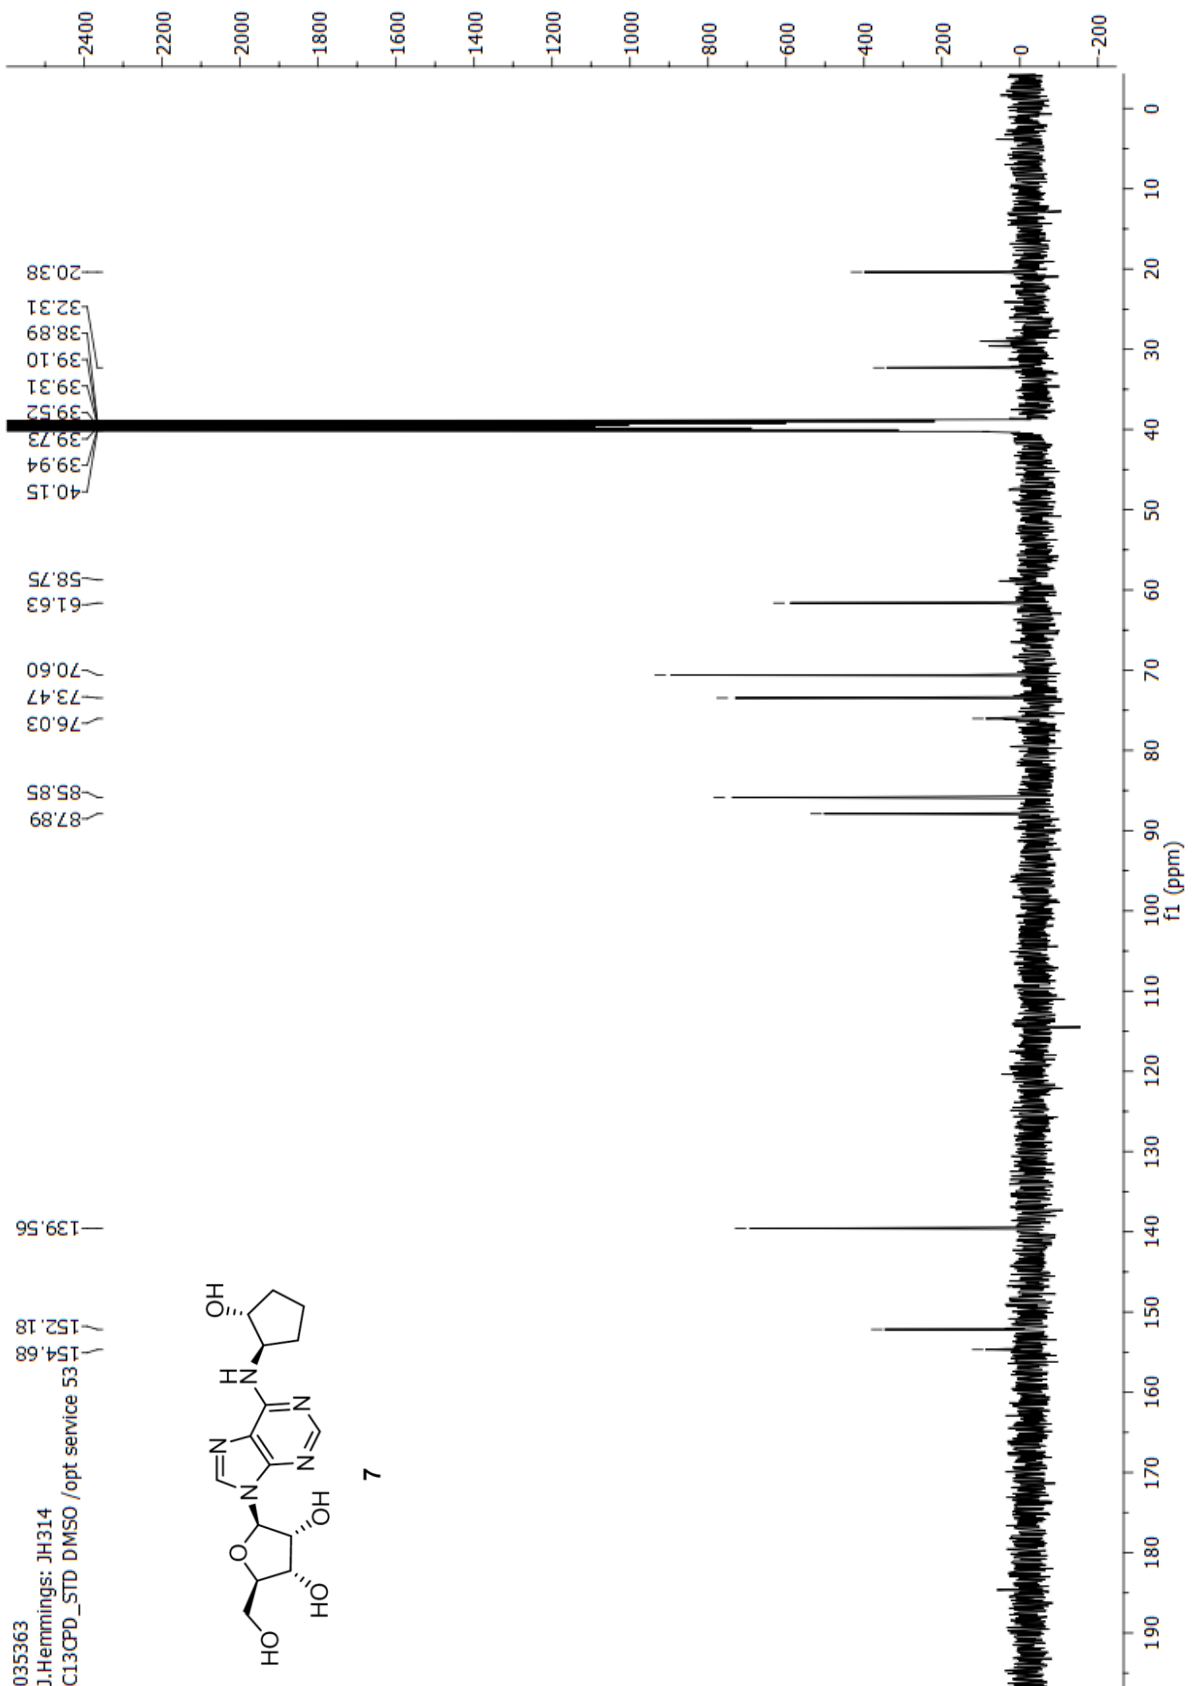

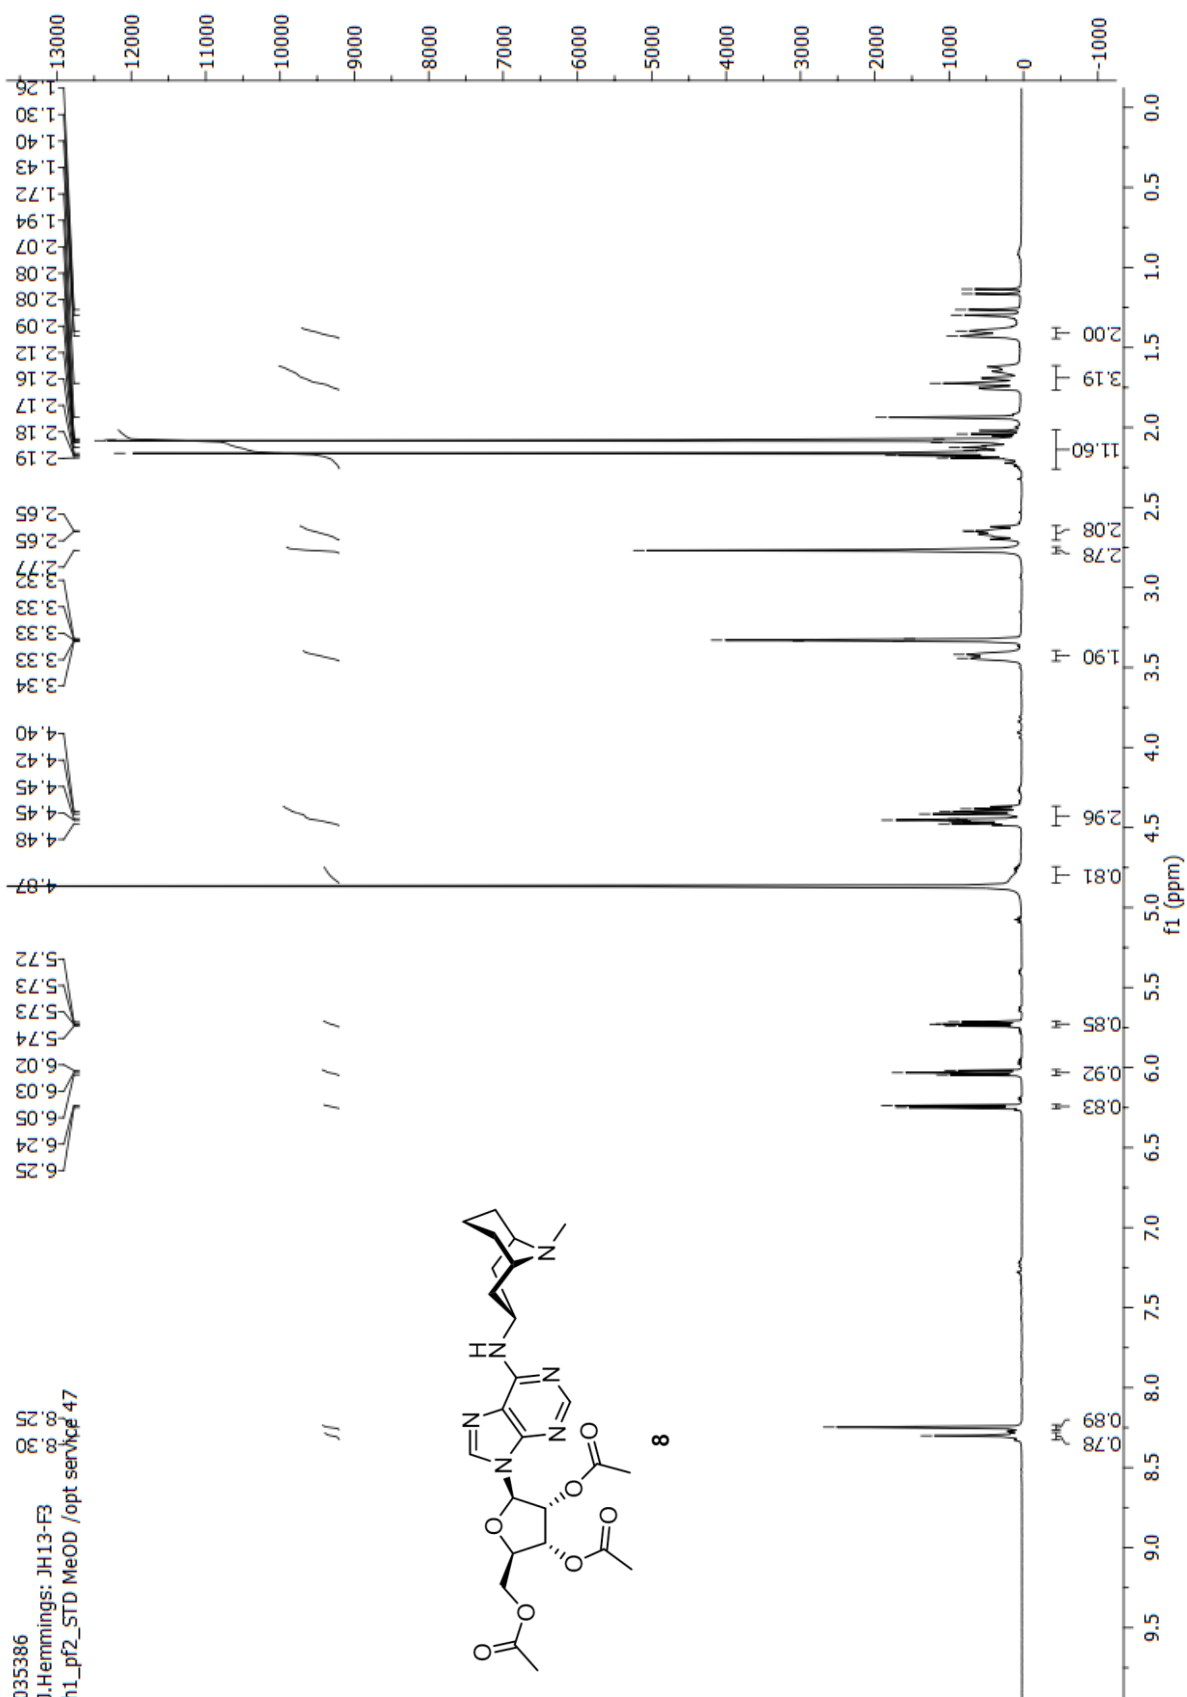

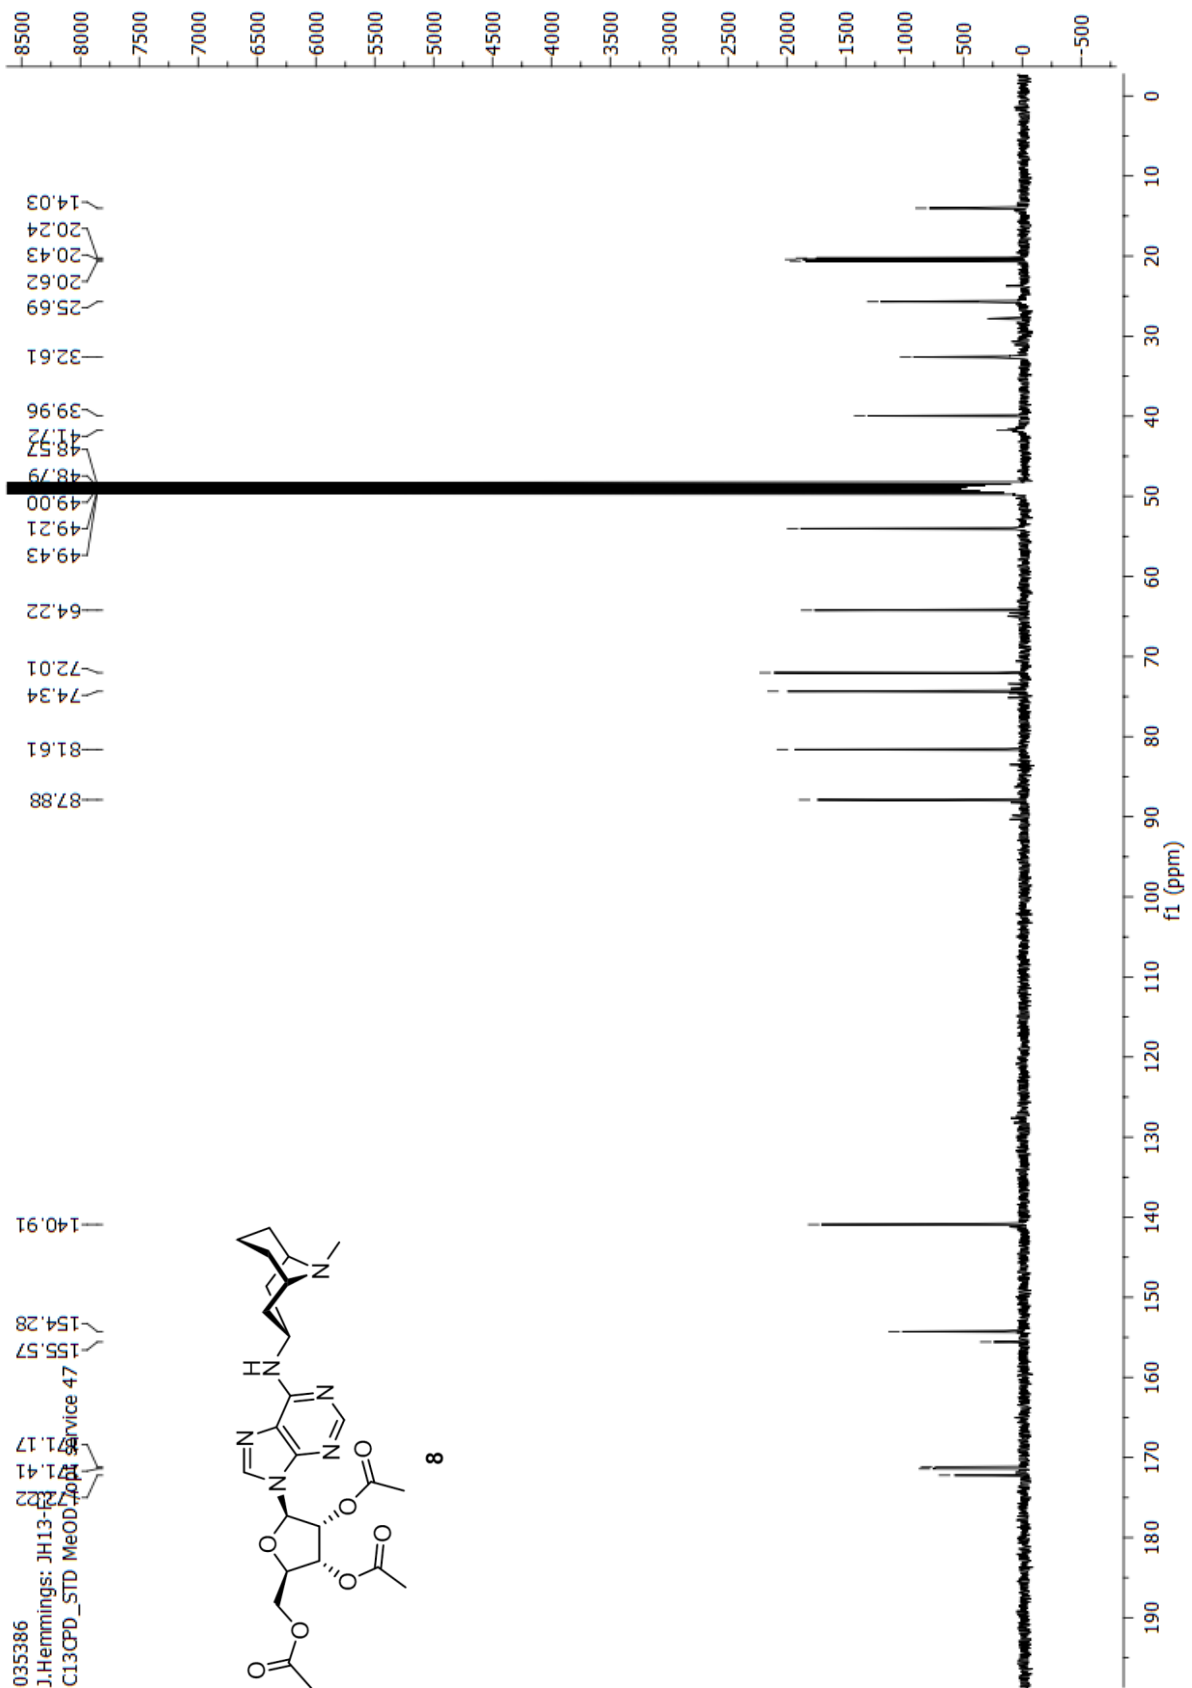

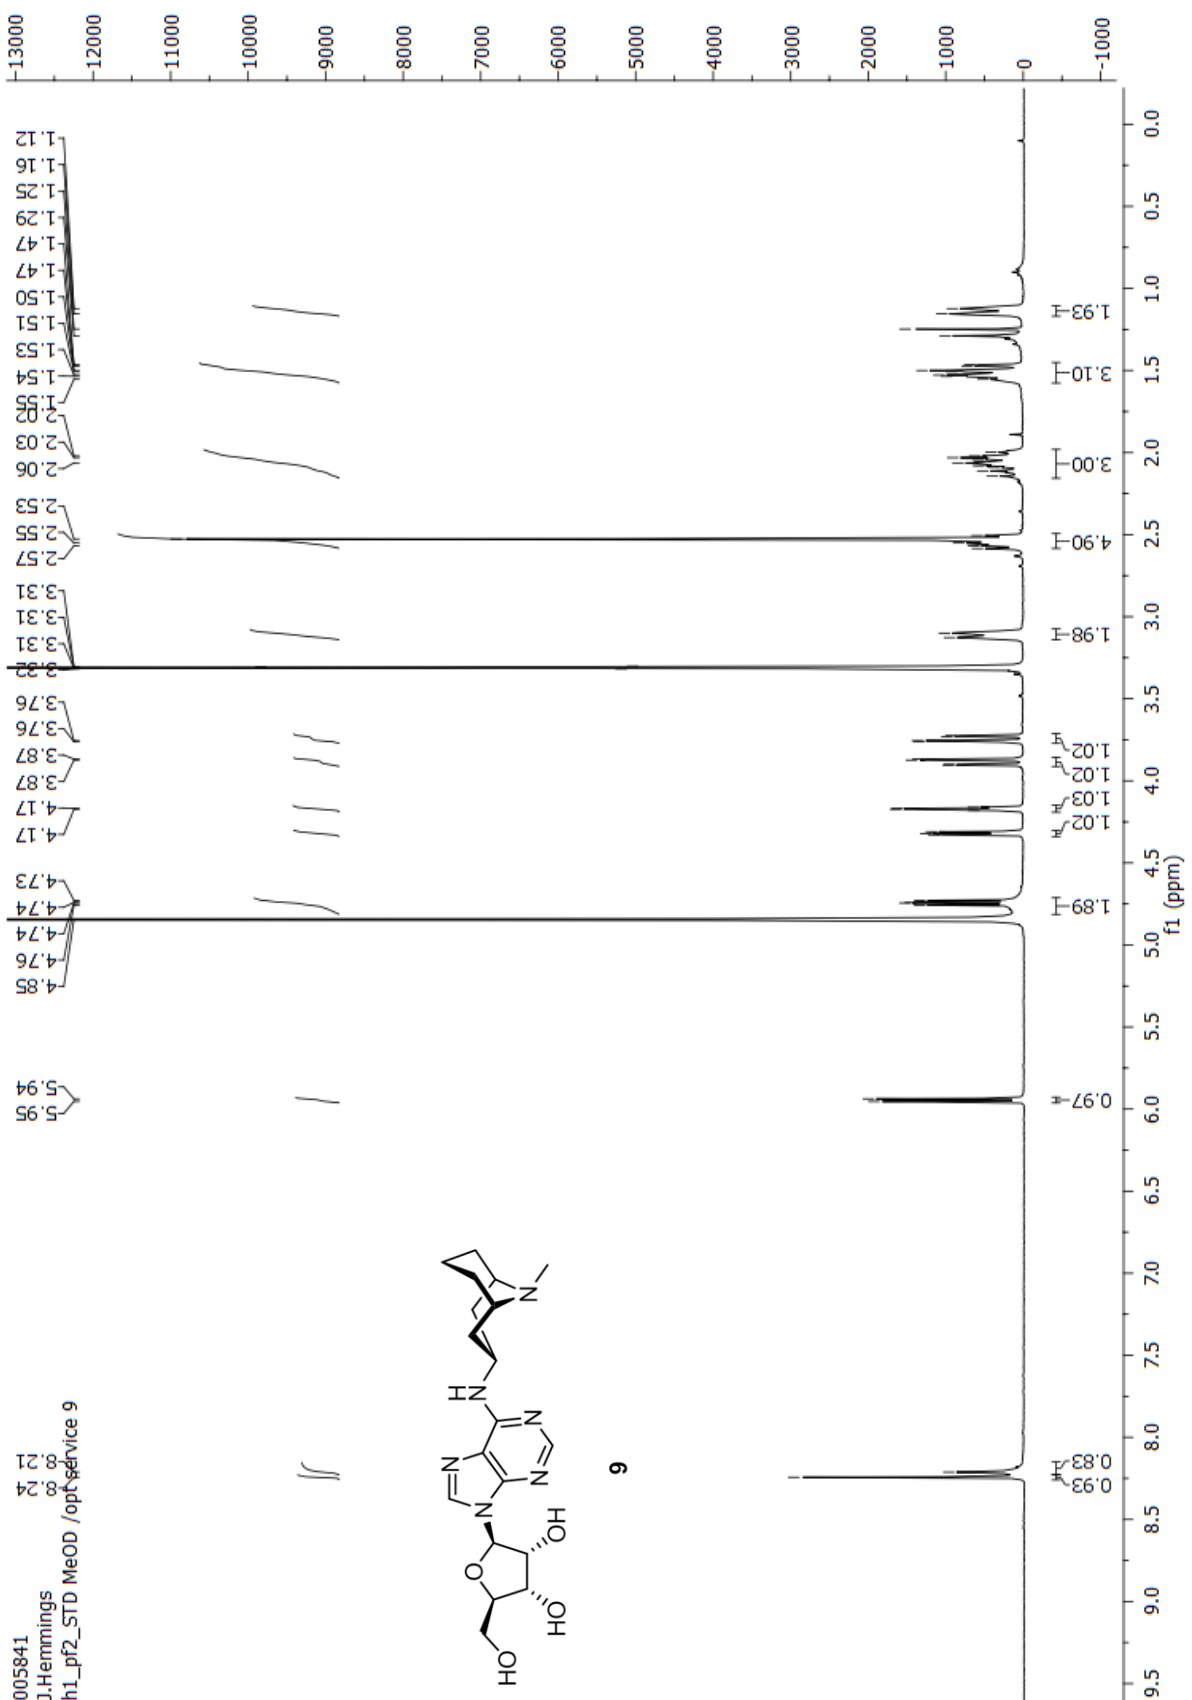



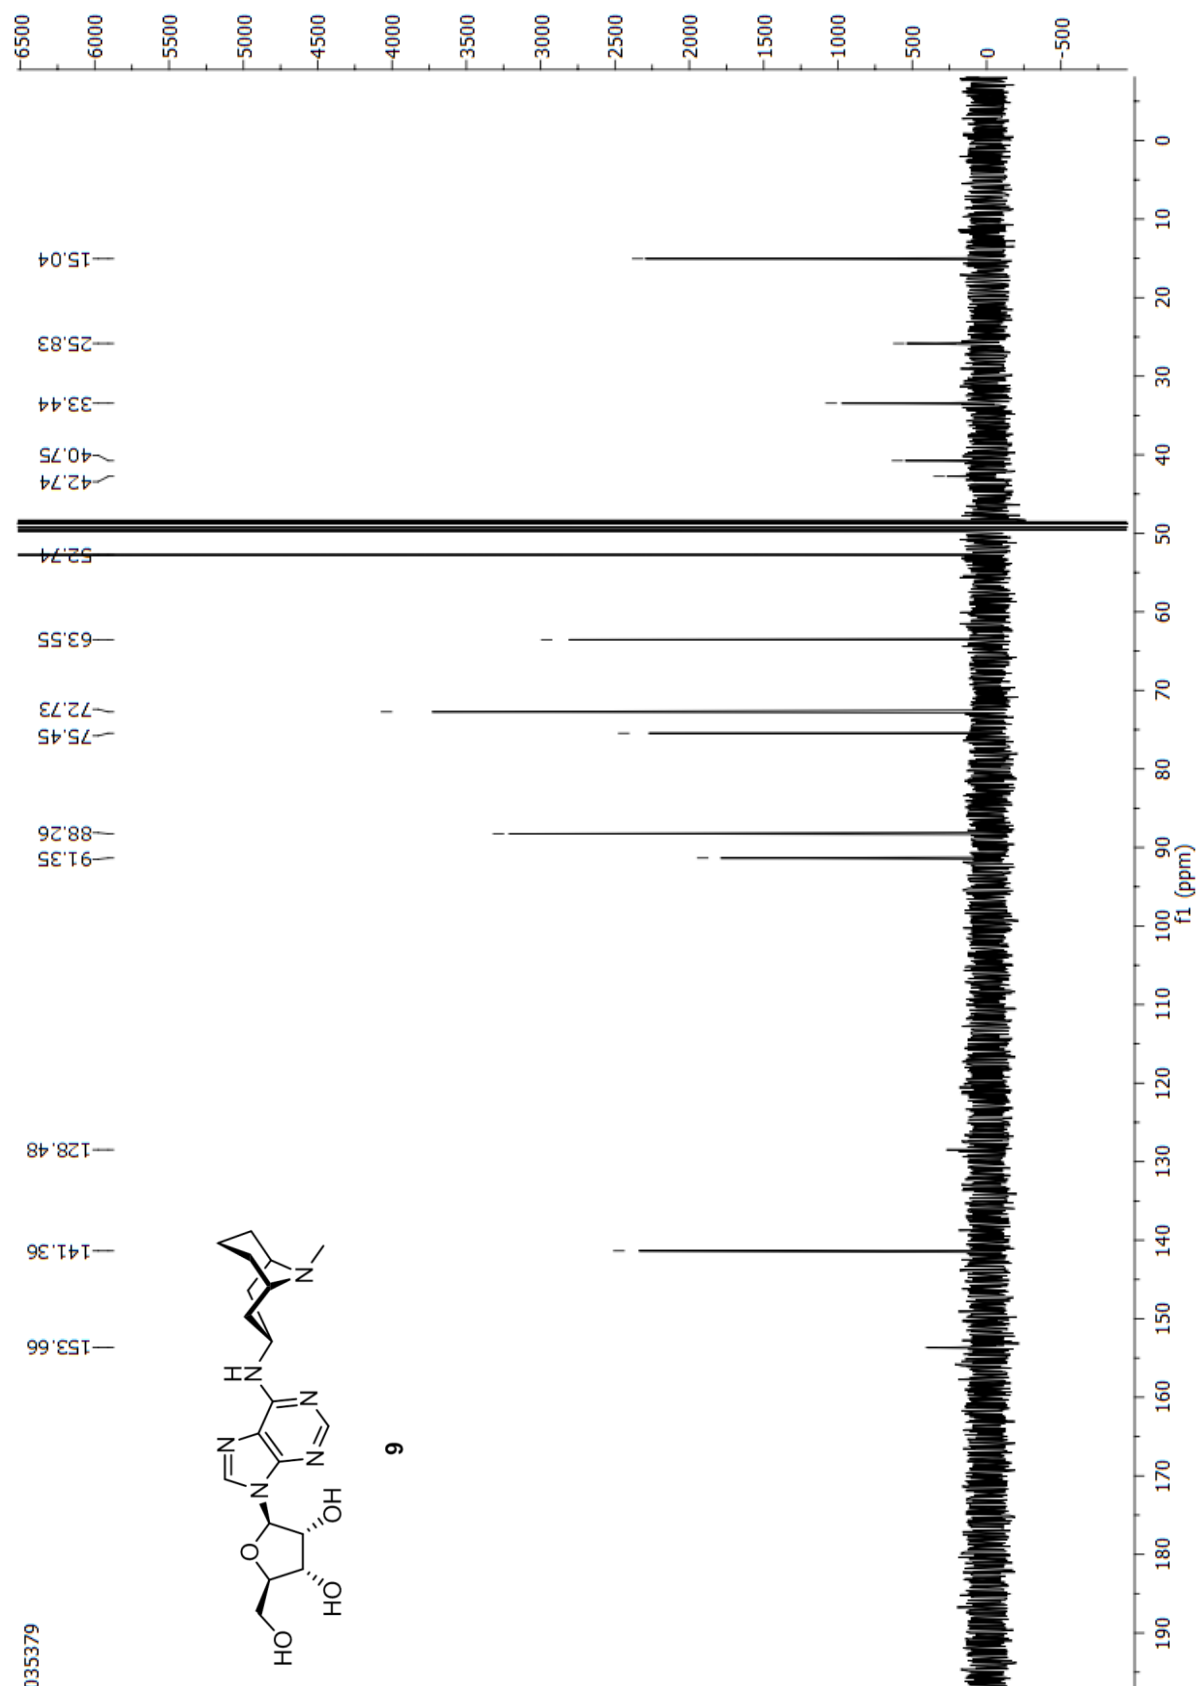

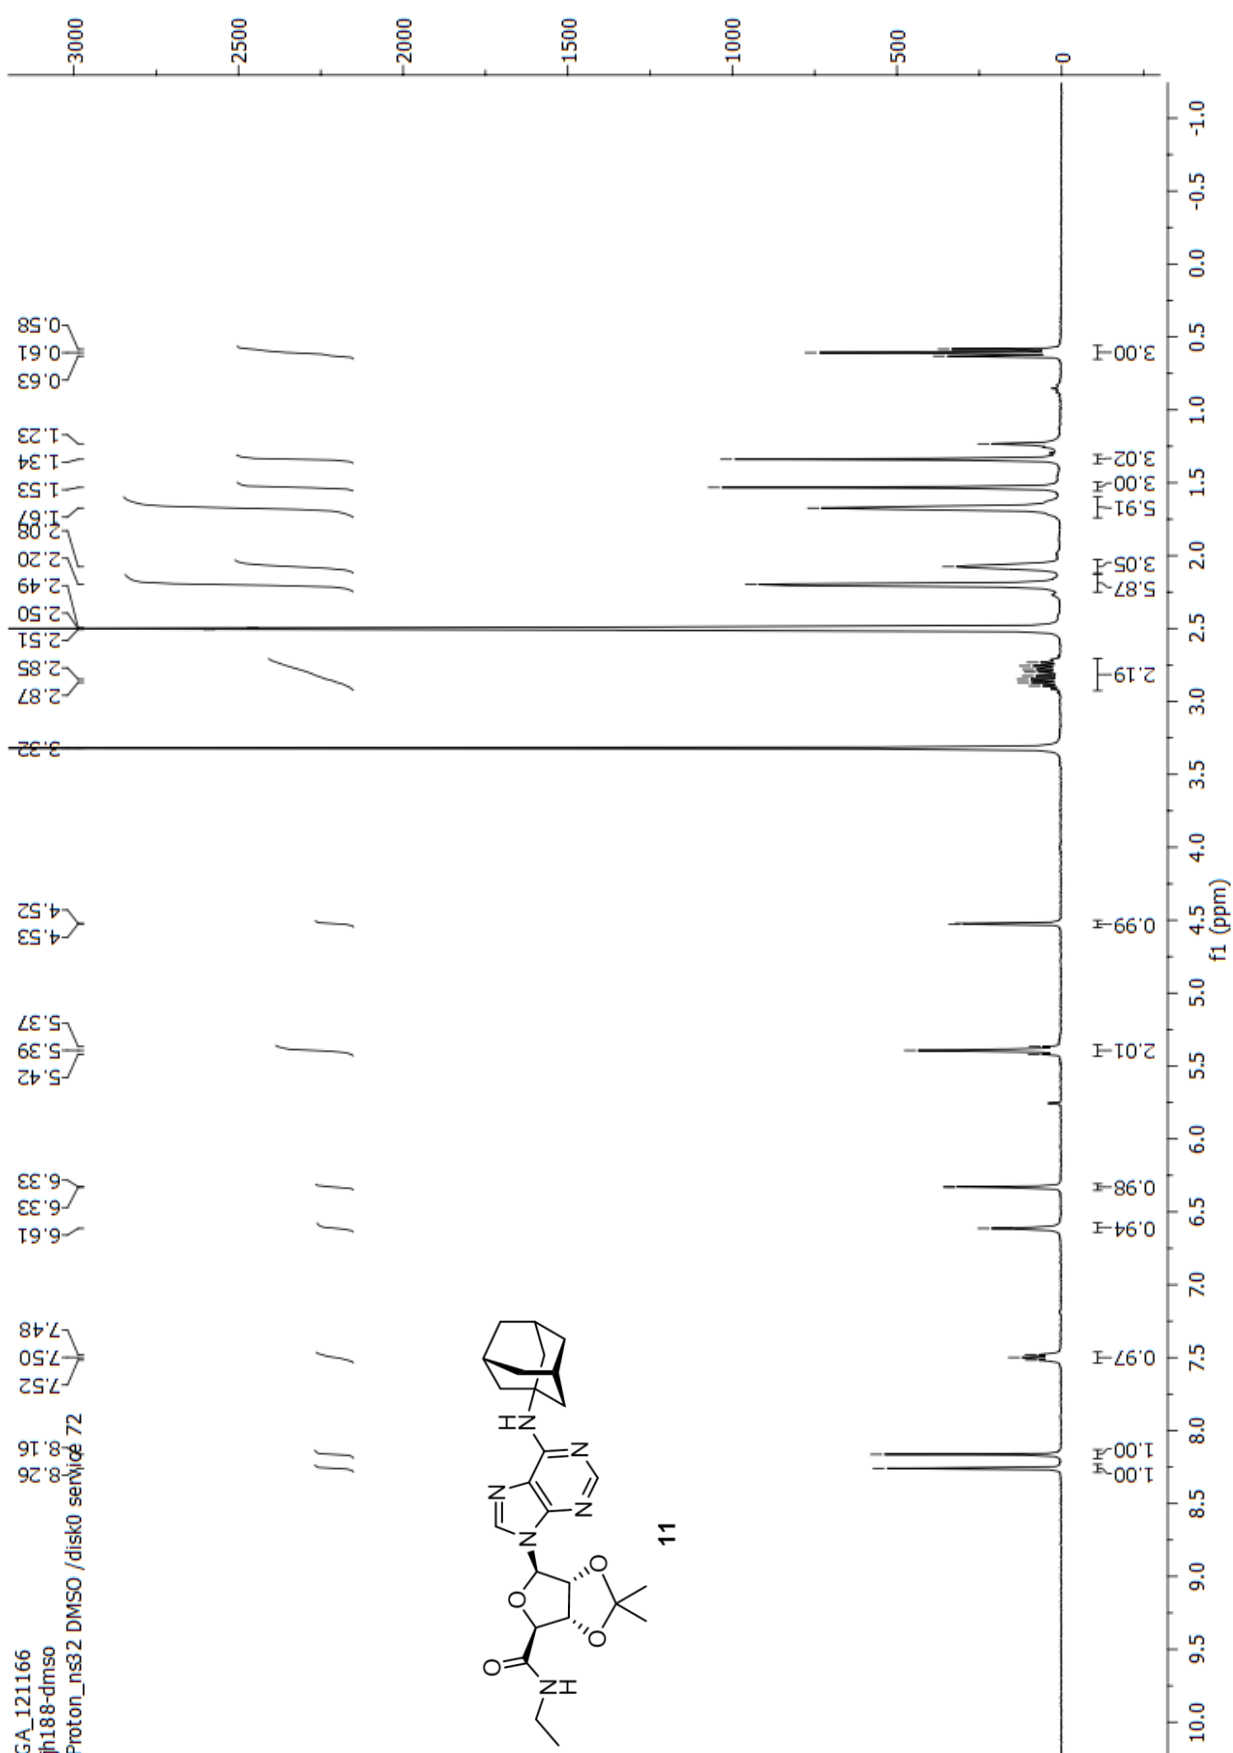

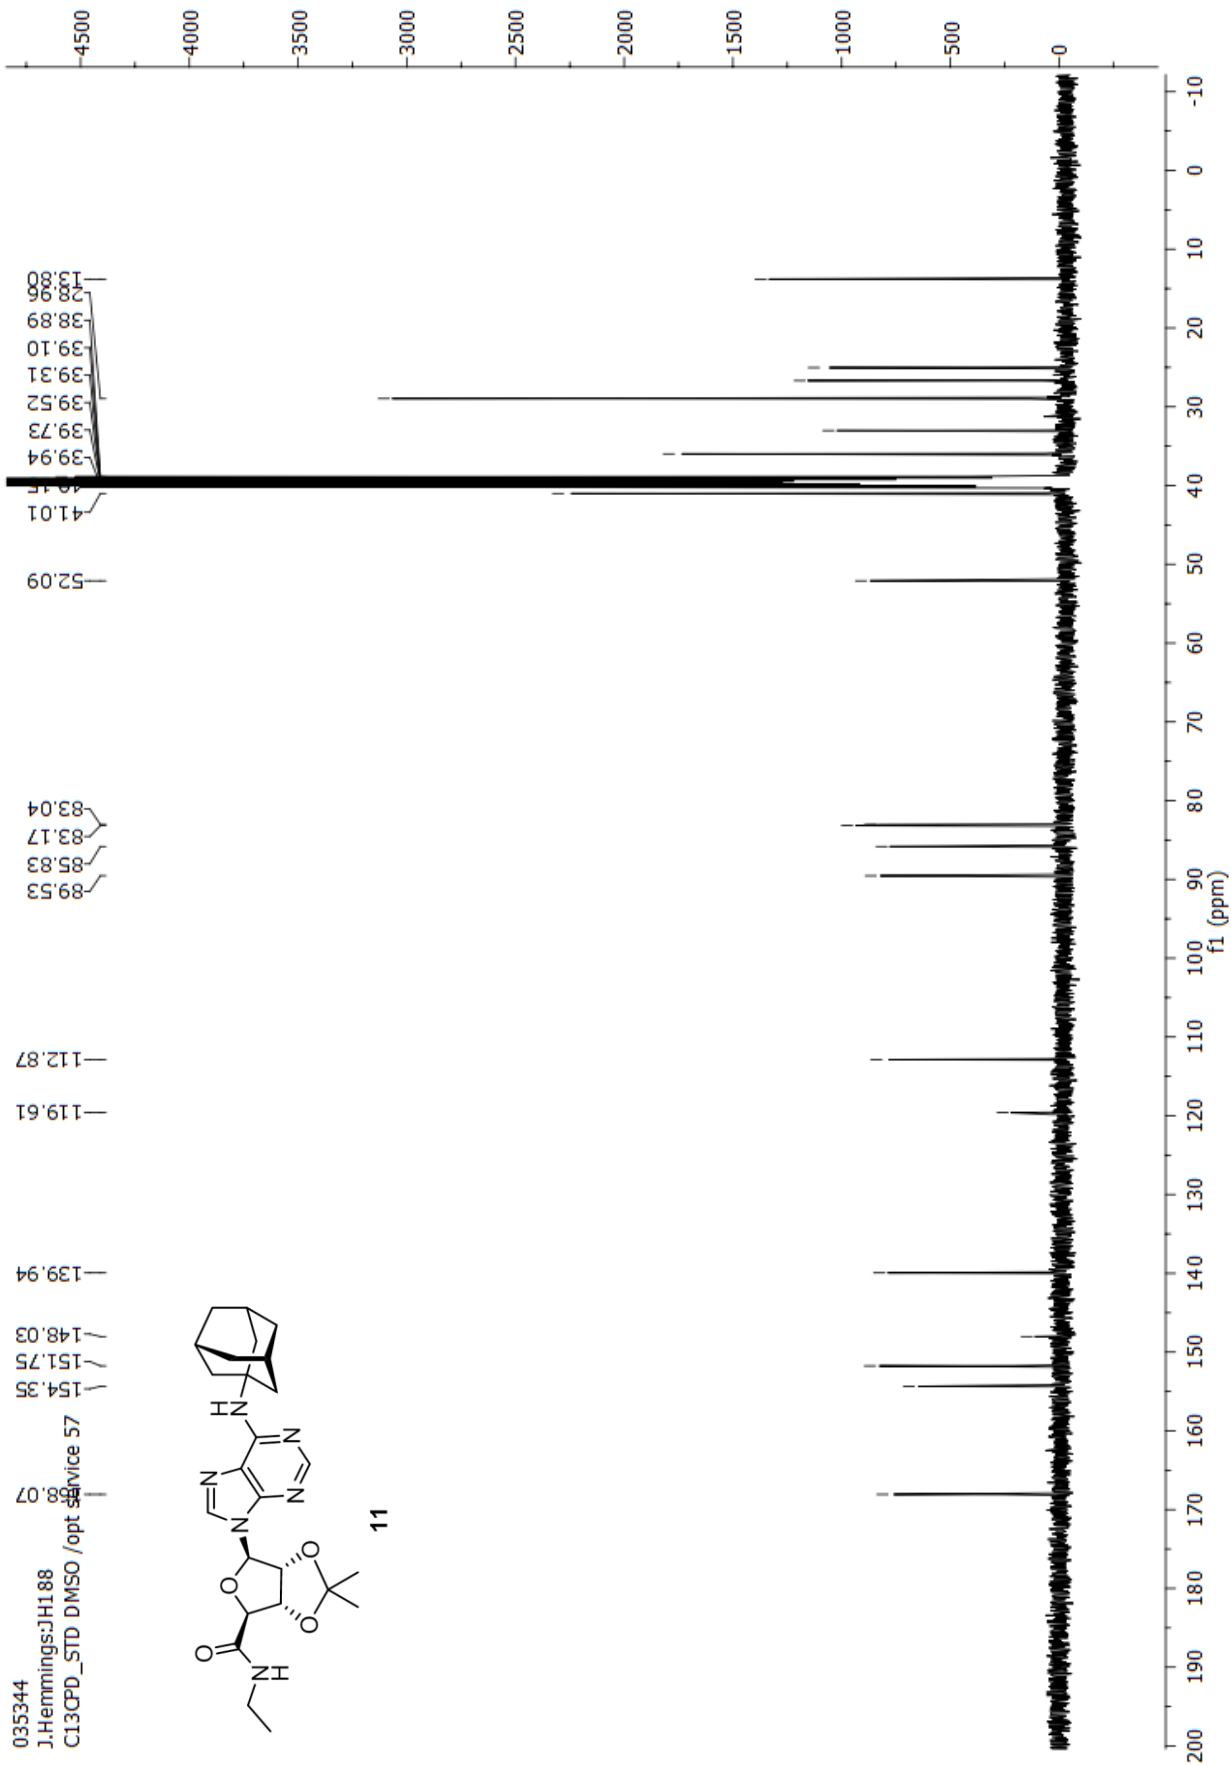

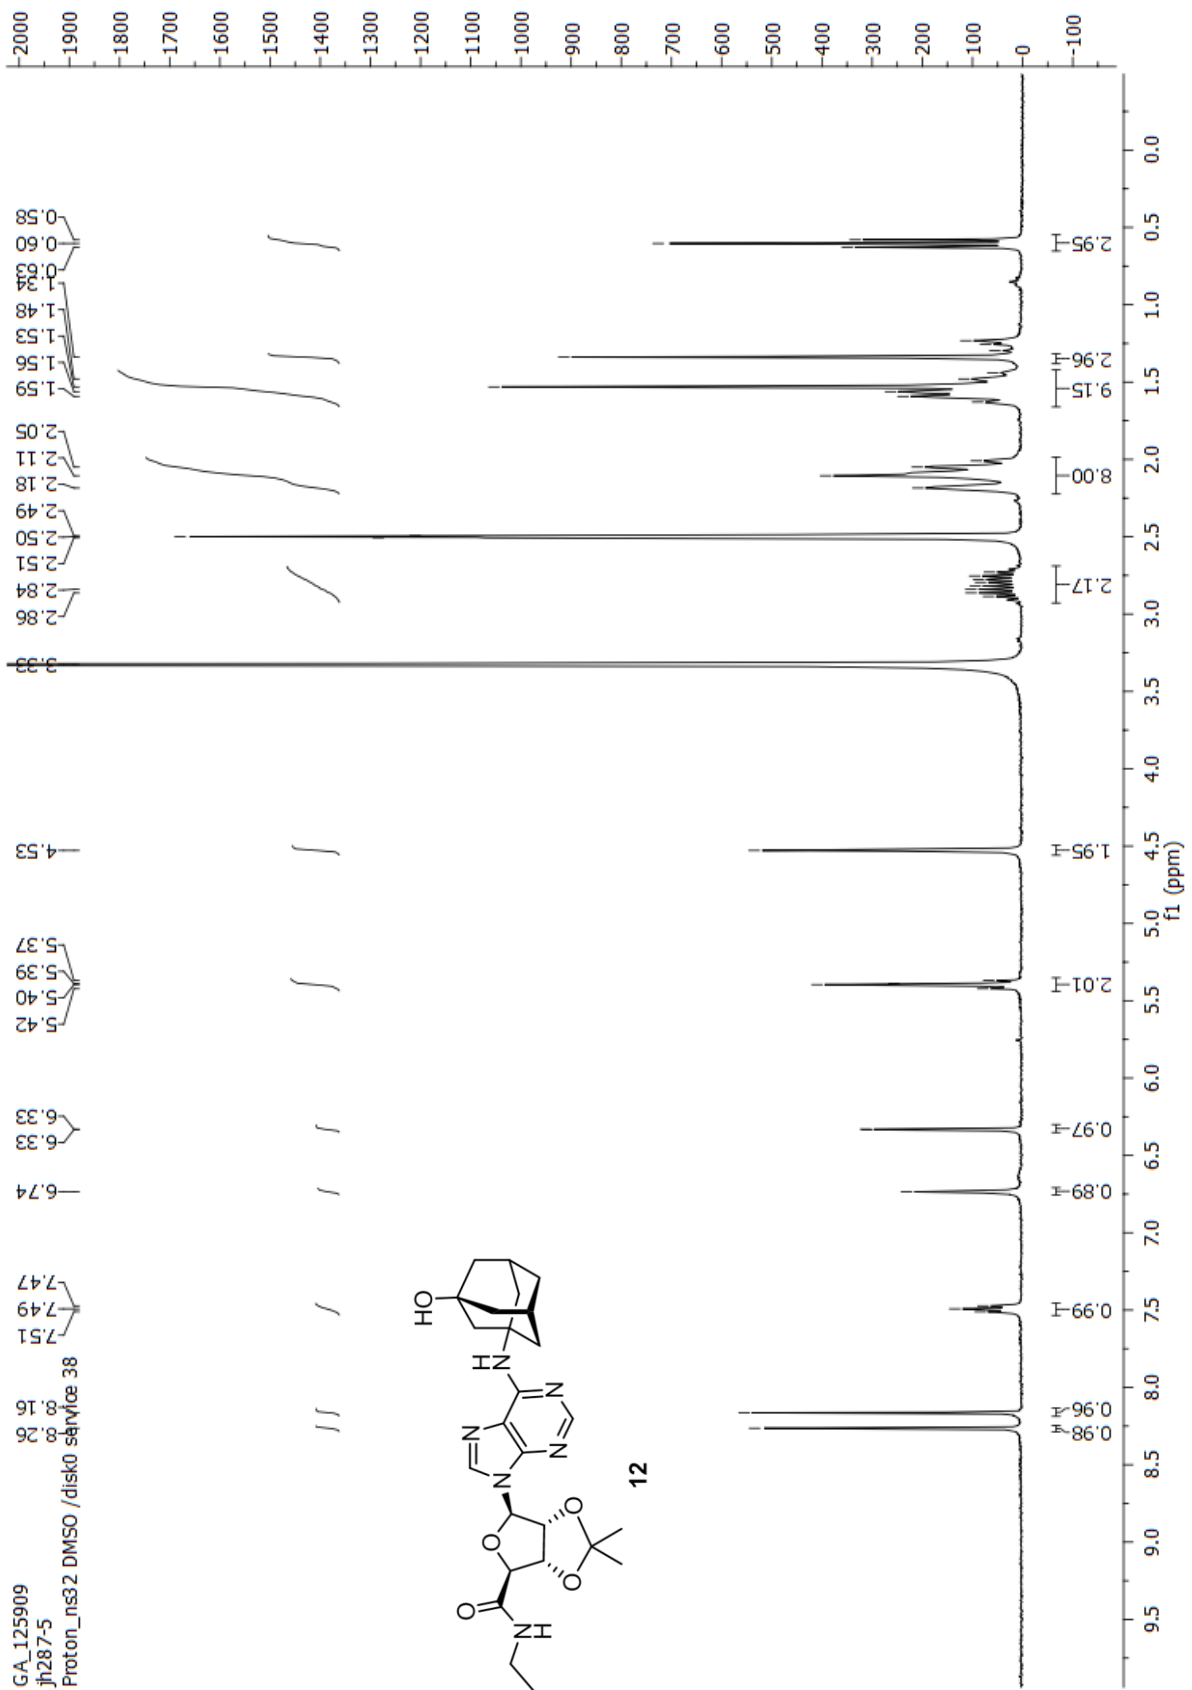

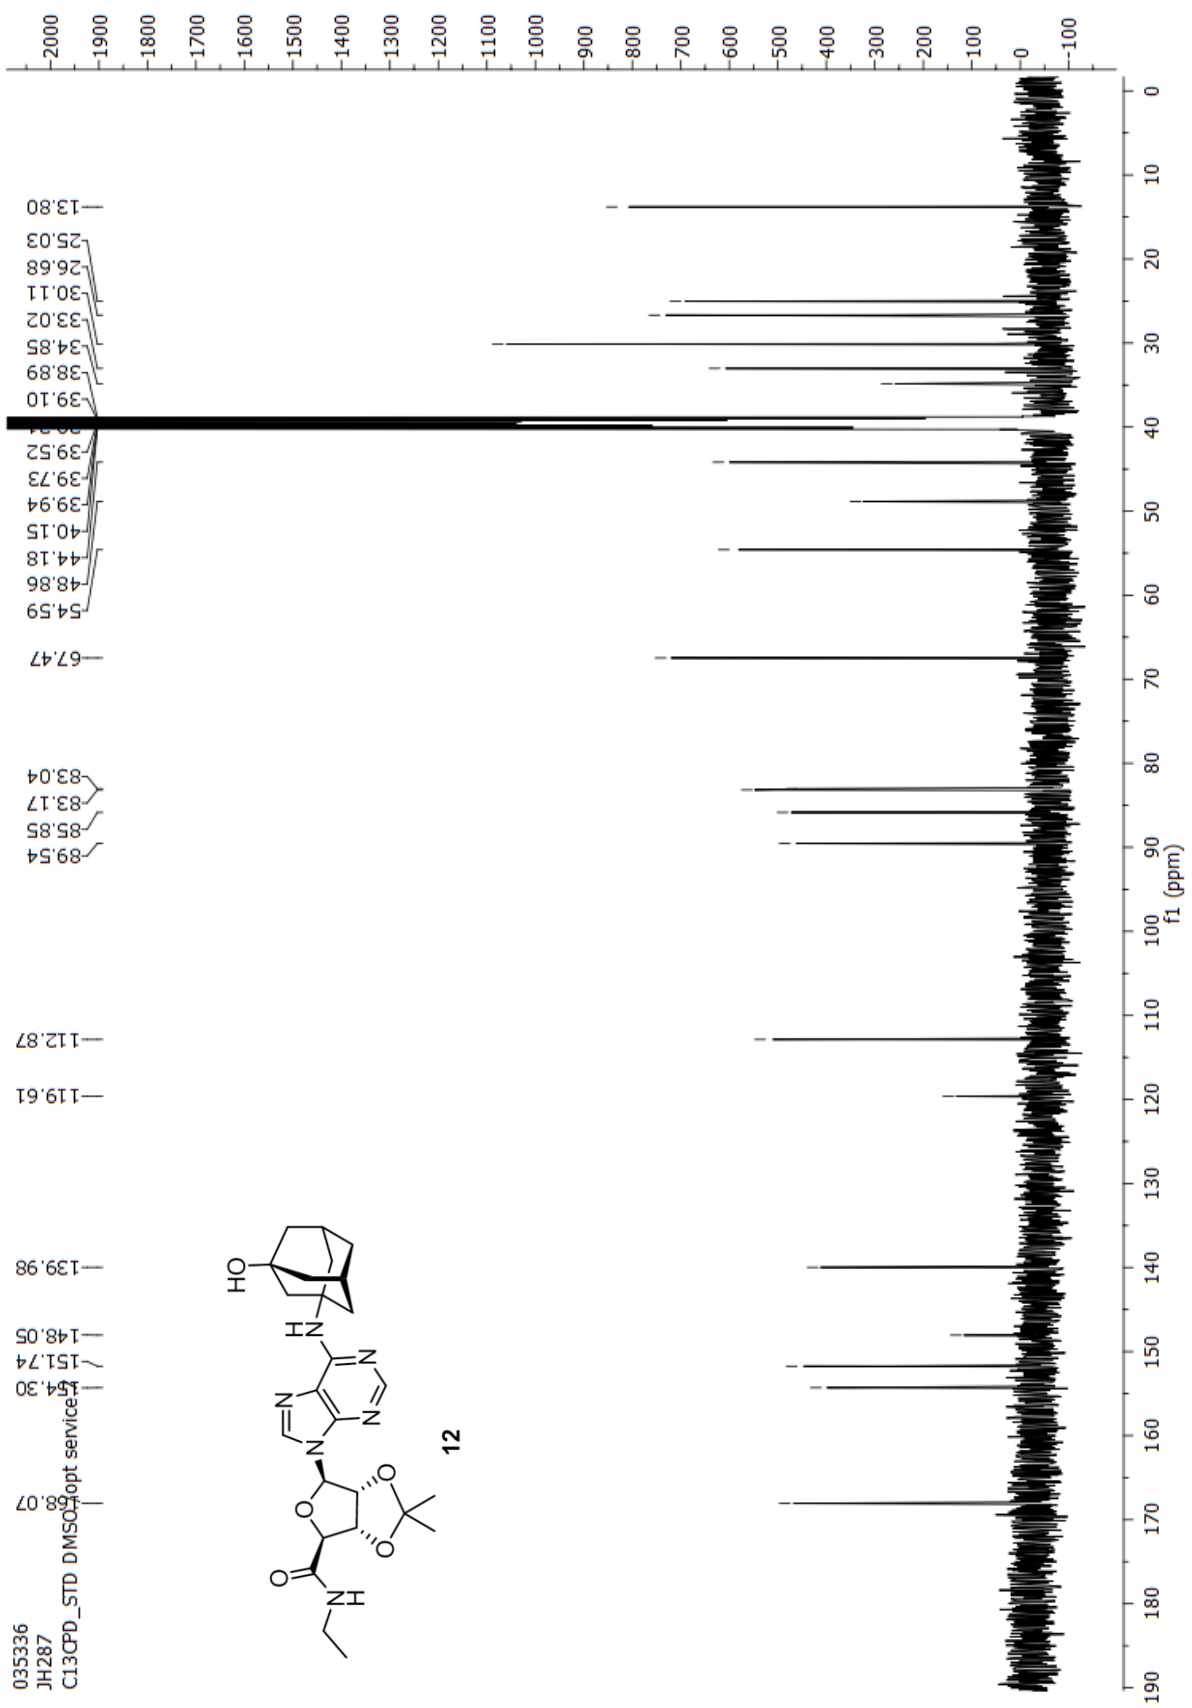

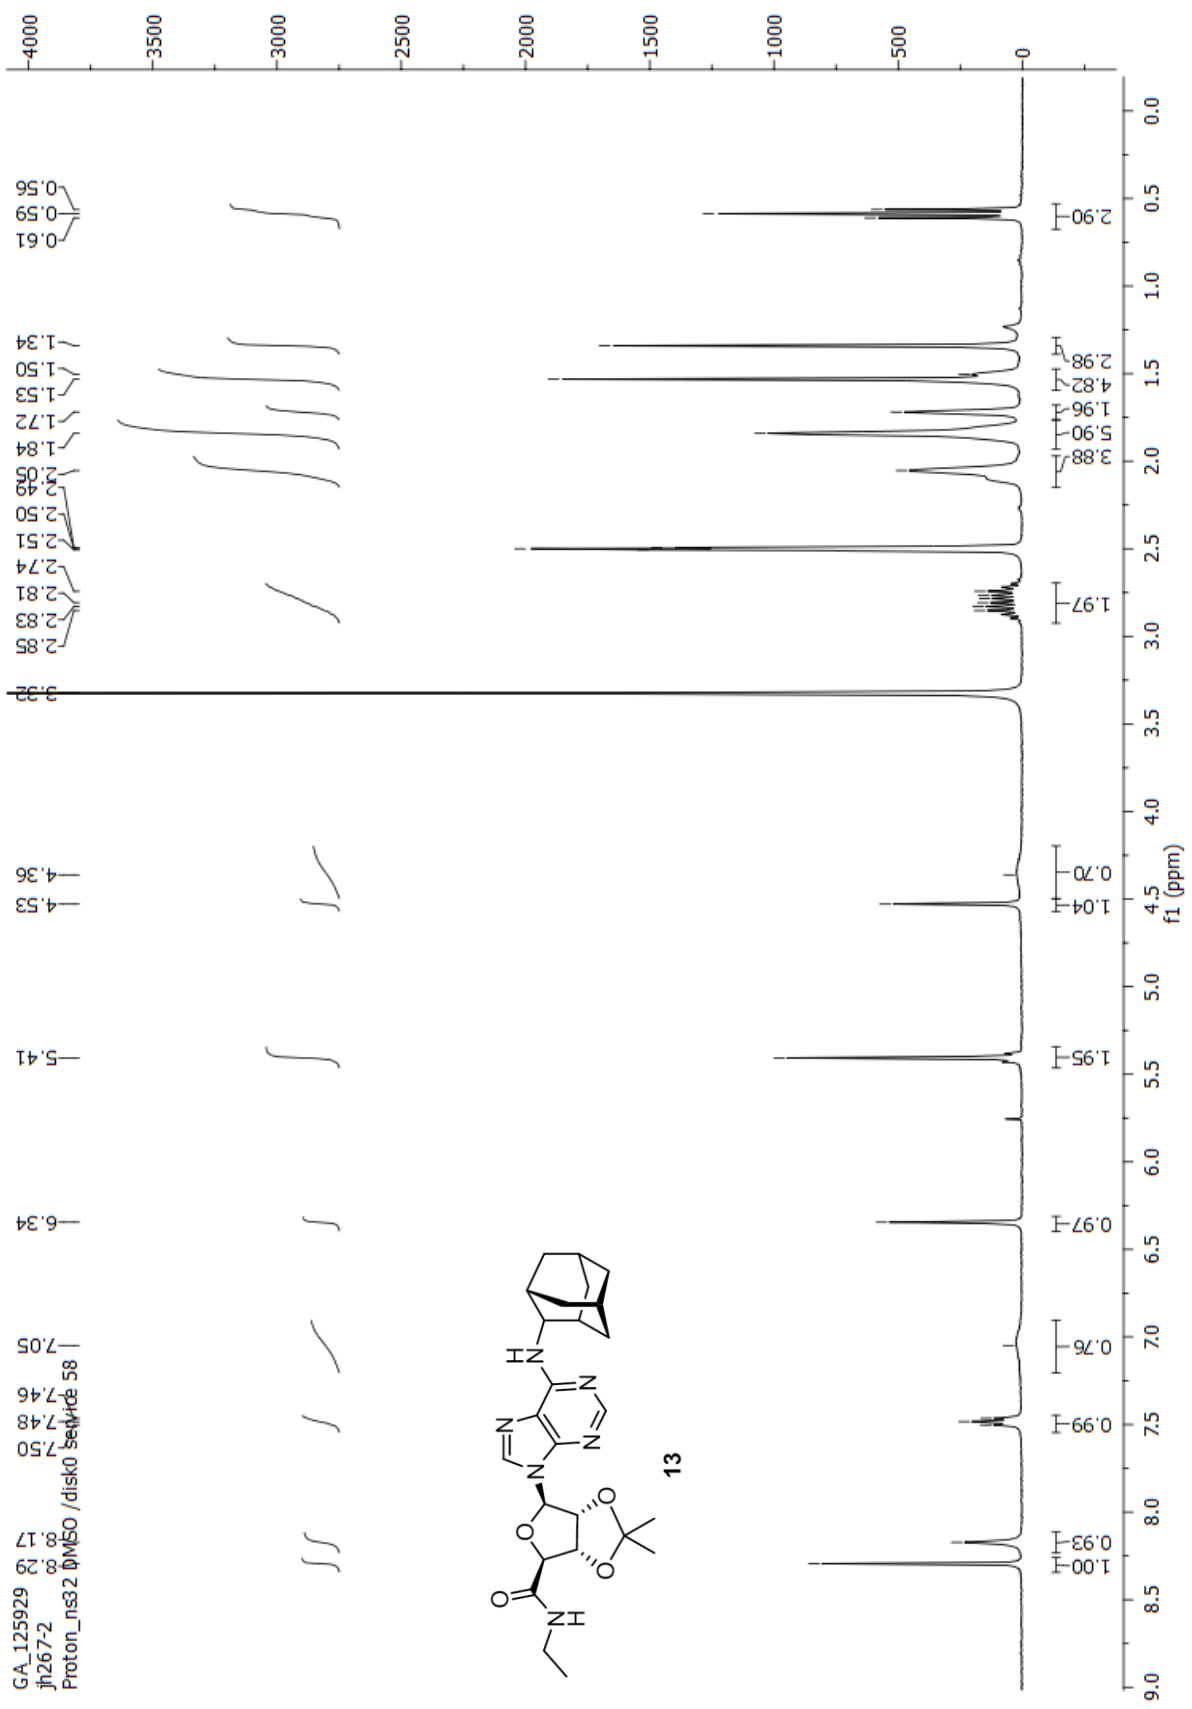

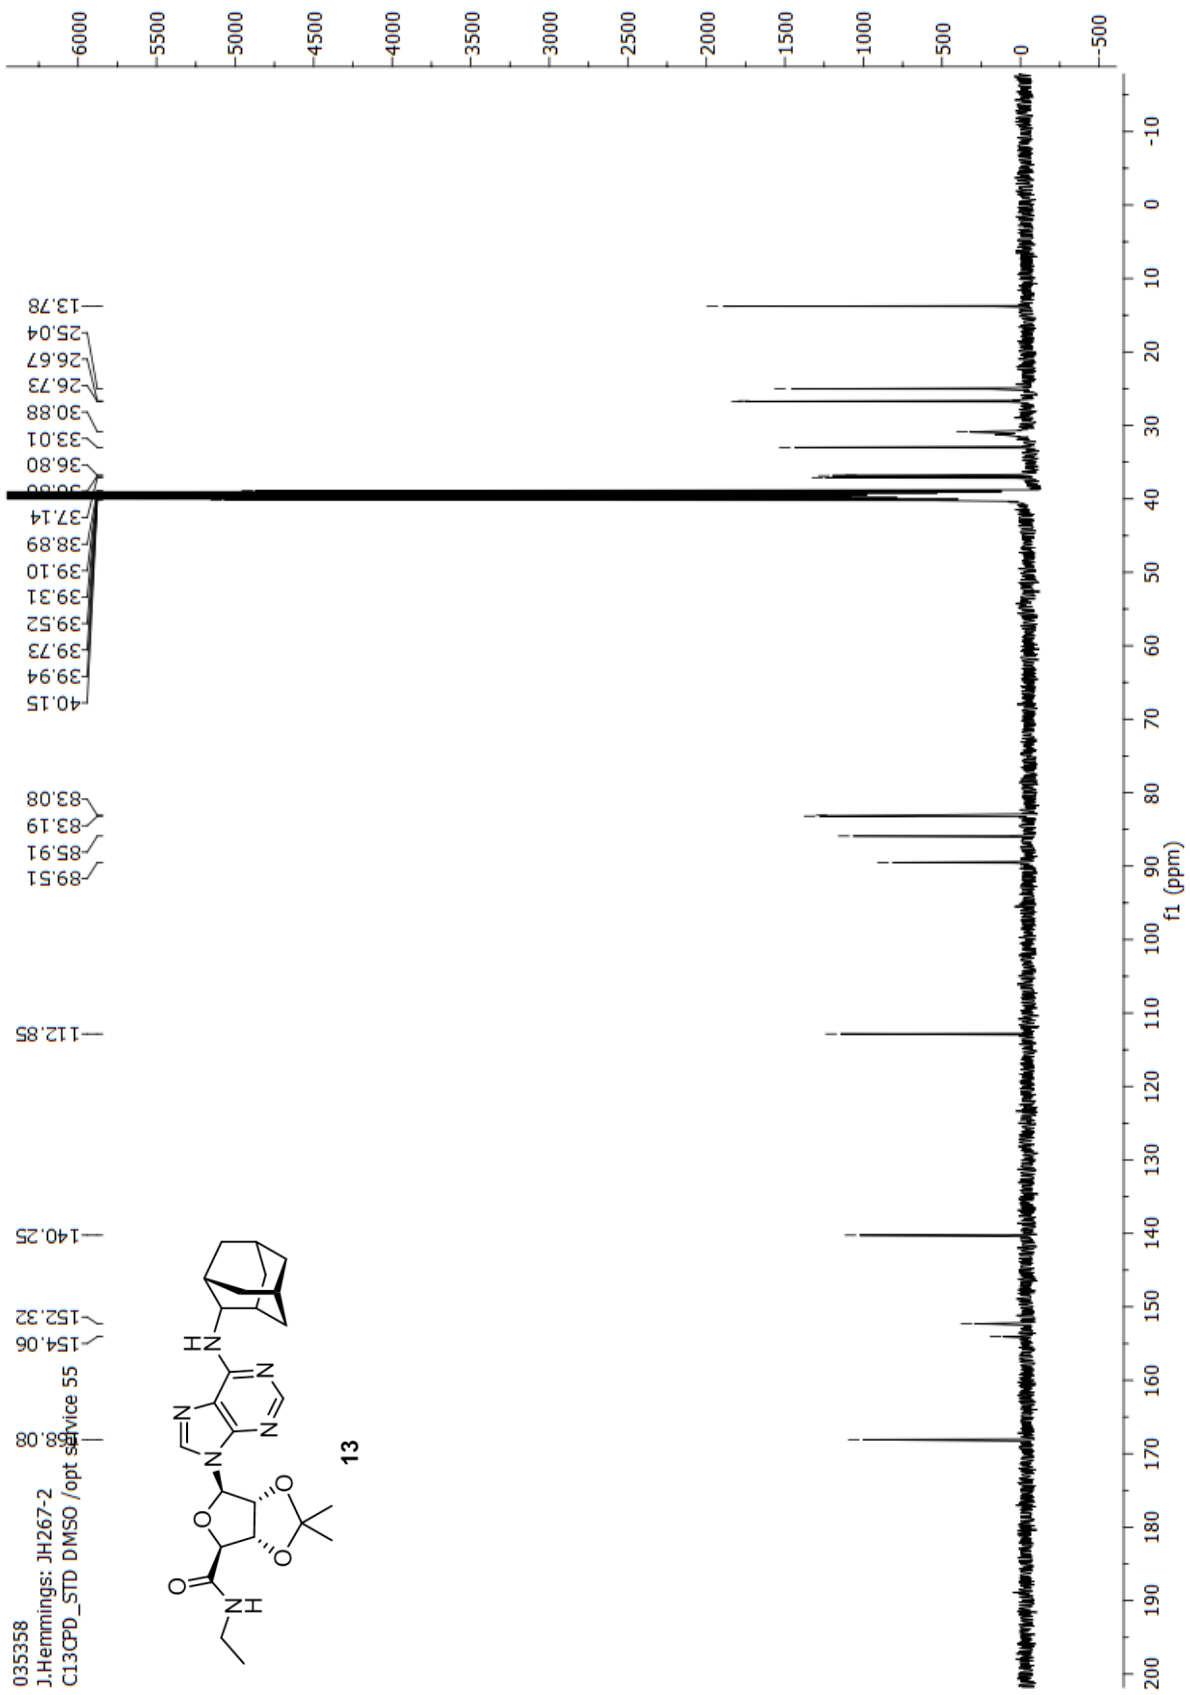

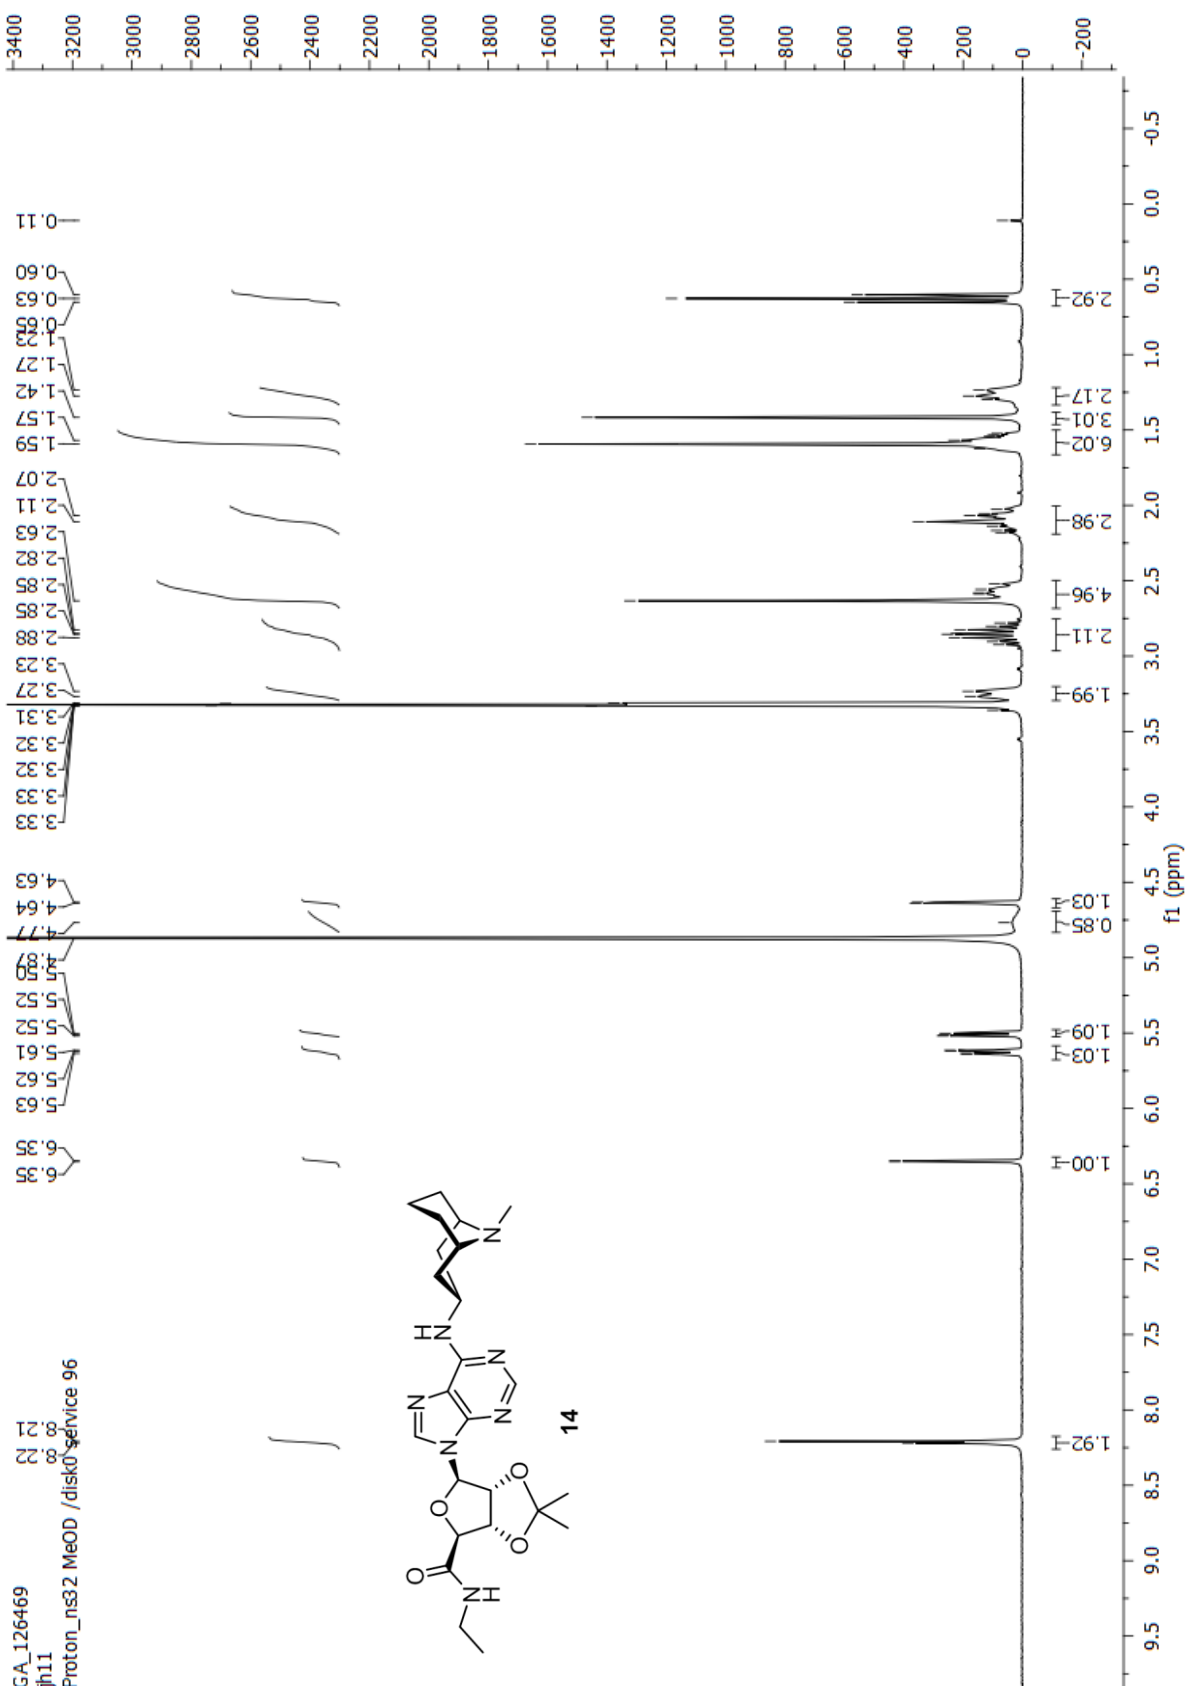

GA\_126469  
jh11  
Proton\_ns32 MeOD / disk0 service 96



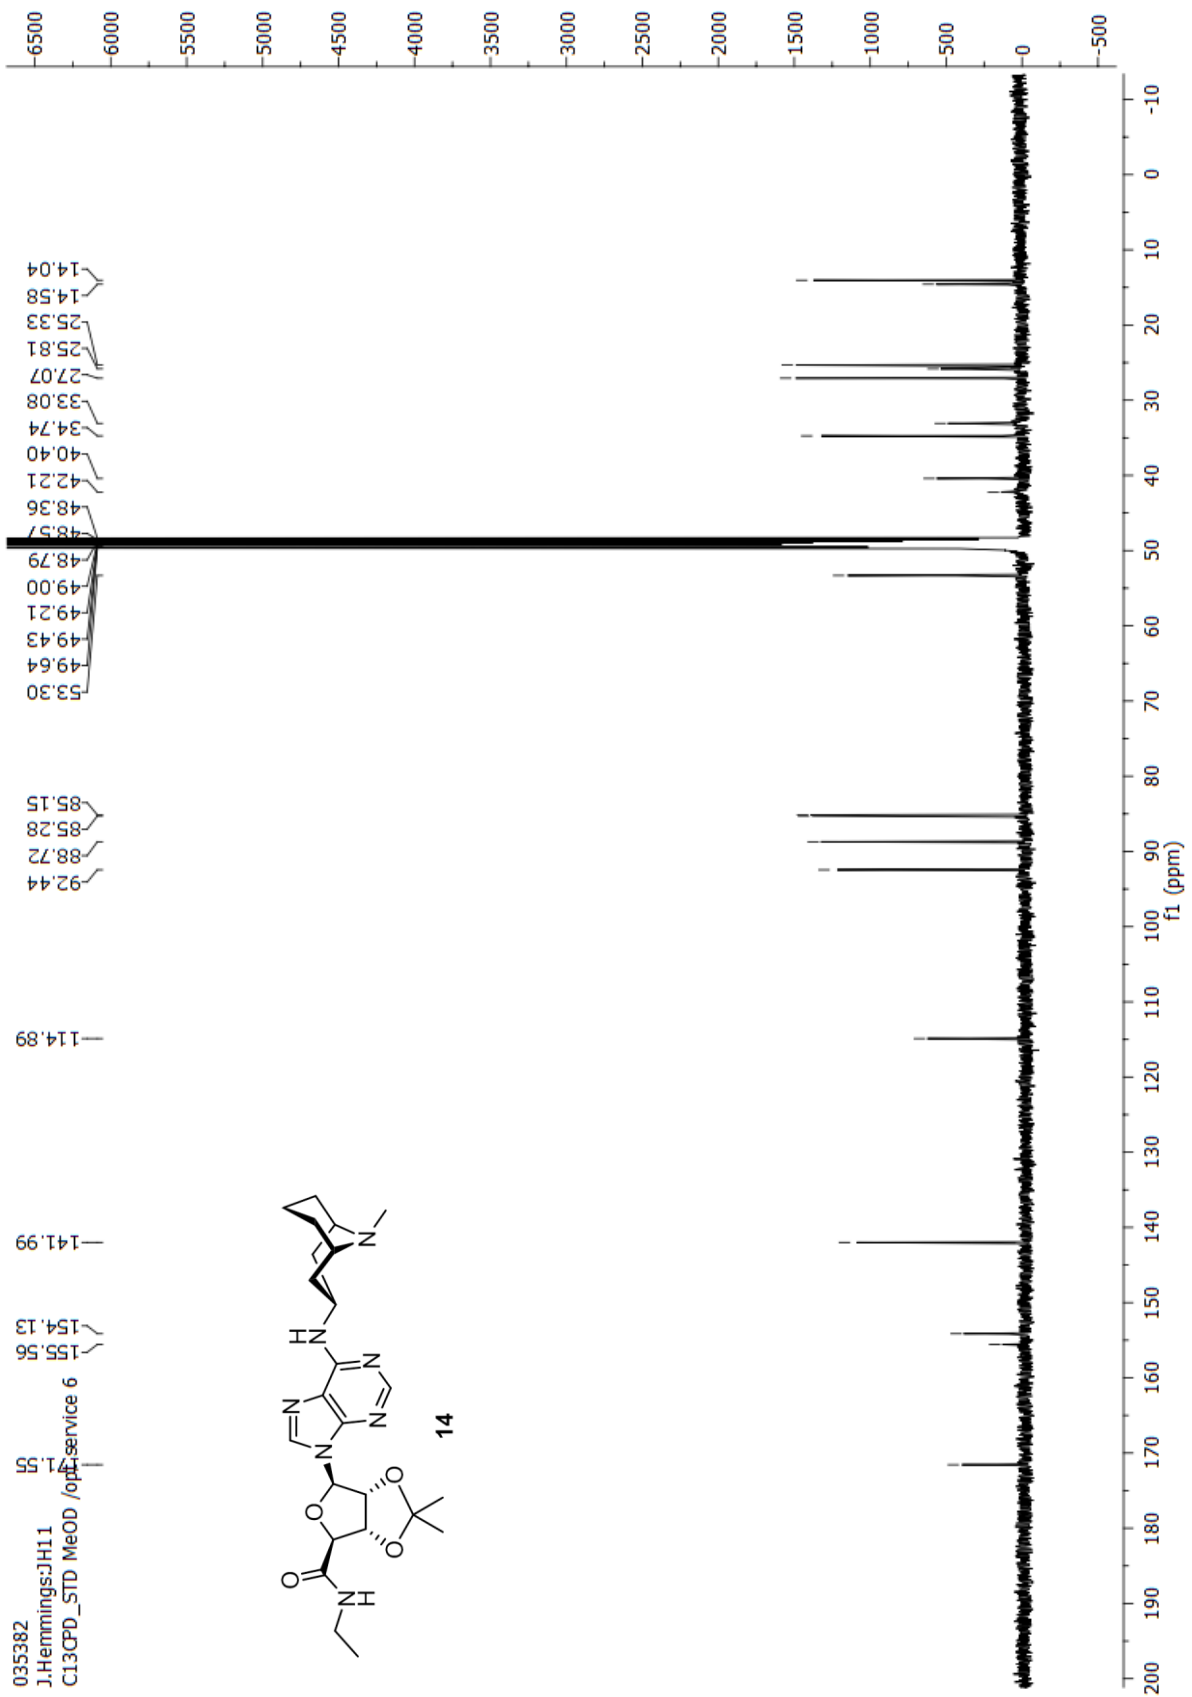

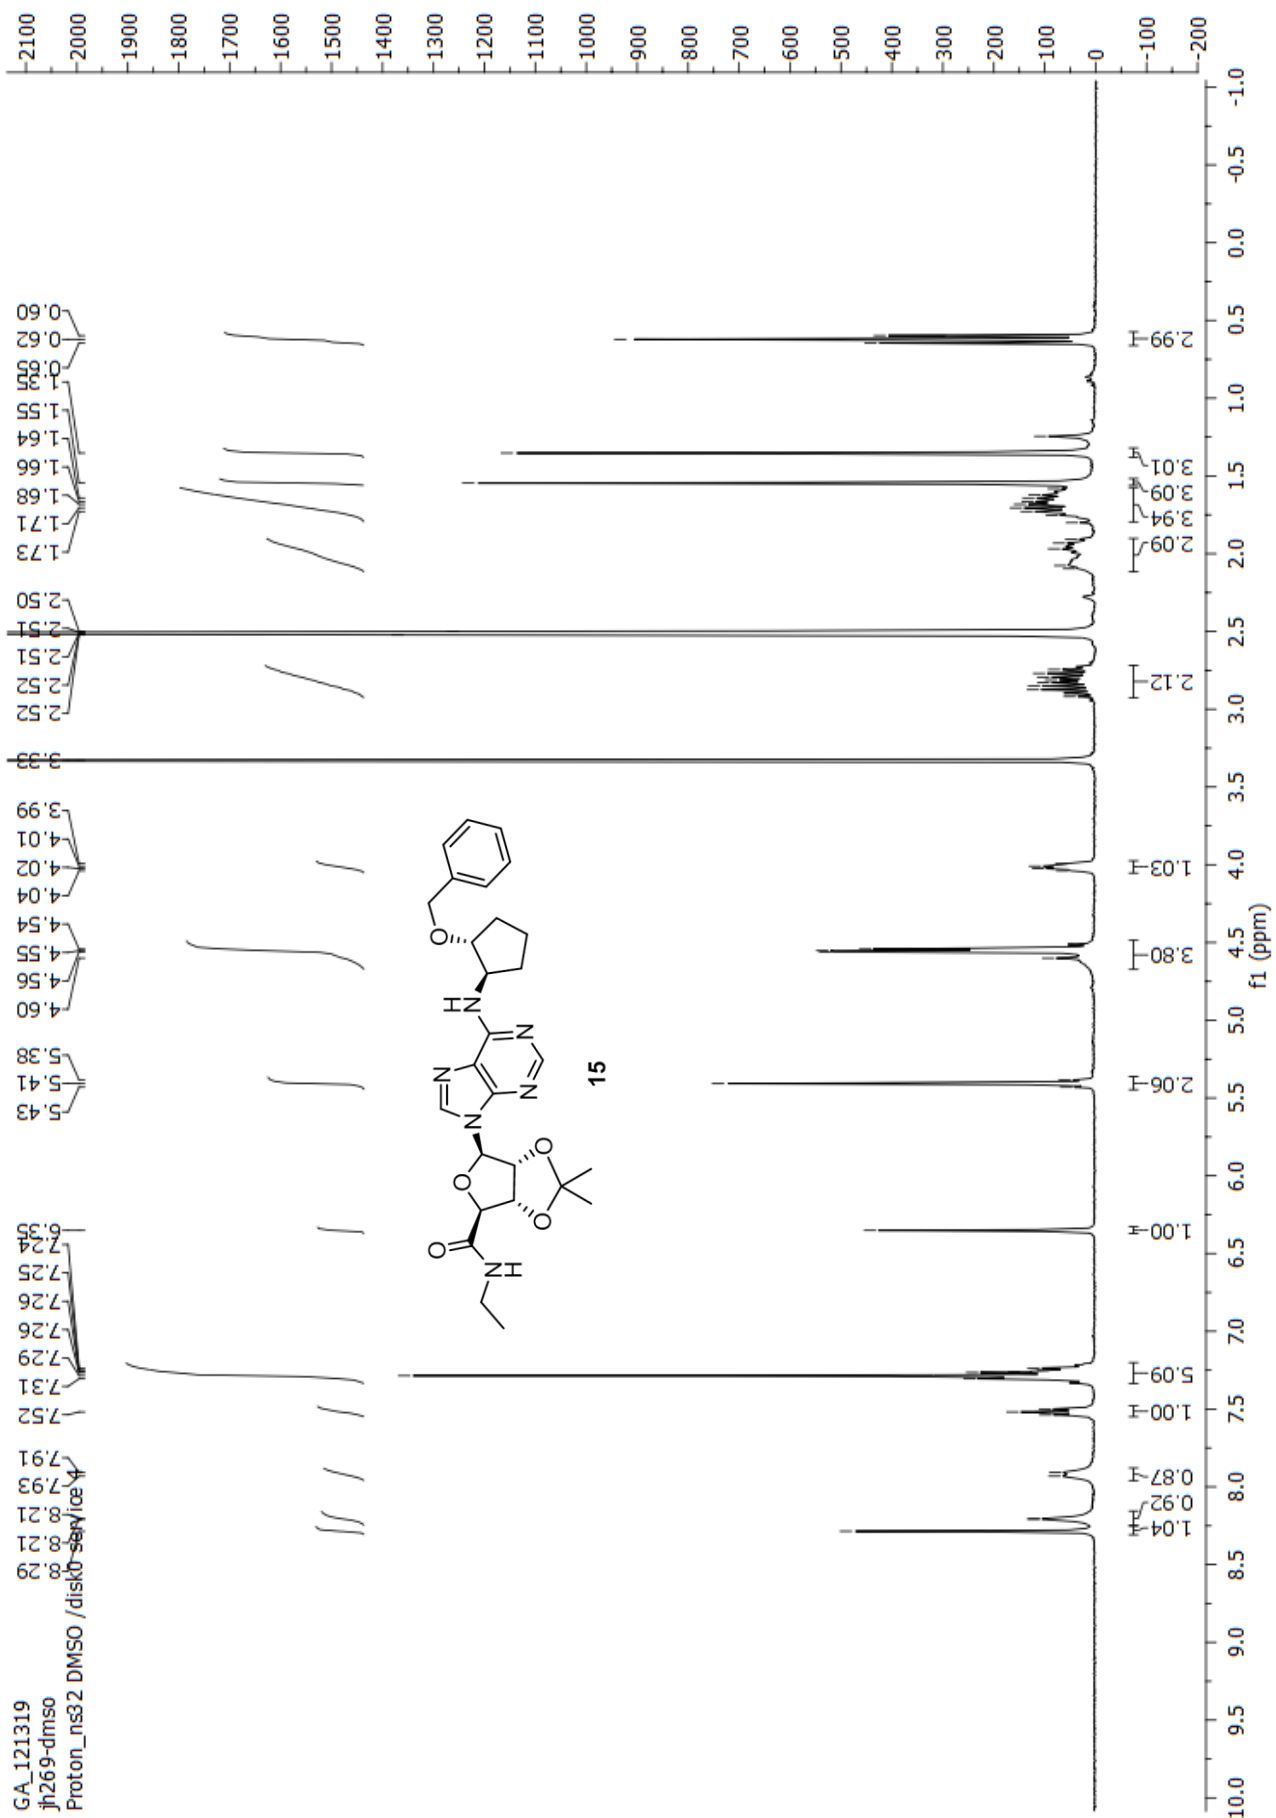

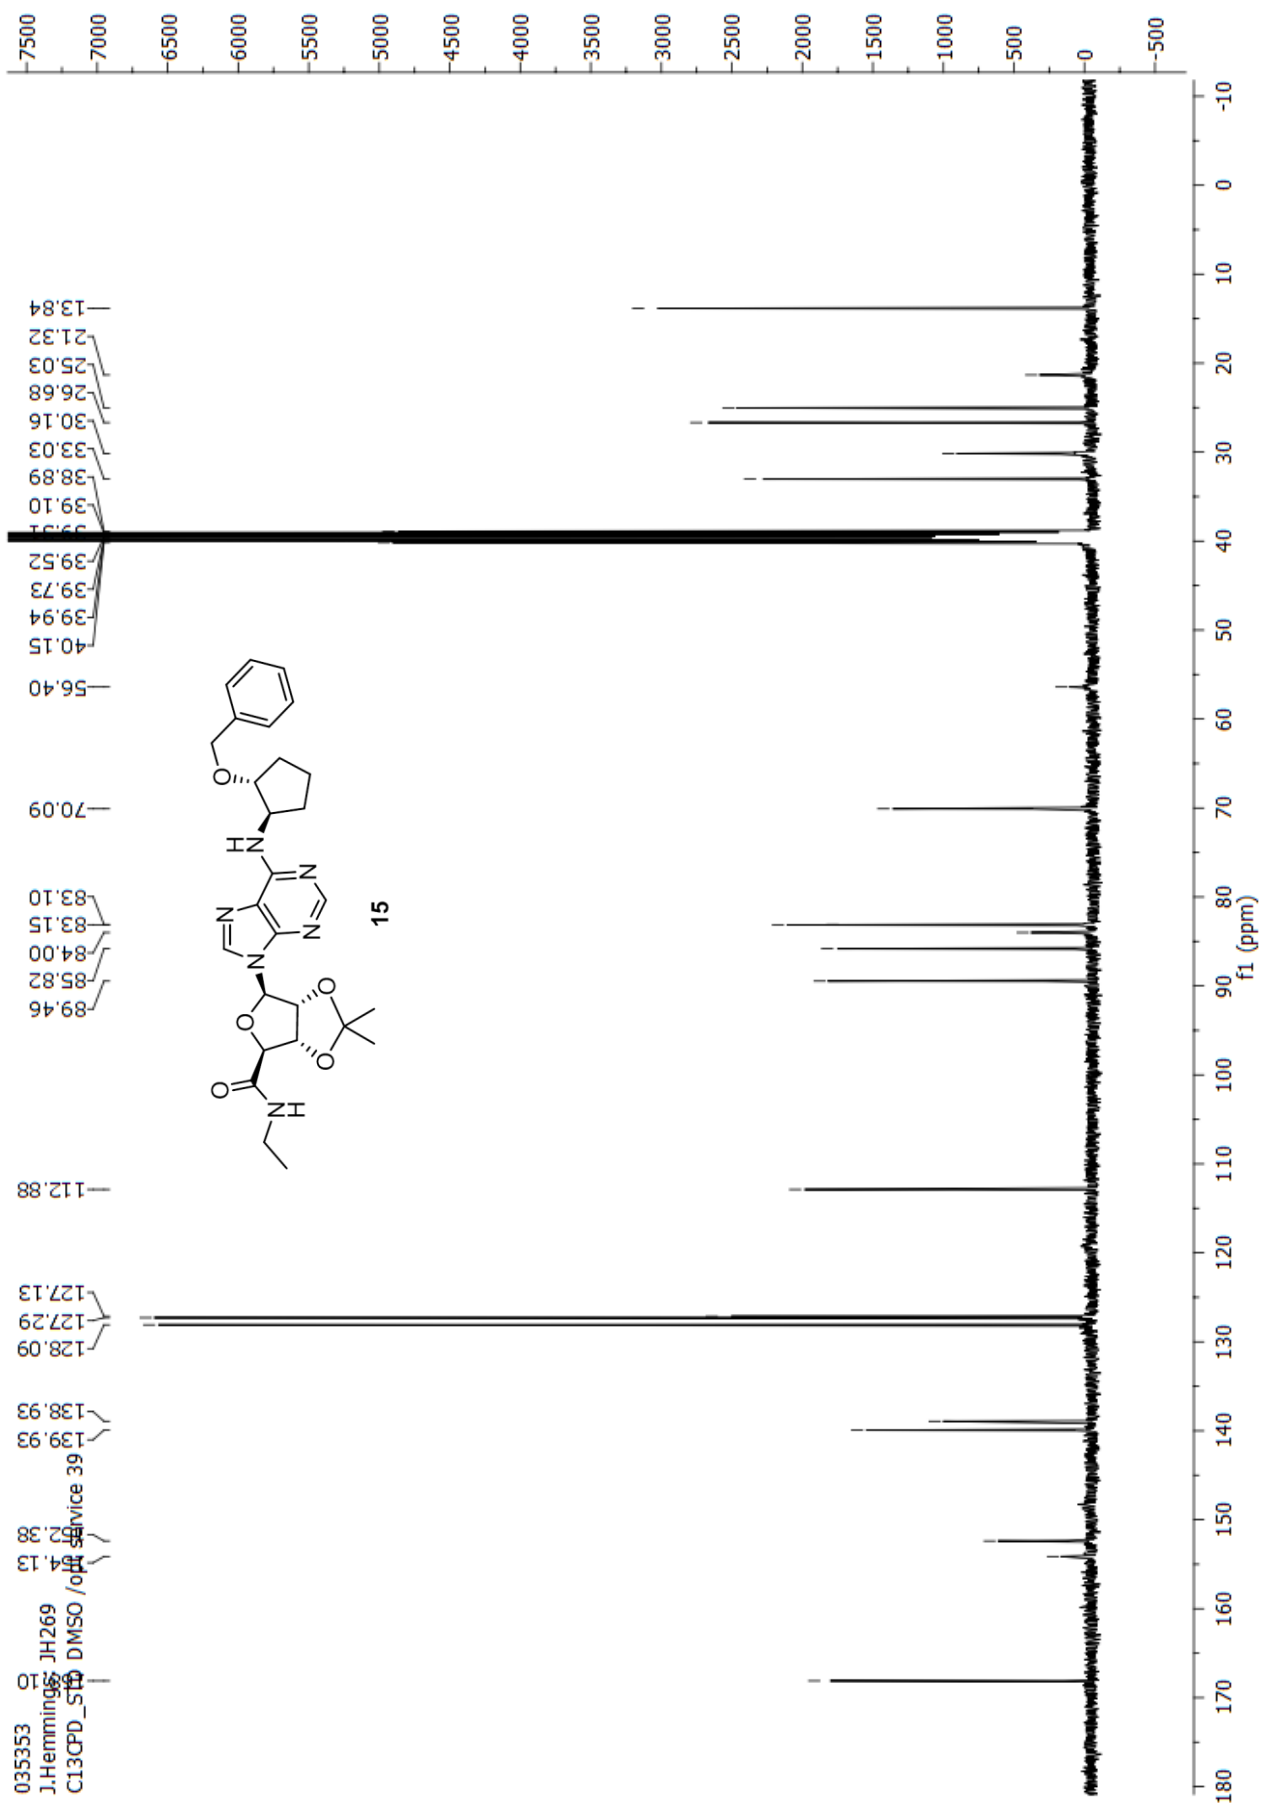

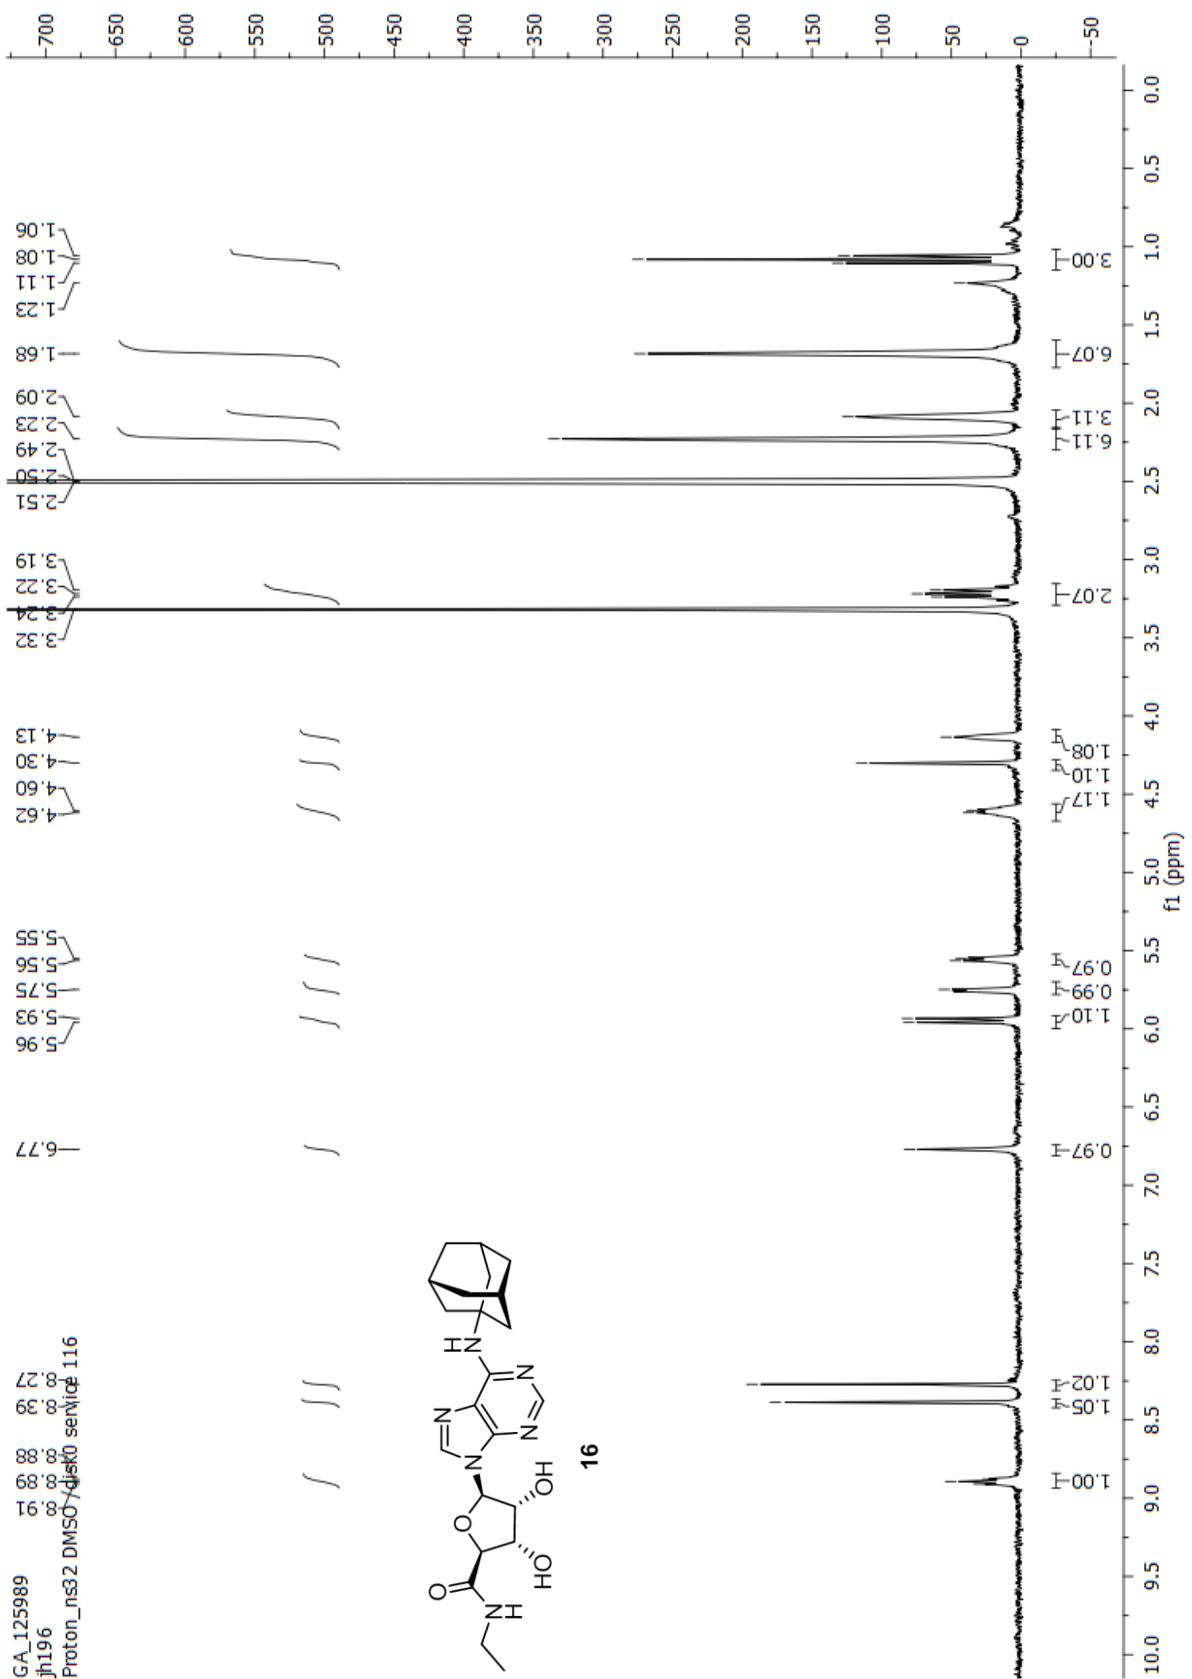

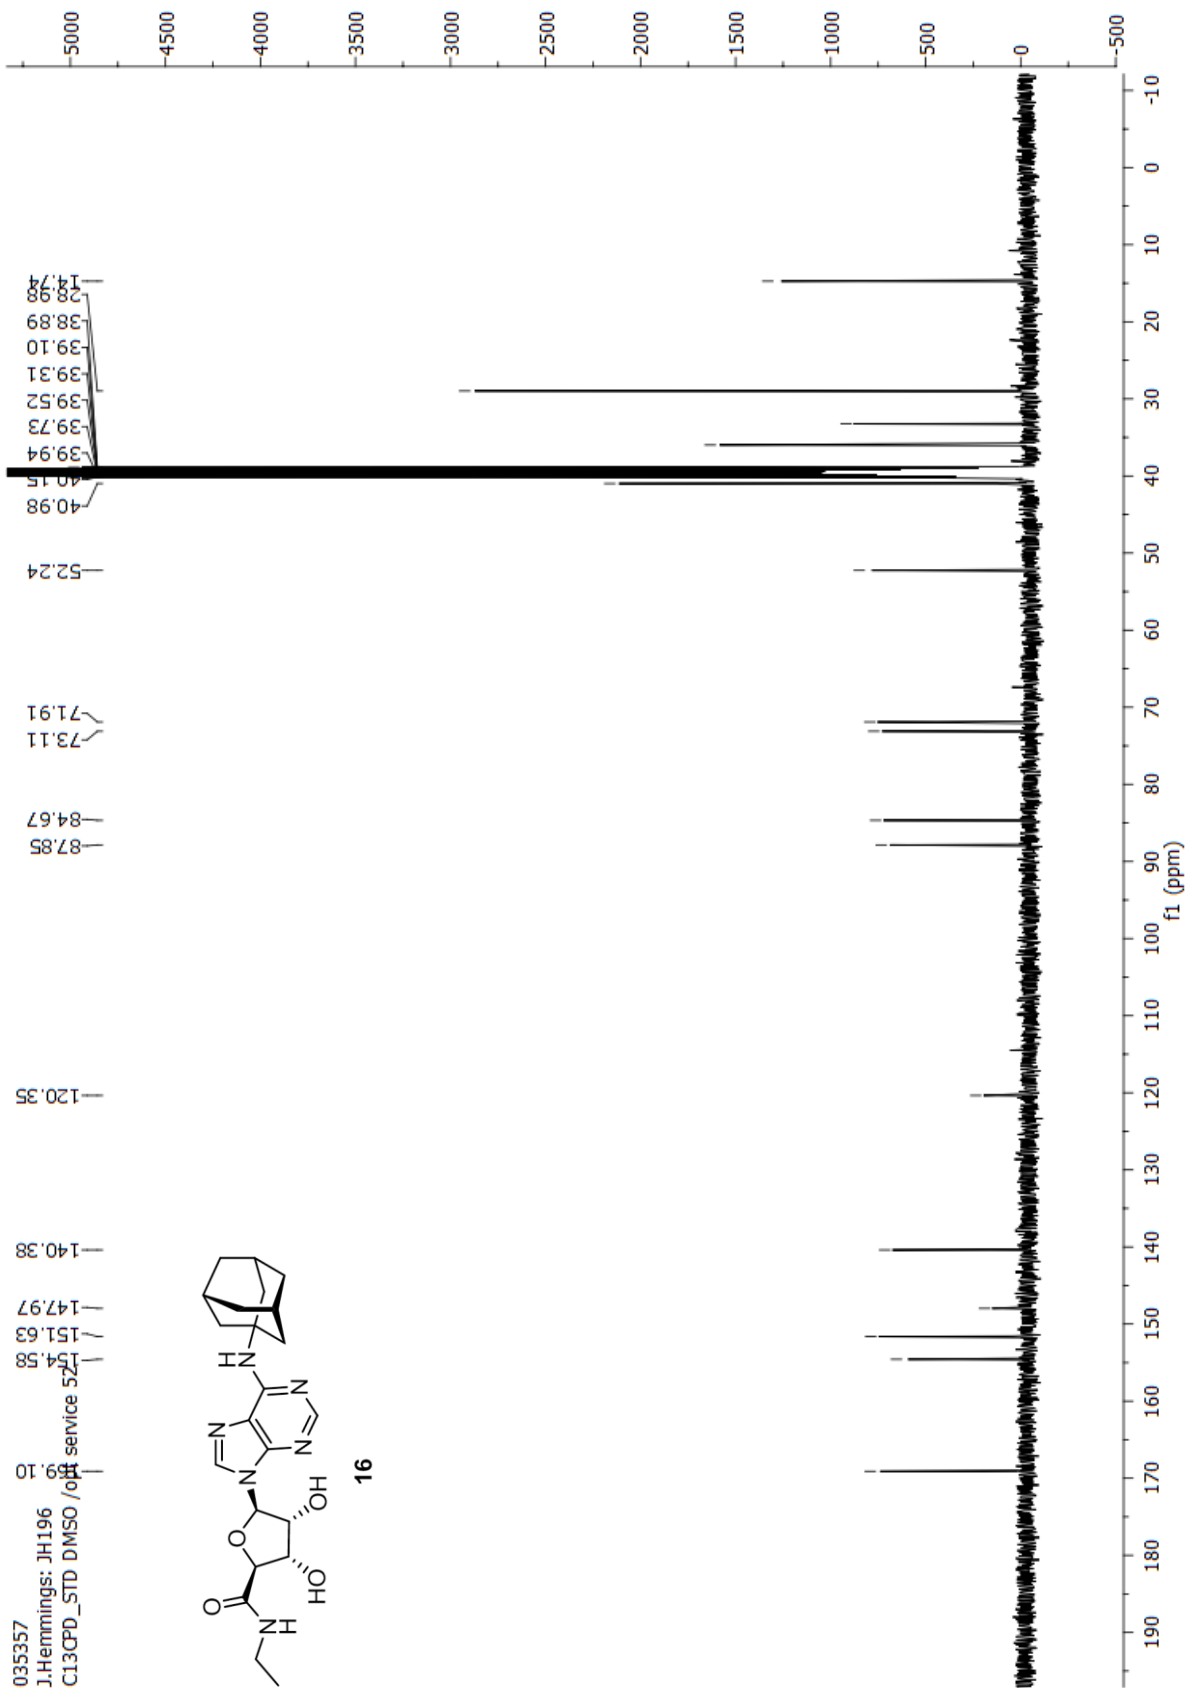

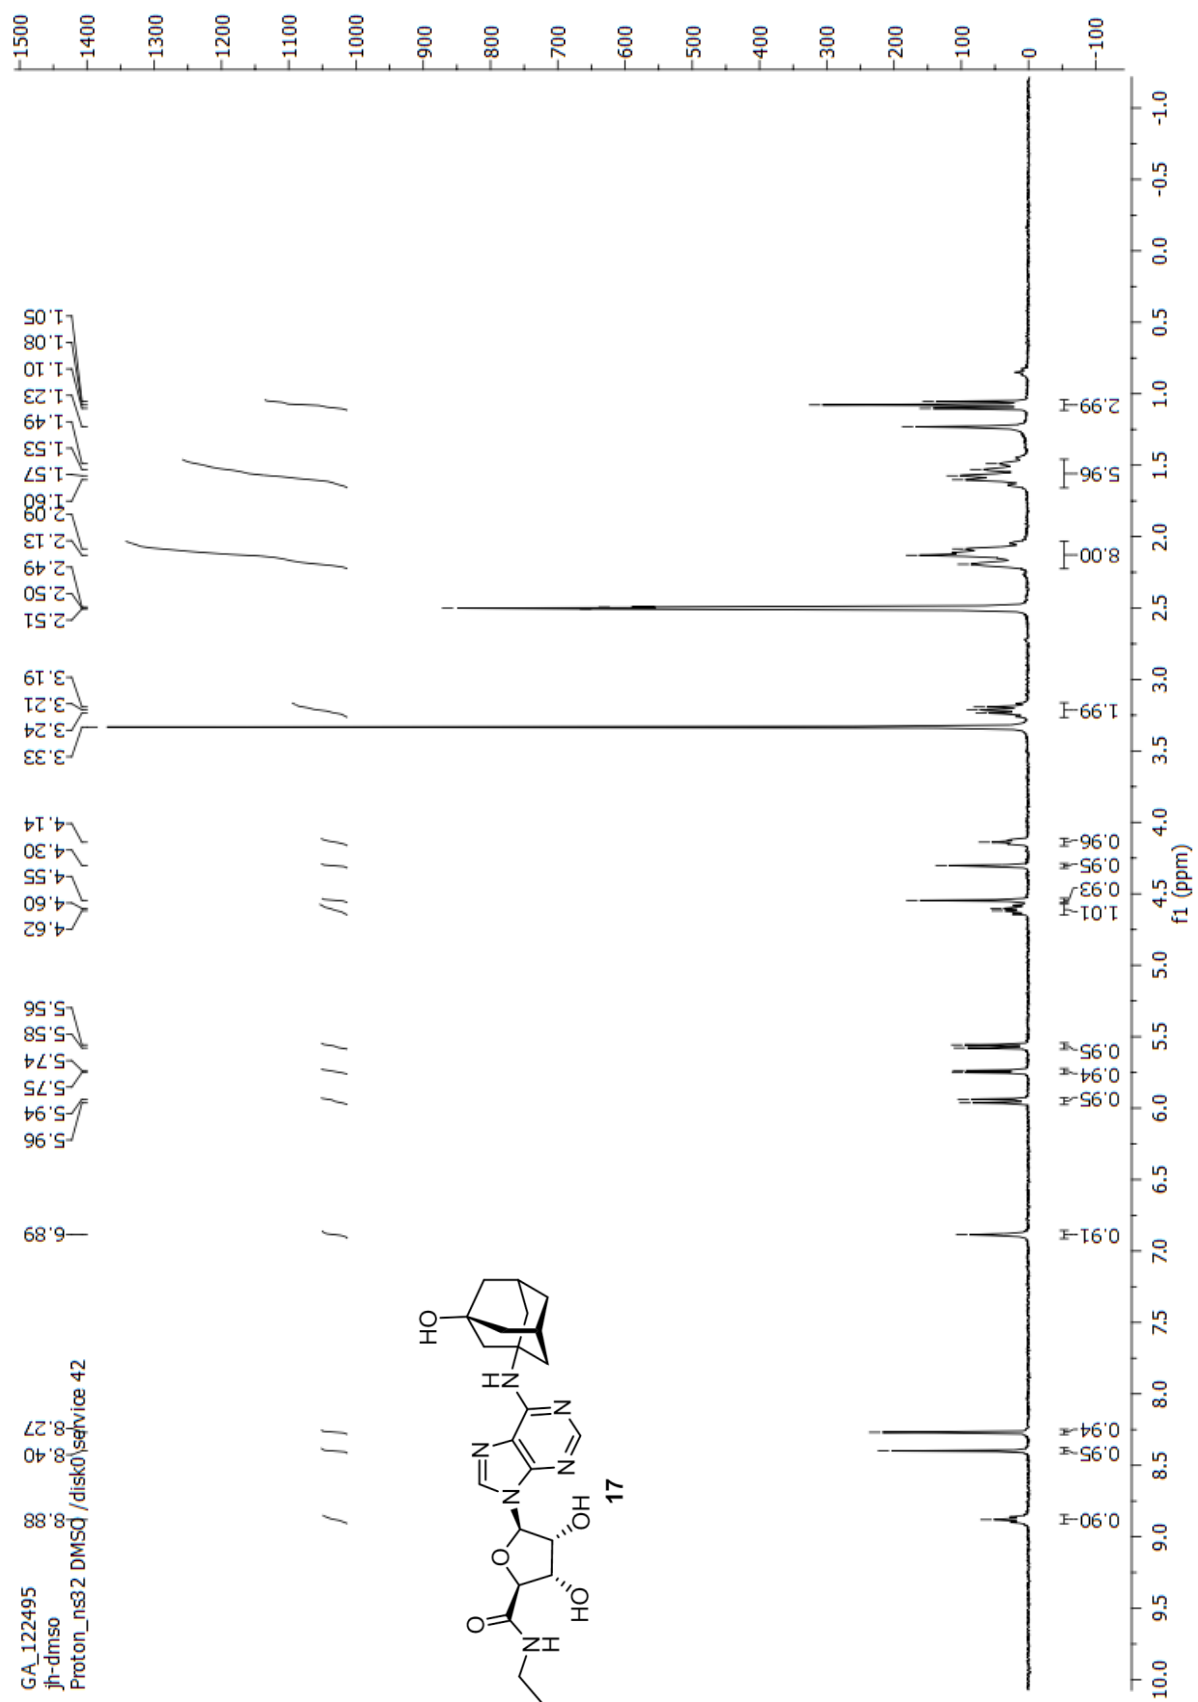

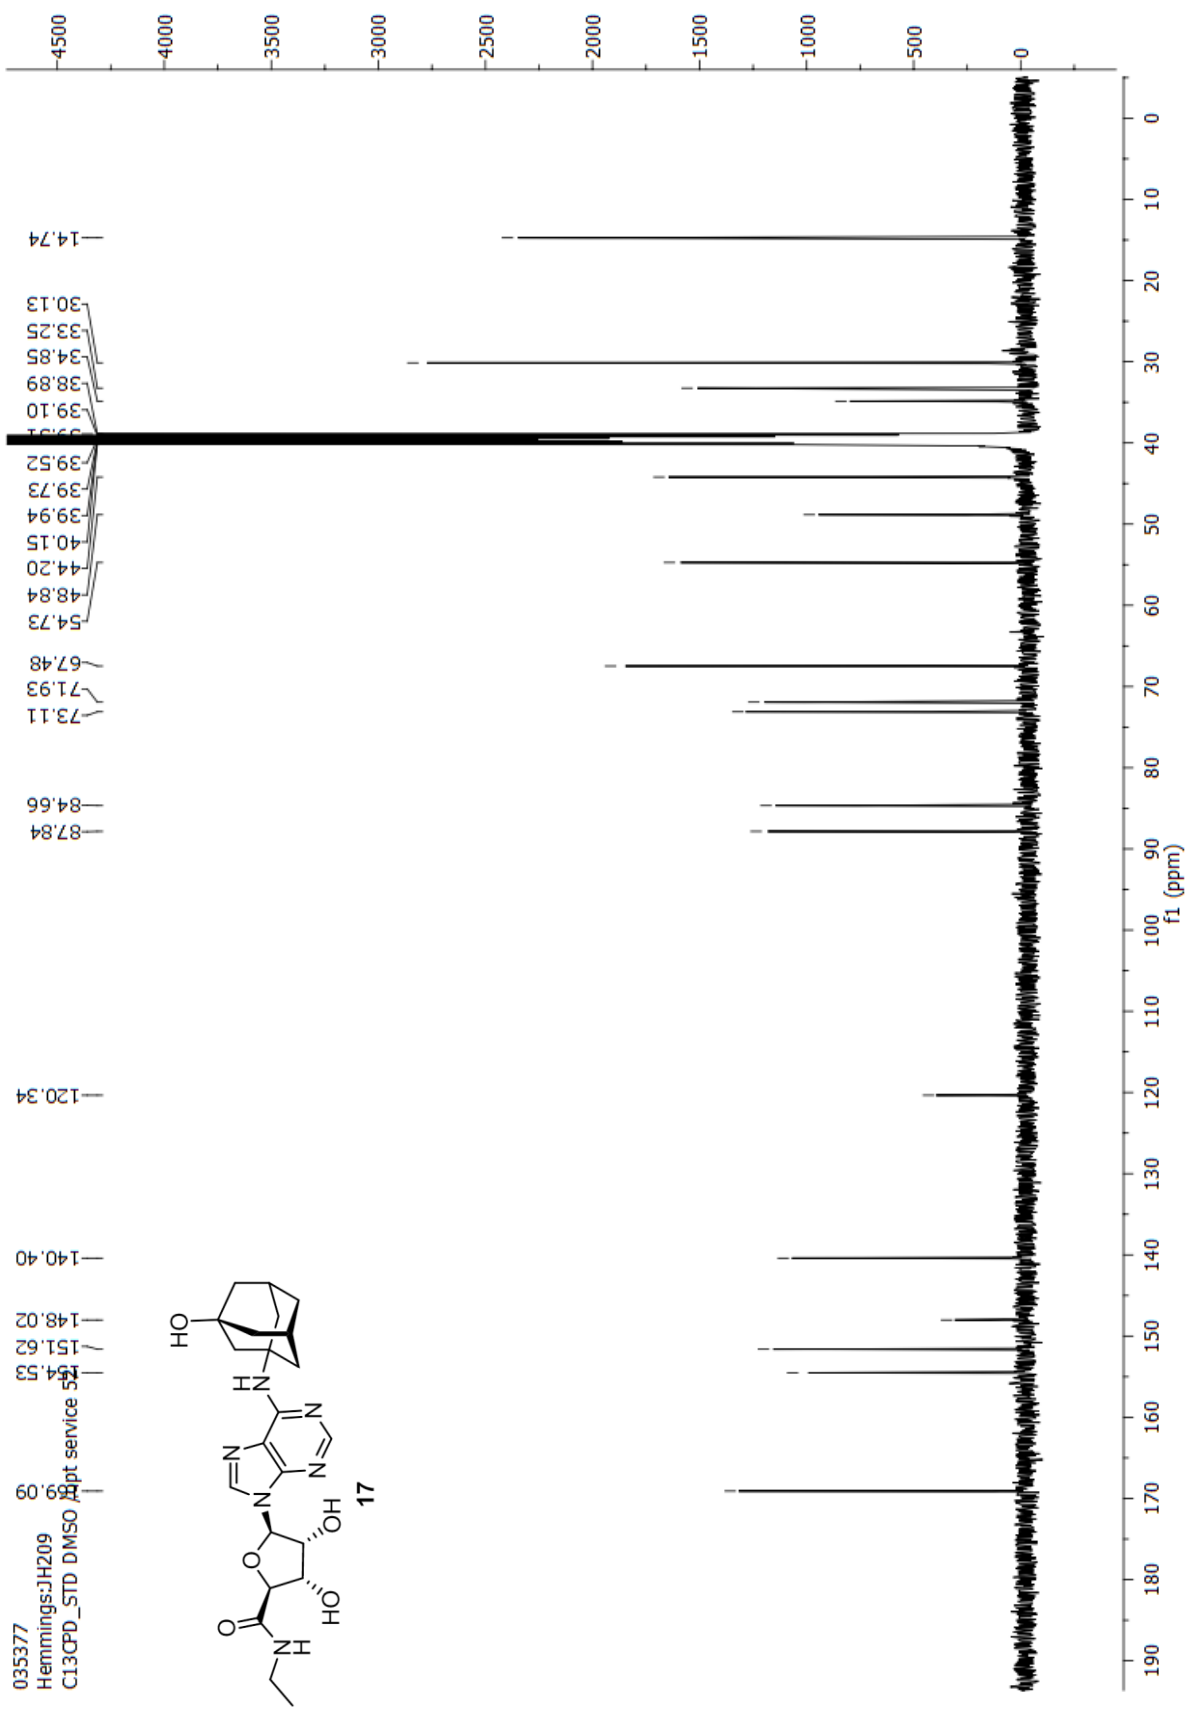

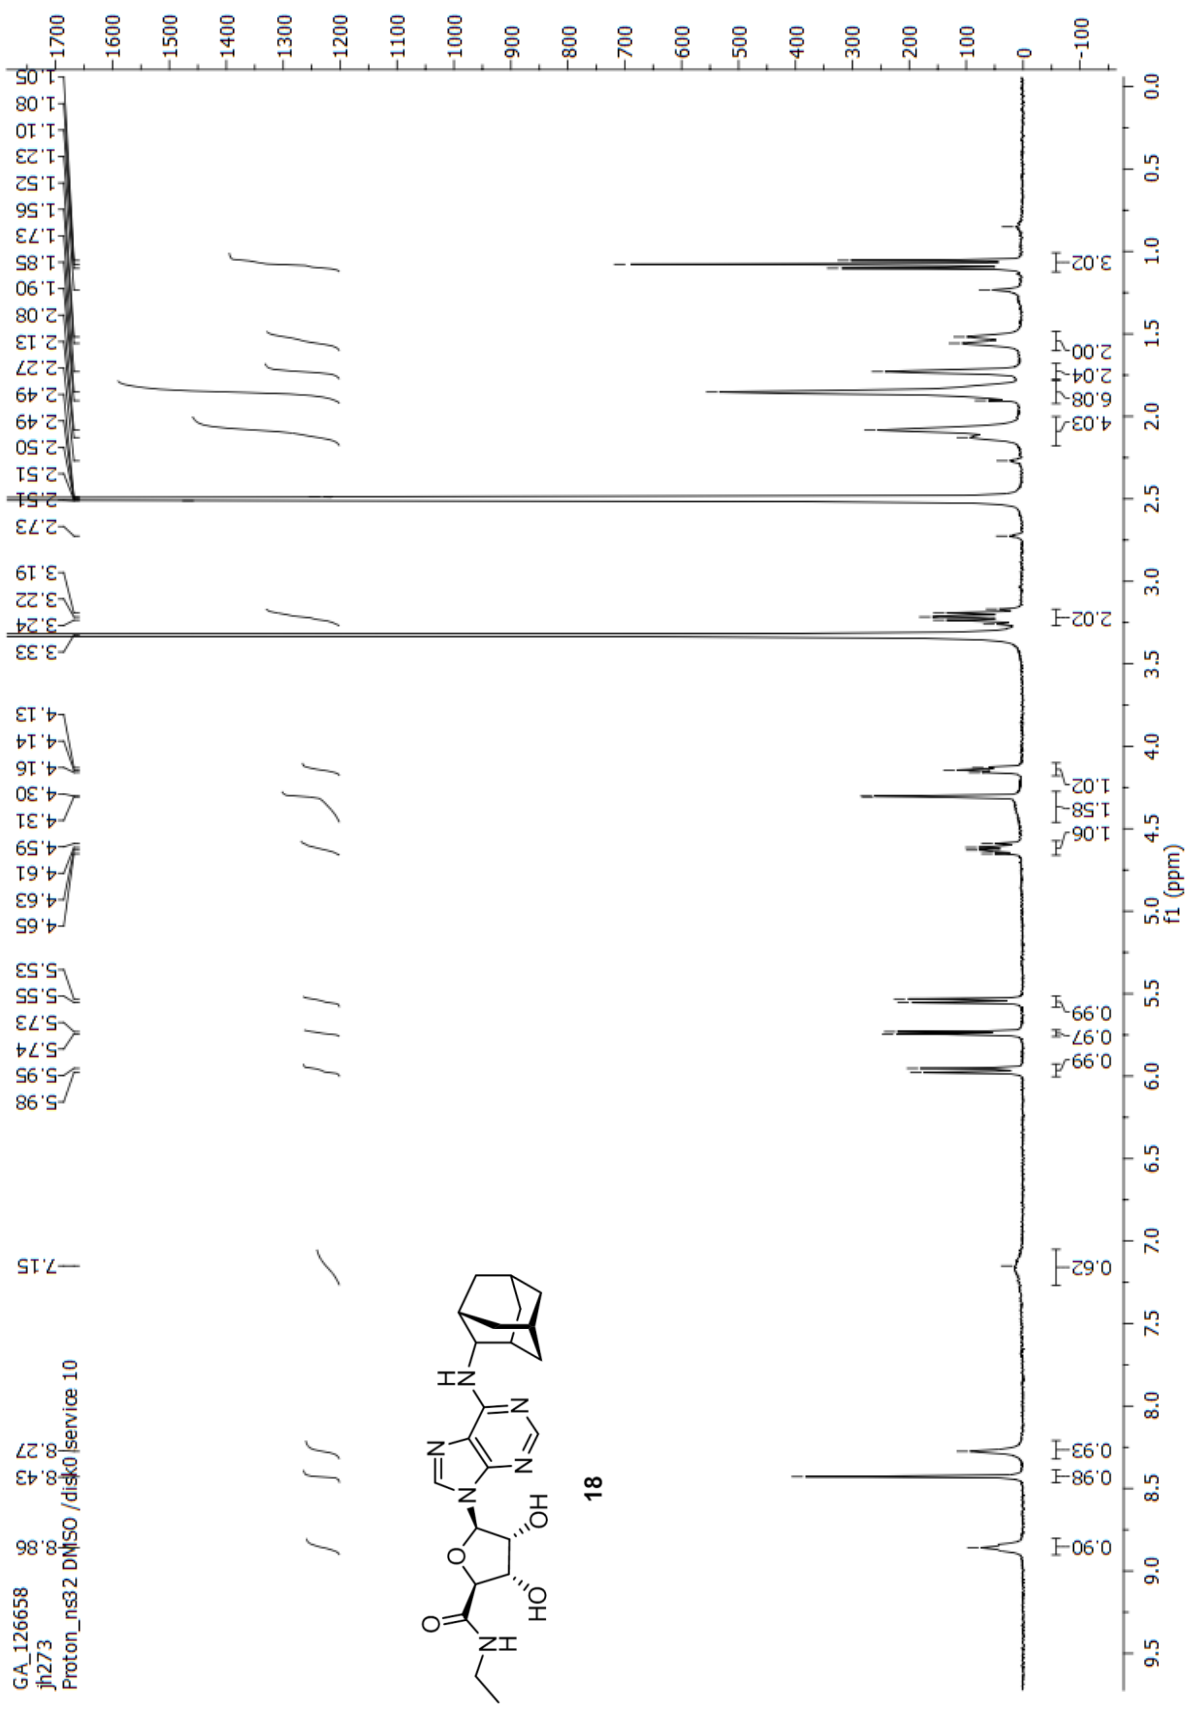



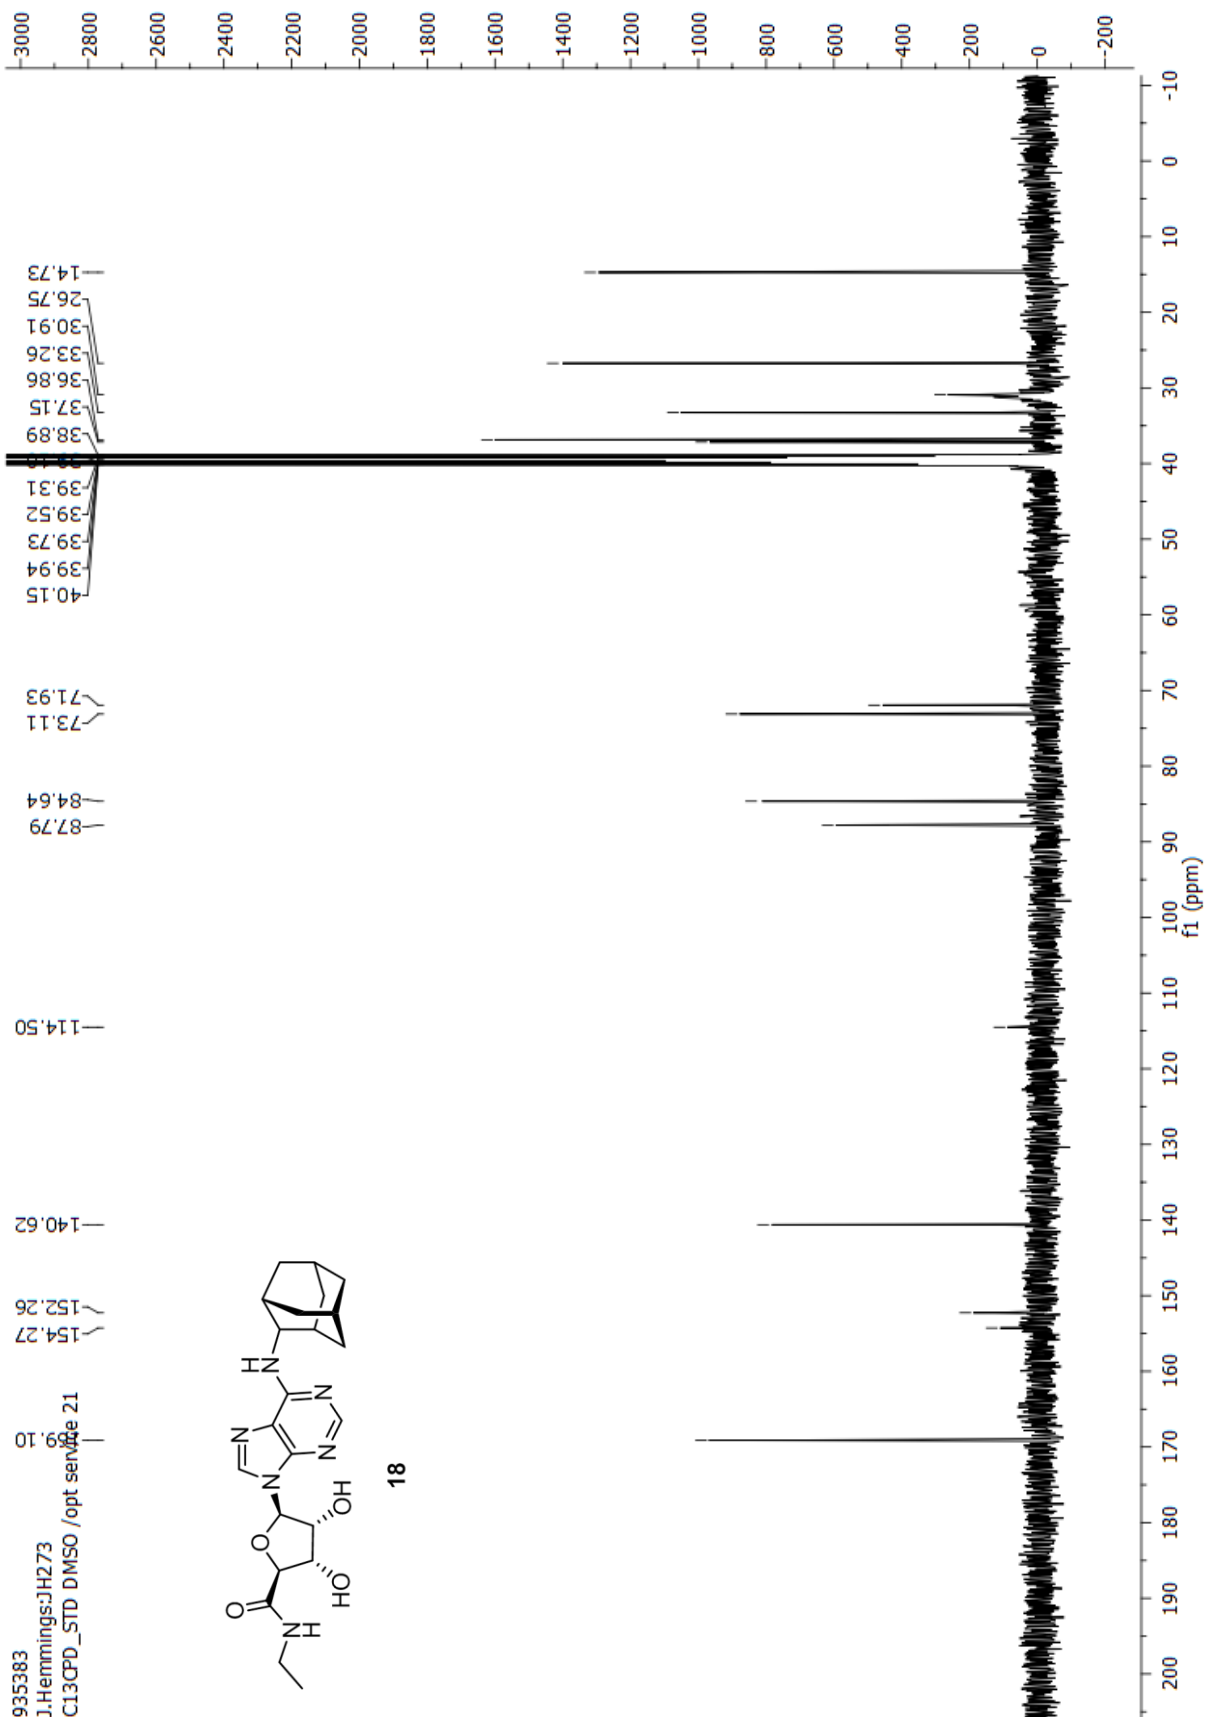

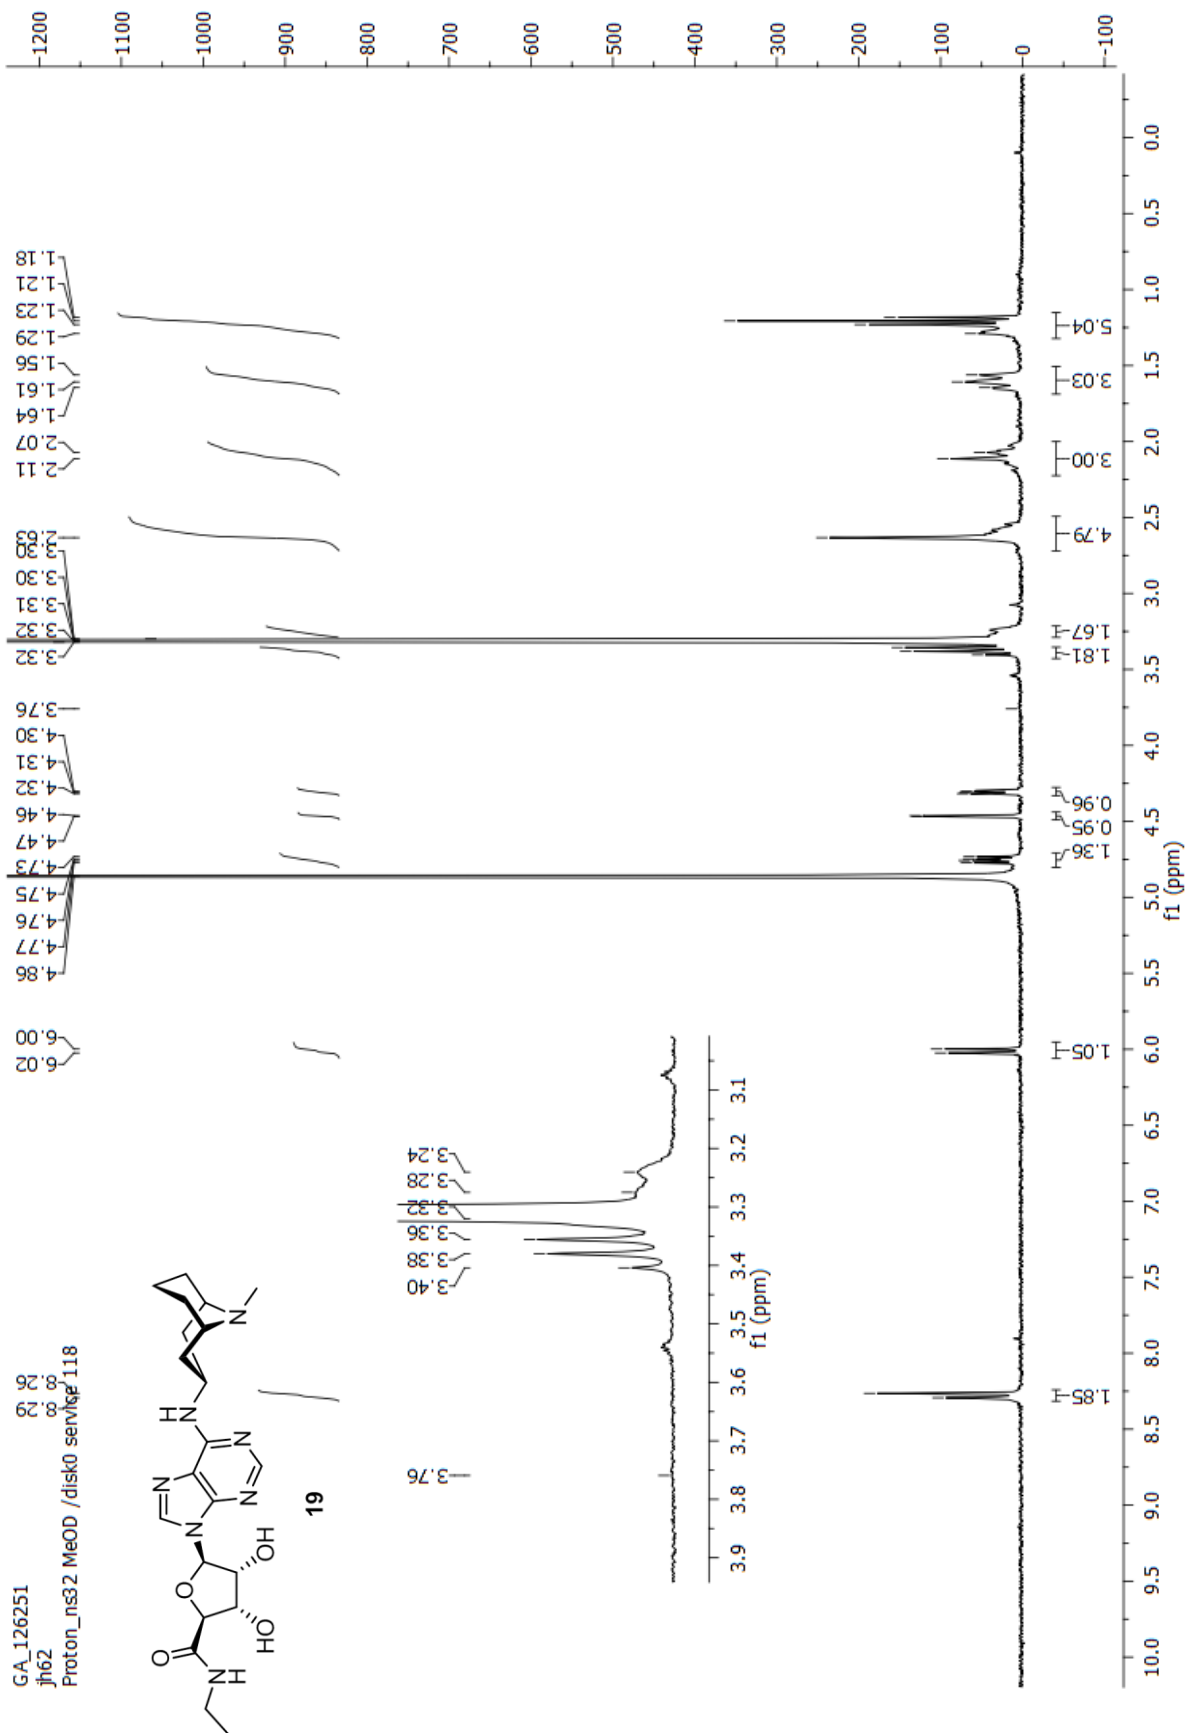

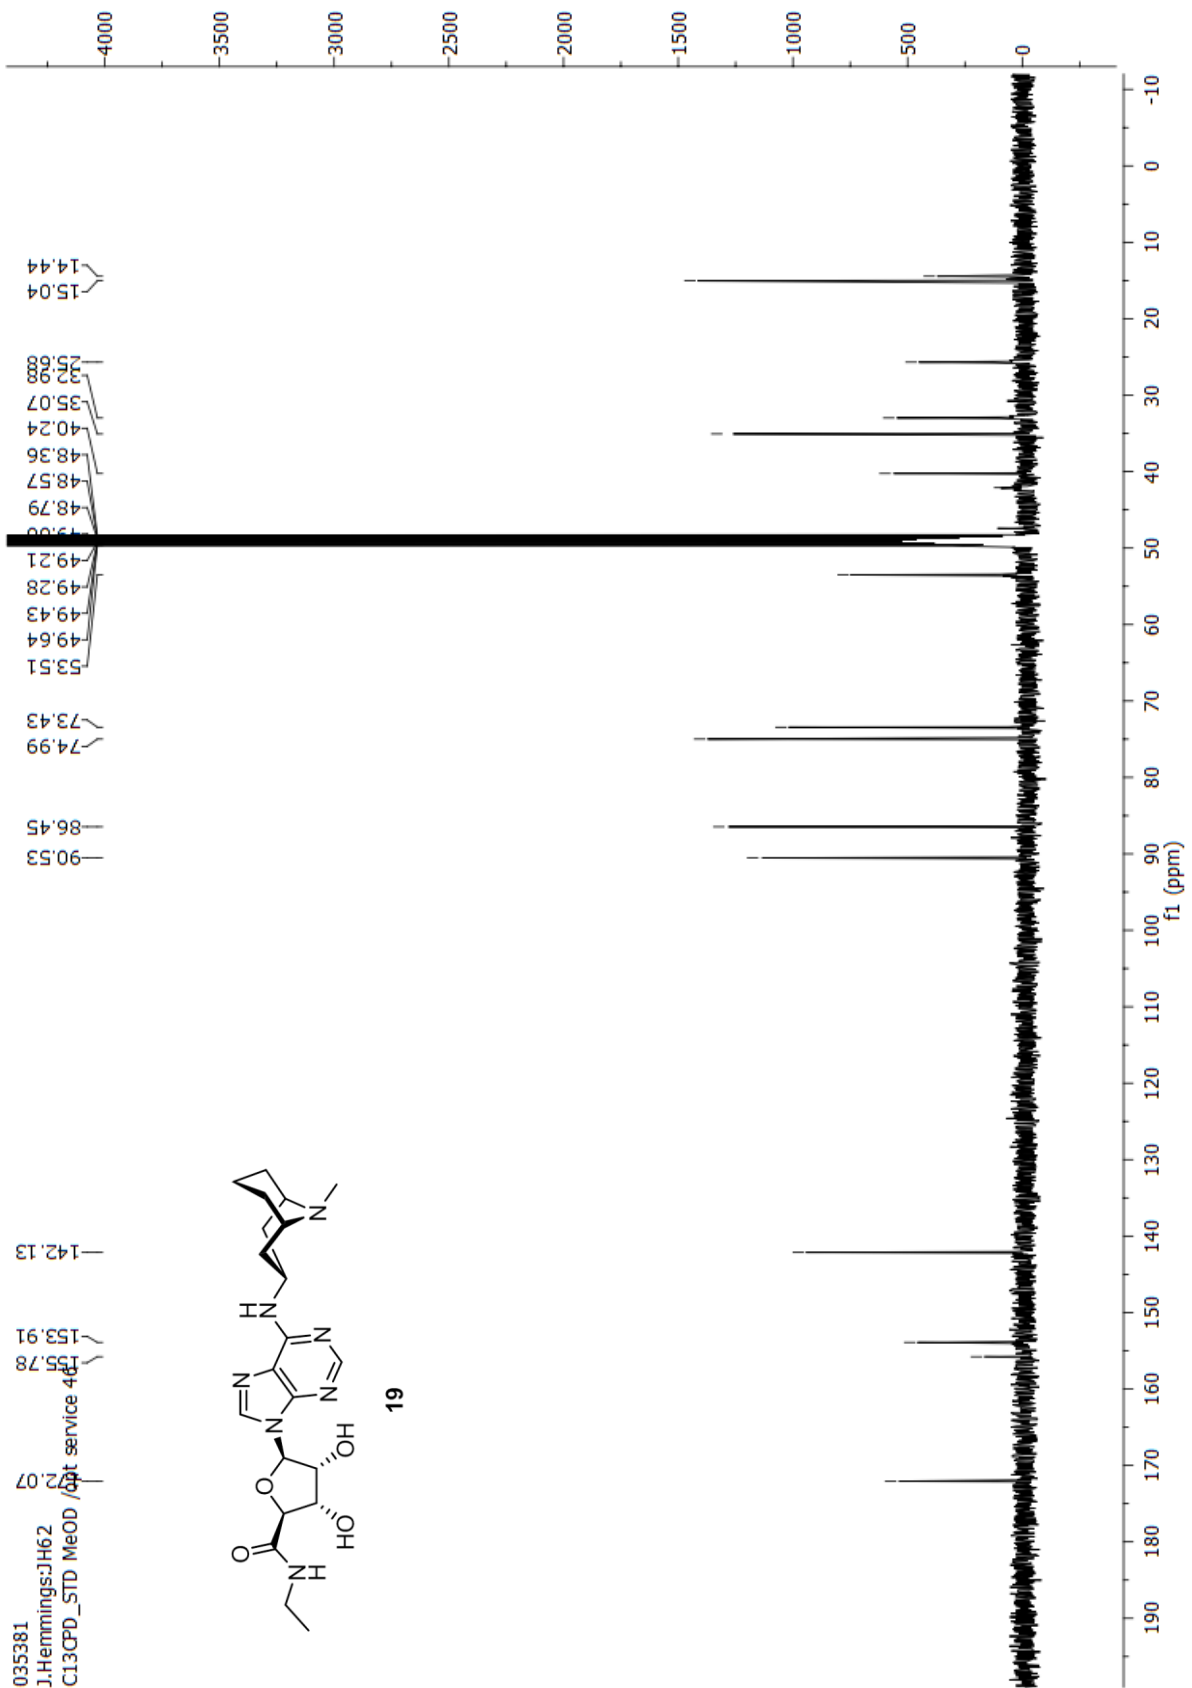

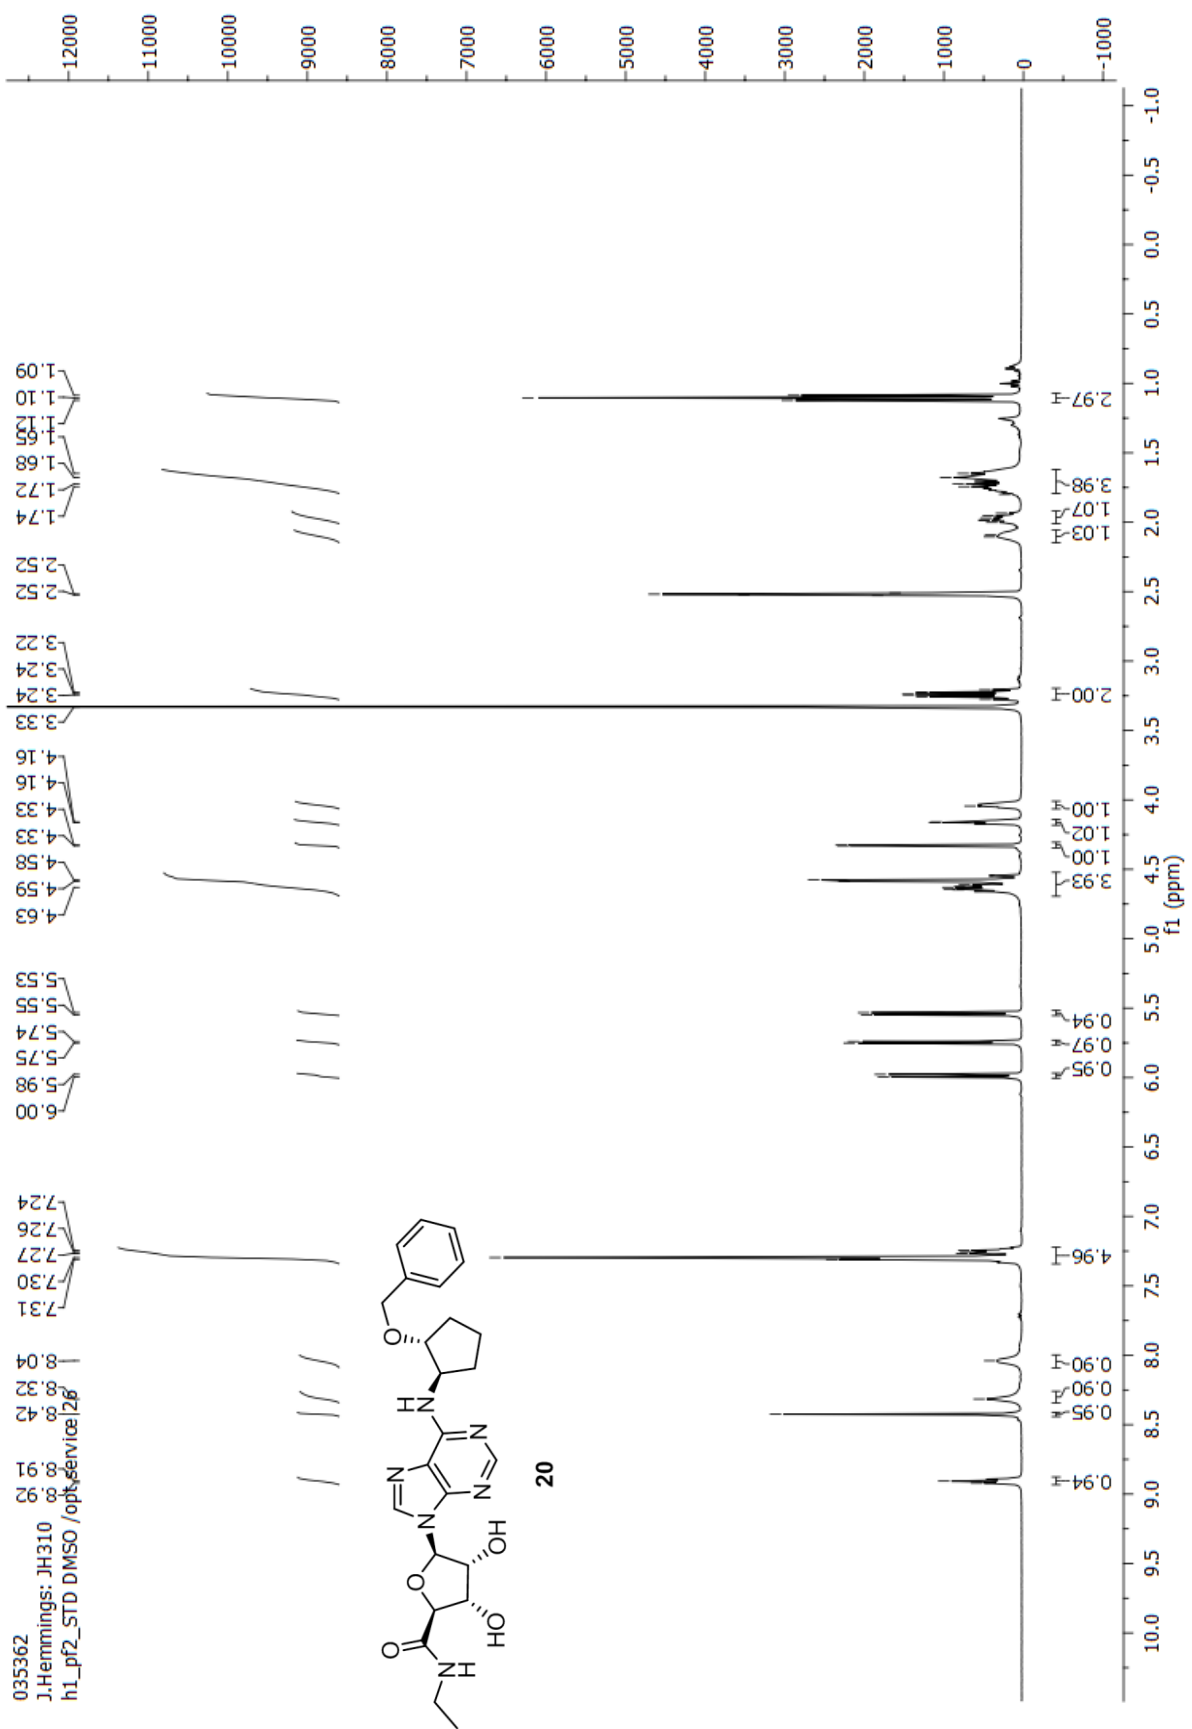

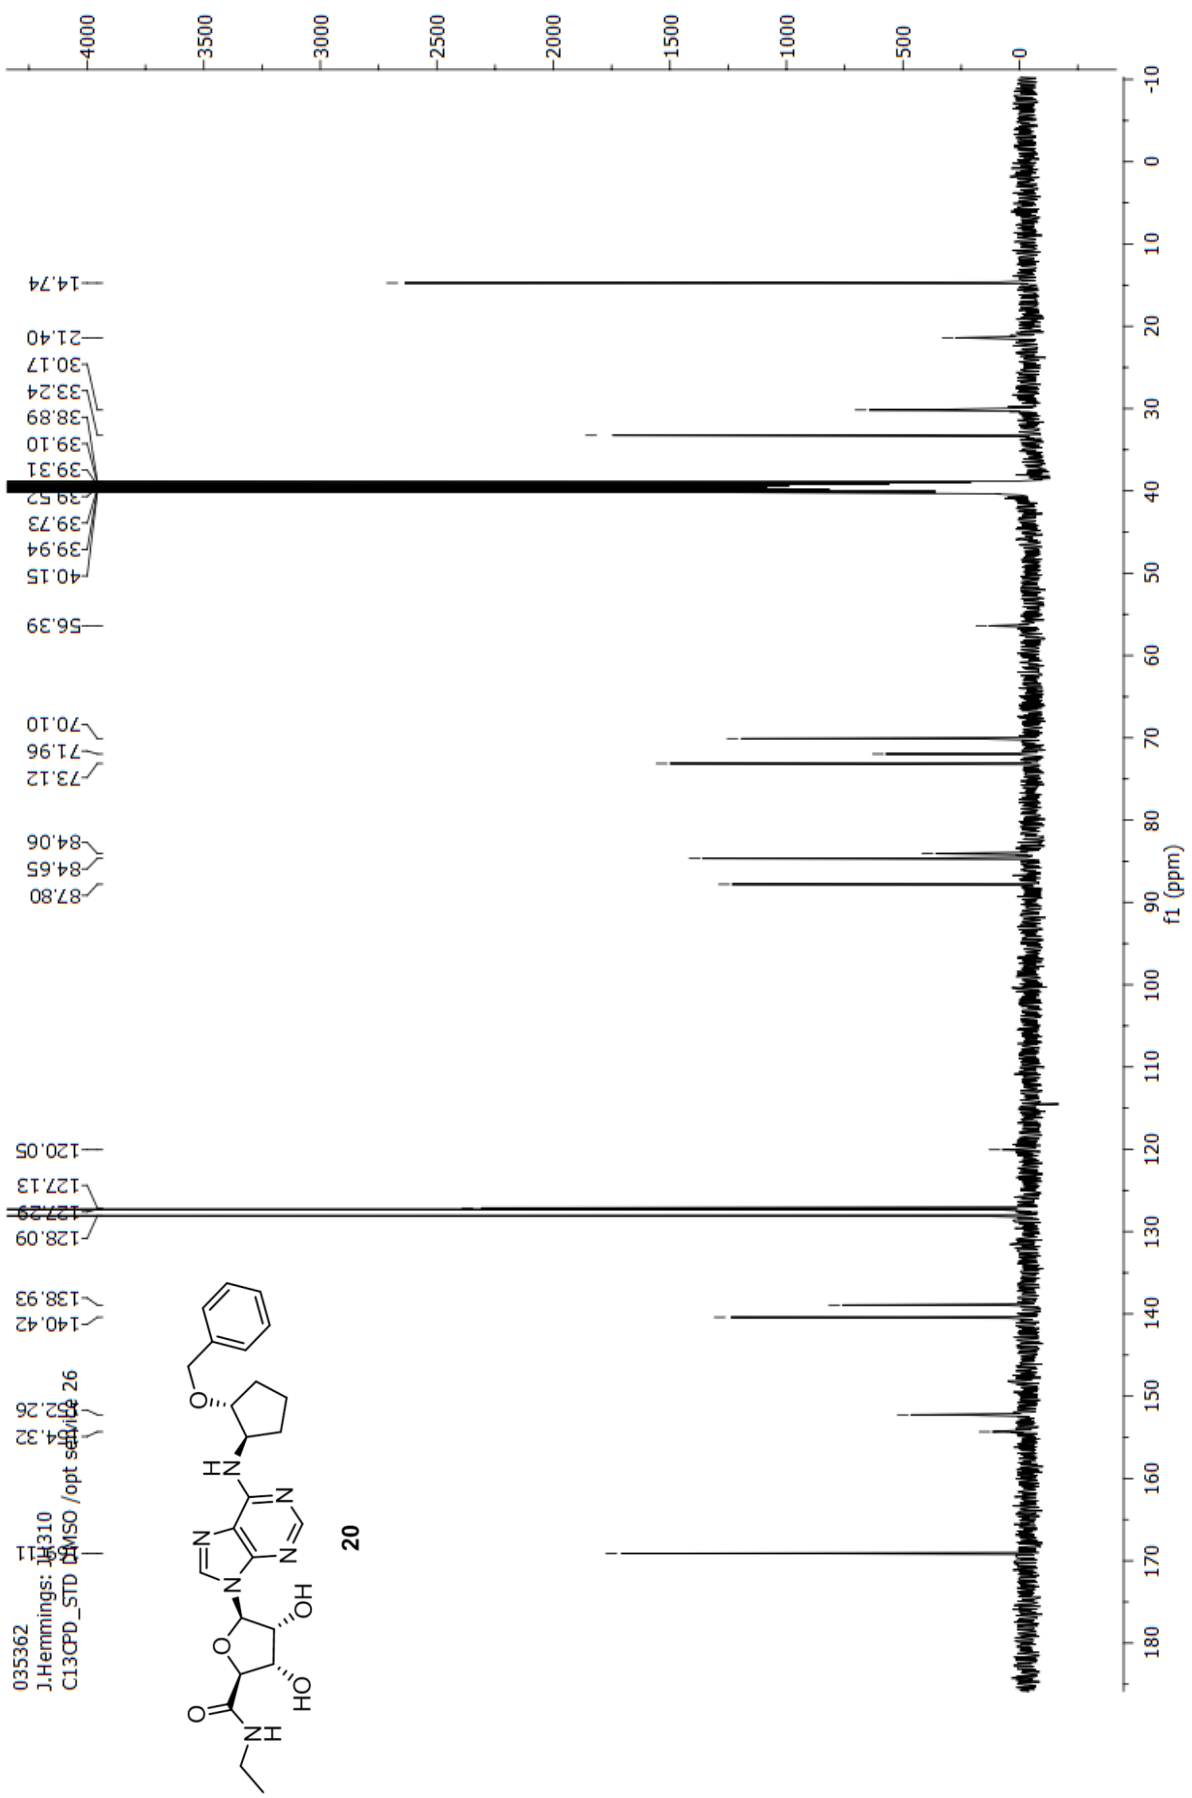

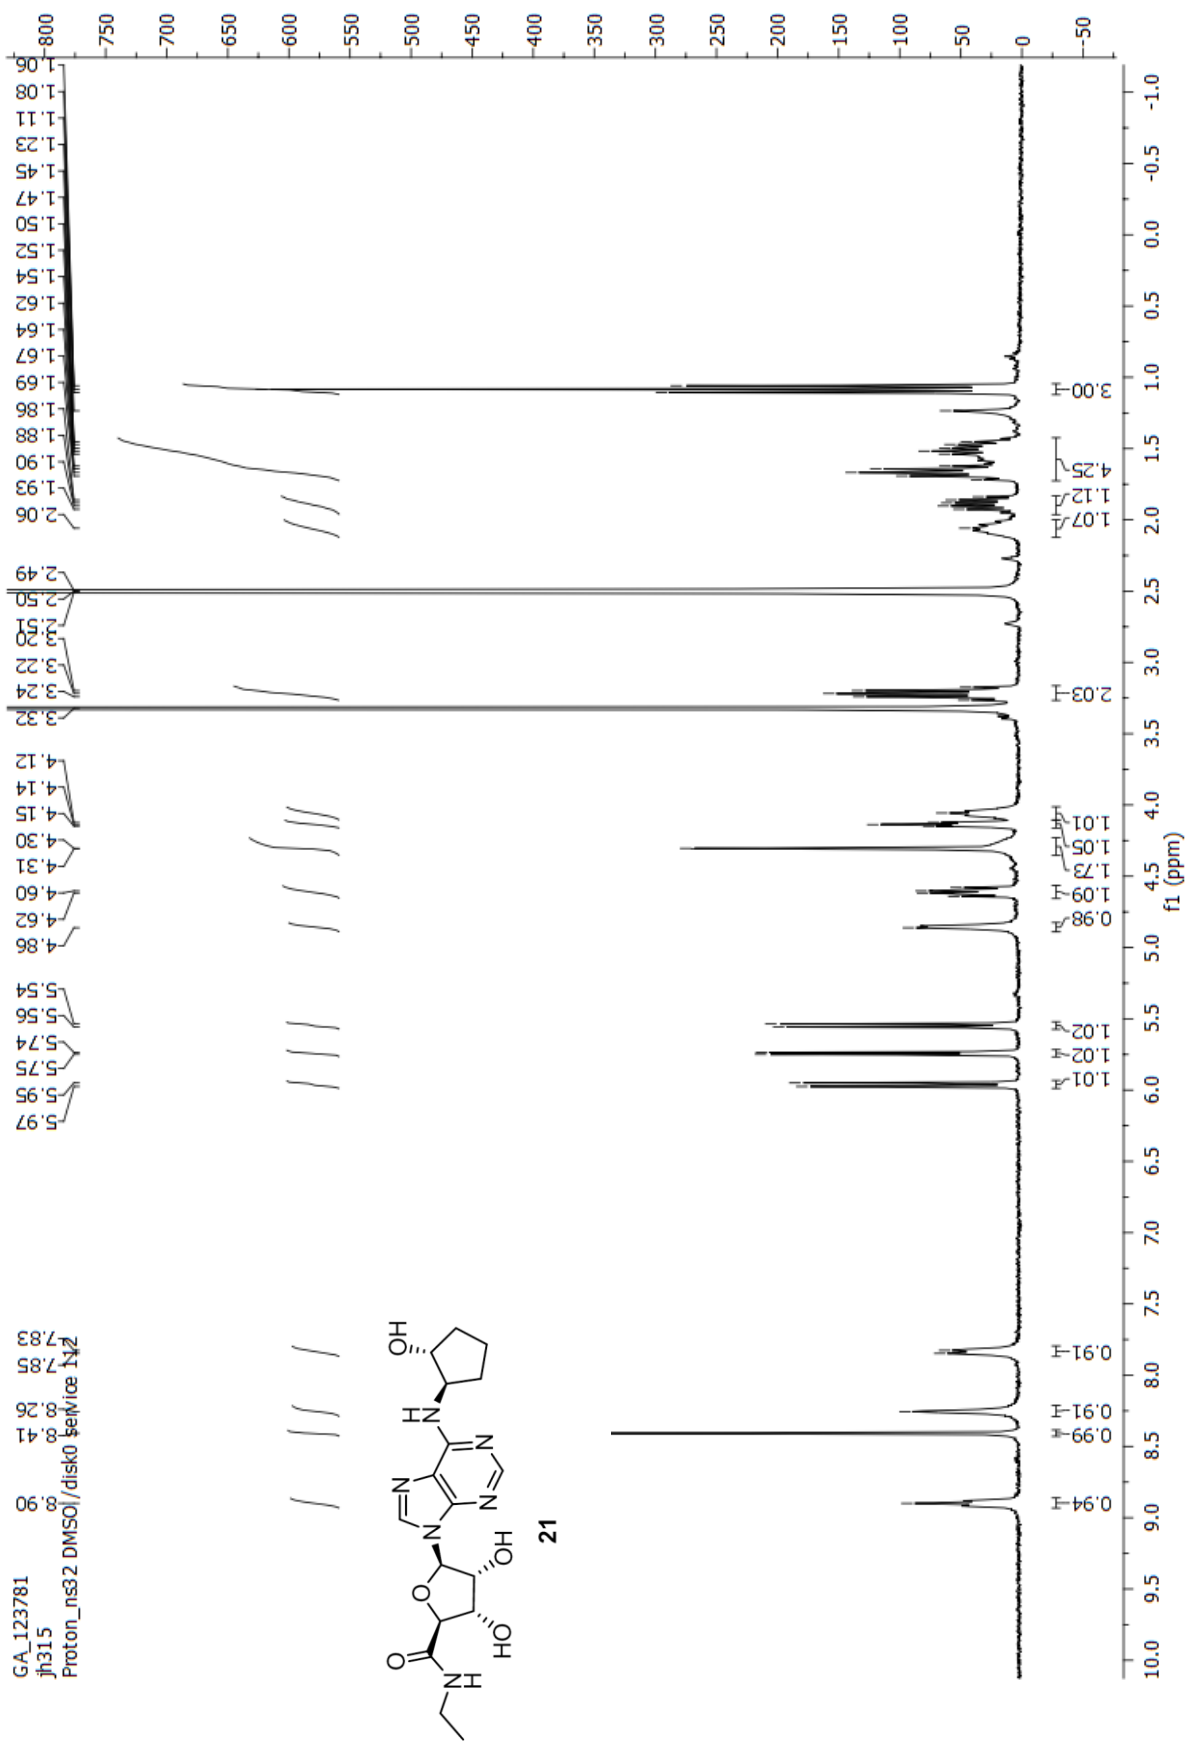

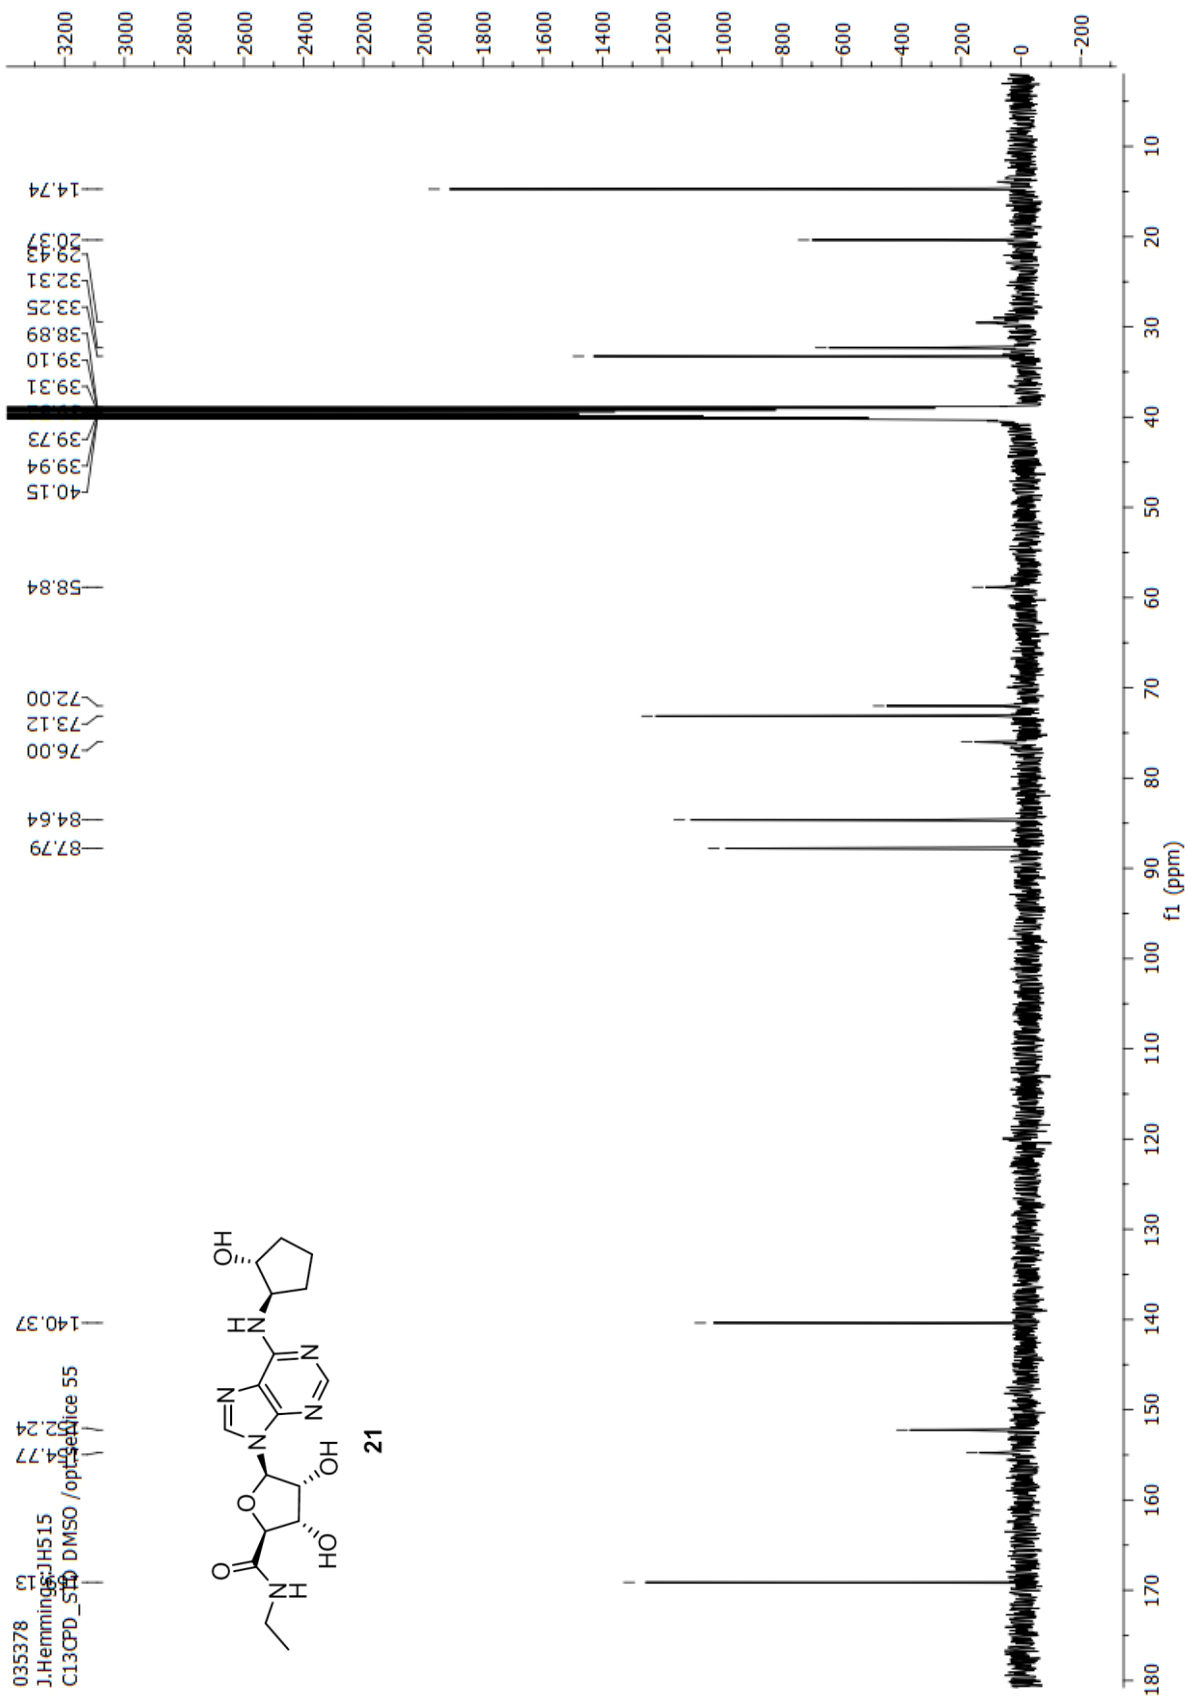

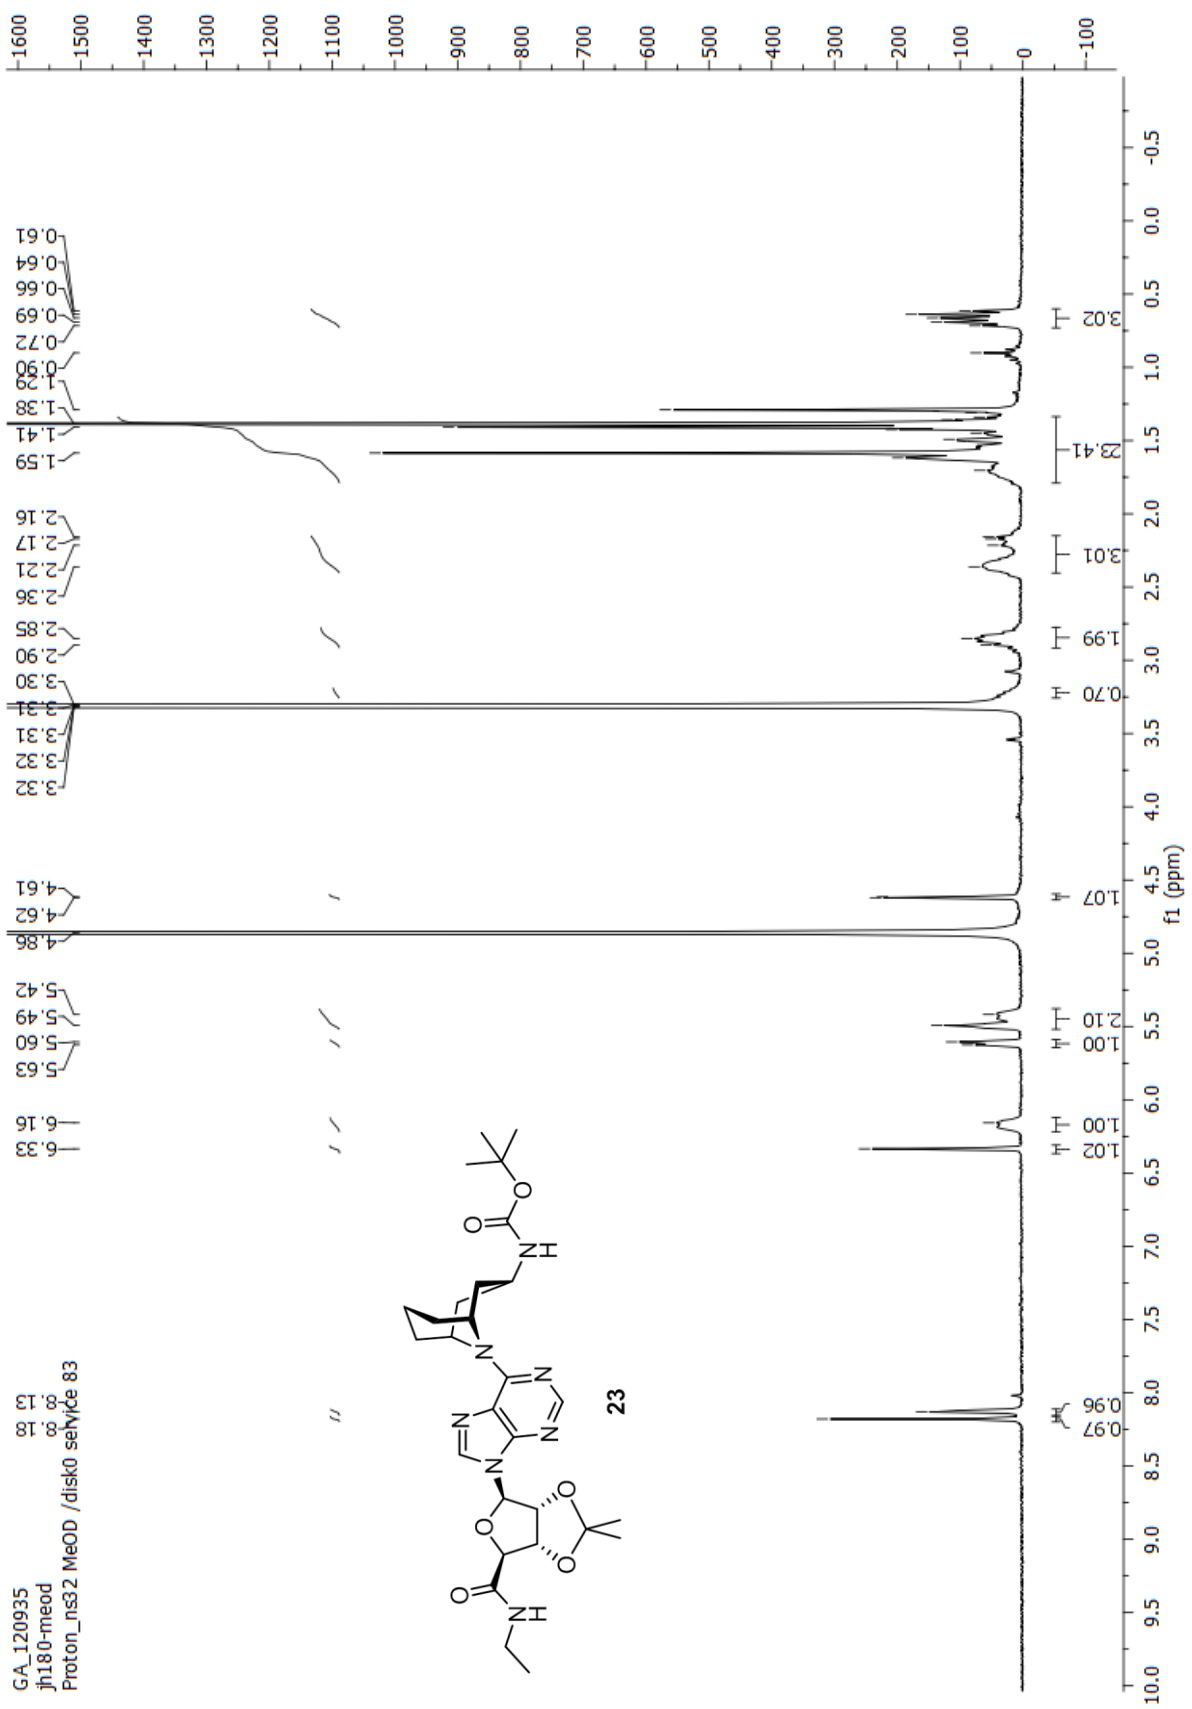



06/07/2015 21:51:43

|                               |                      |                          |                                                       |                               |                      |
|-------------------------------|----------------------|--------------------------|-------------------------------------------------------|-------------------------------|----------------------|
| <b>Acquisition Time (sec)</b> | 1.2059               | <b>Comment</b>           | J.Hemmings C13CPD STD MeOD /opt service 40            | <b>Date</b>                   | 13 Sep 2014 11:14:40 |
| <b>Date Stamp</b>             | 13 Sep 2014 11:14:40 | <b>File Name</b>         | G:\NMR data files\NMR Backup Jan 2015\NMR03534212.fid | <b>Origin</b>                 | avil400              |
| <b>Frequency (MHz)</b>        | 100.61               | <b>Nucleus</b>           | 13C                                                   | <b>Number of Transients</b>   | 8192                 |
| <b>Original Points Count</b>  | 32768                | <b>Owner</b>             | nmr                                                   | <b>Points Count</b>           | 32768                |
| <b>Receiver Gain</b>          | 203.00               | <b>SW(cyclical) (Hz)</b> | 27173.91                                              | <b>Solvent</b>                | METHANOL-d4          |
| <b>Spectrum Type</b>          | STANDARD             | <b>Sweep Width (Hz)</b>  | 27173.08                                              | <b>Temperature (degree C)</b> | 26.660               |
|                               |                      |                          |                                                       | <b>Pulse Sequence</b>         | zgpg                 |
|                               |                      |                          |                                                       | <b>Spectrum Offset (Hz)</b>   | 11726.5635           |

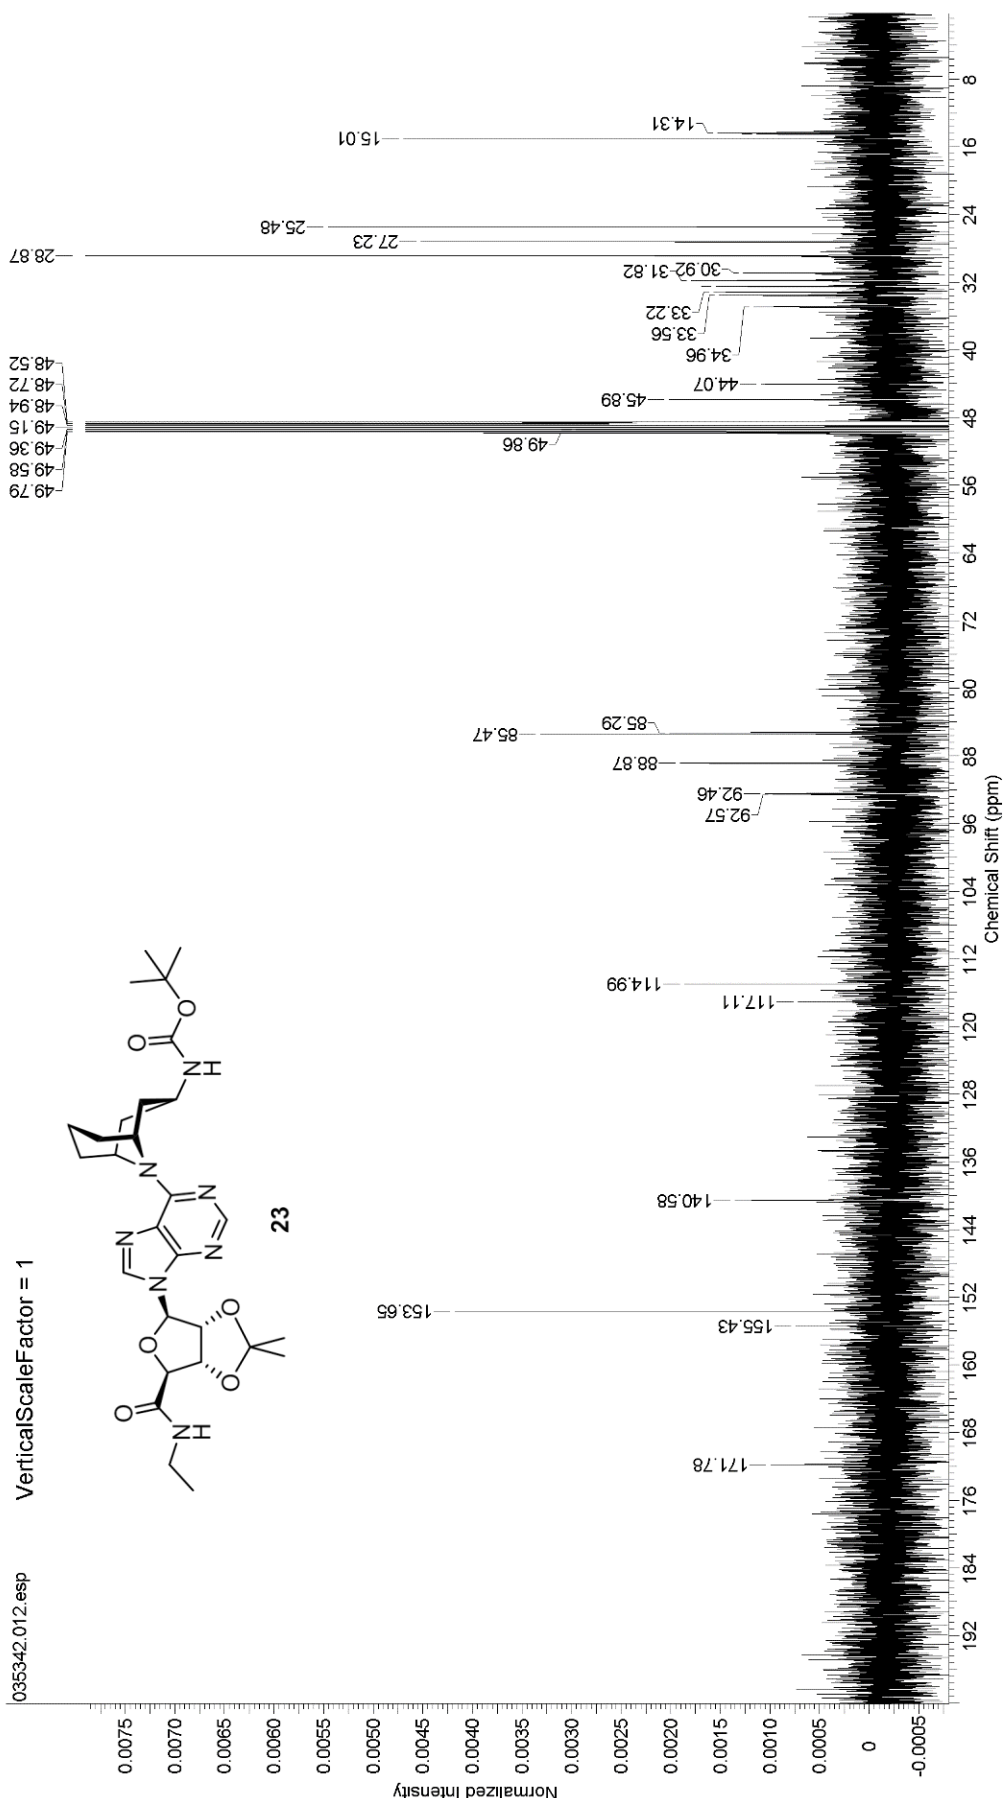

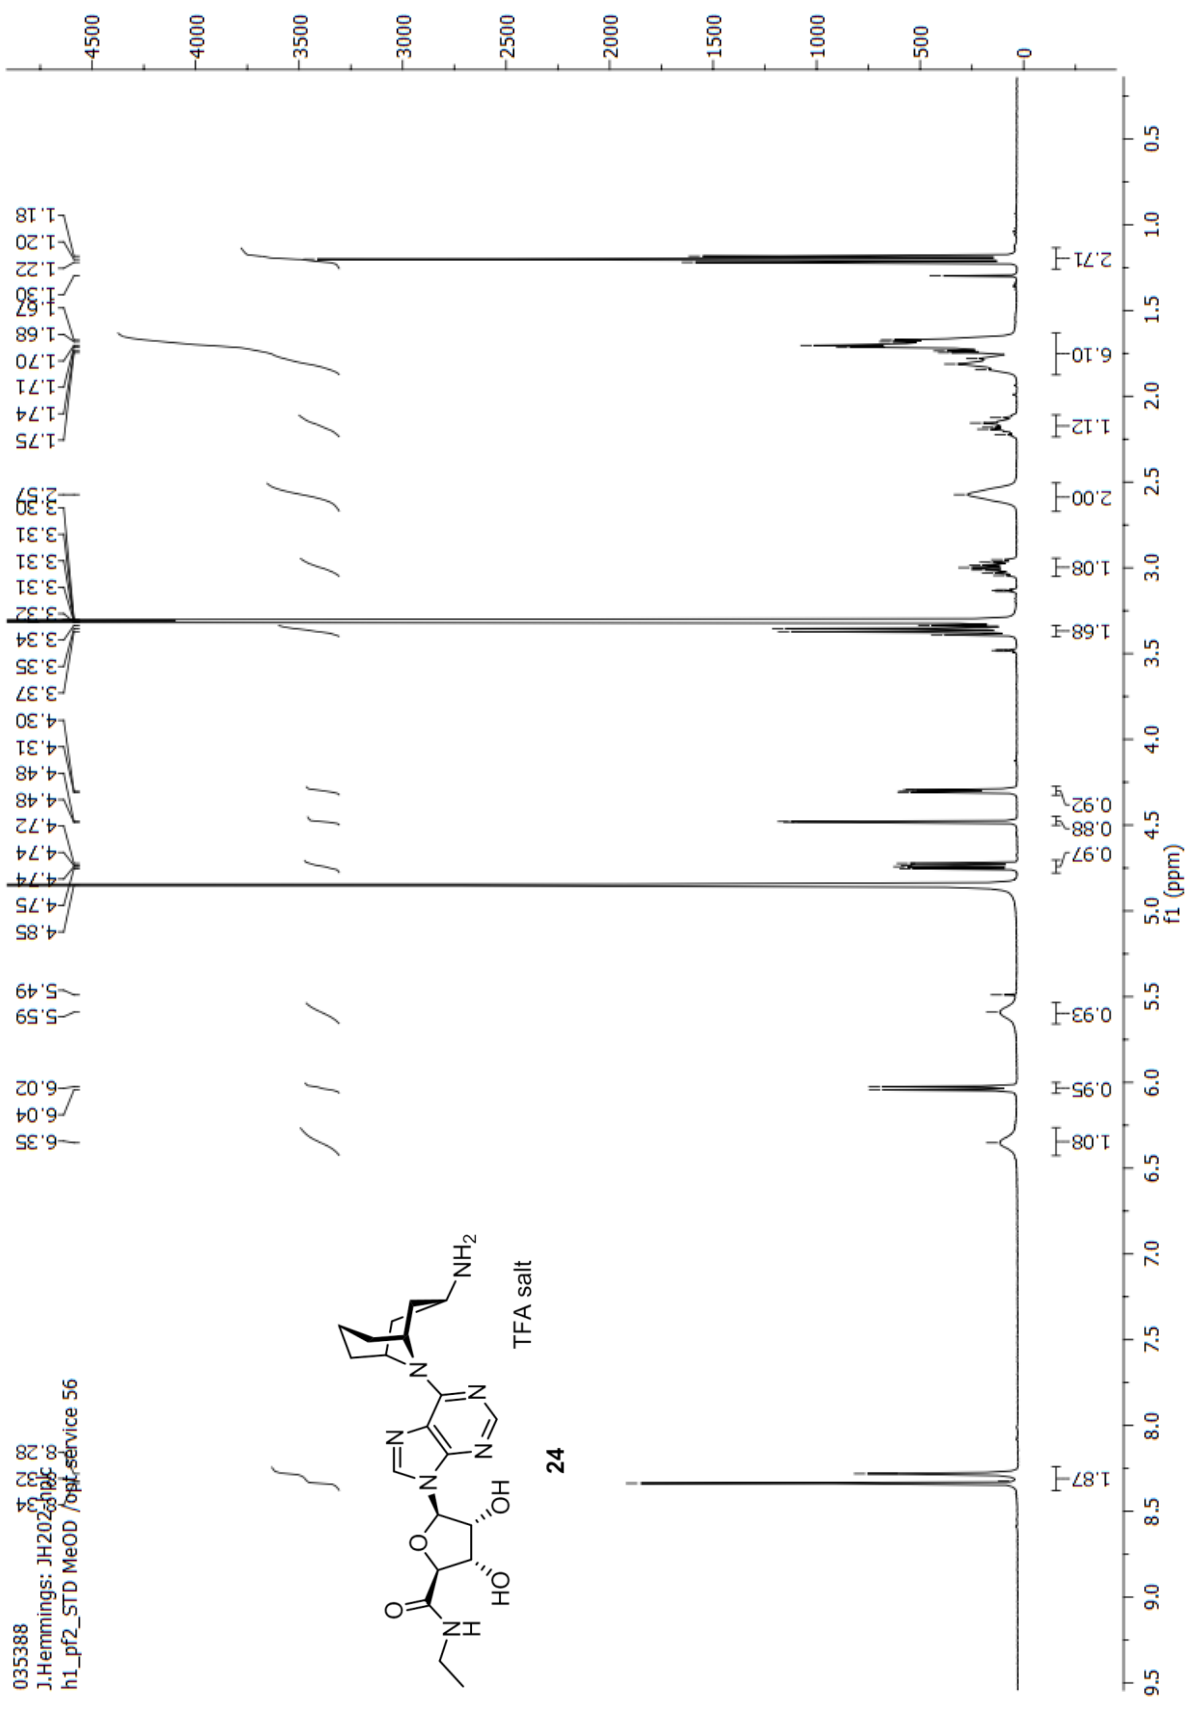

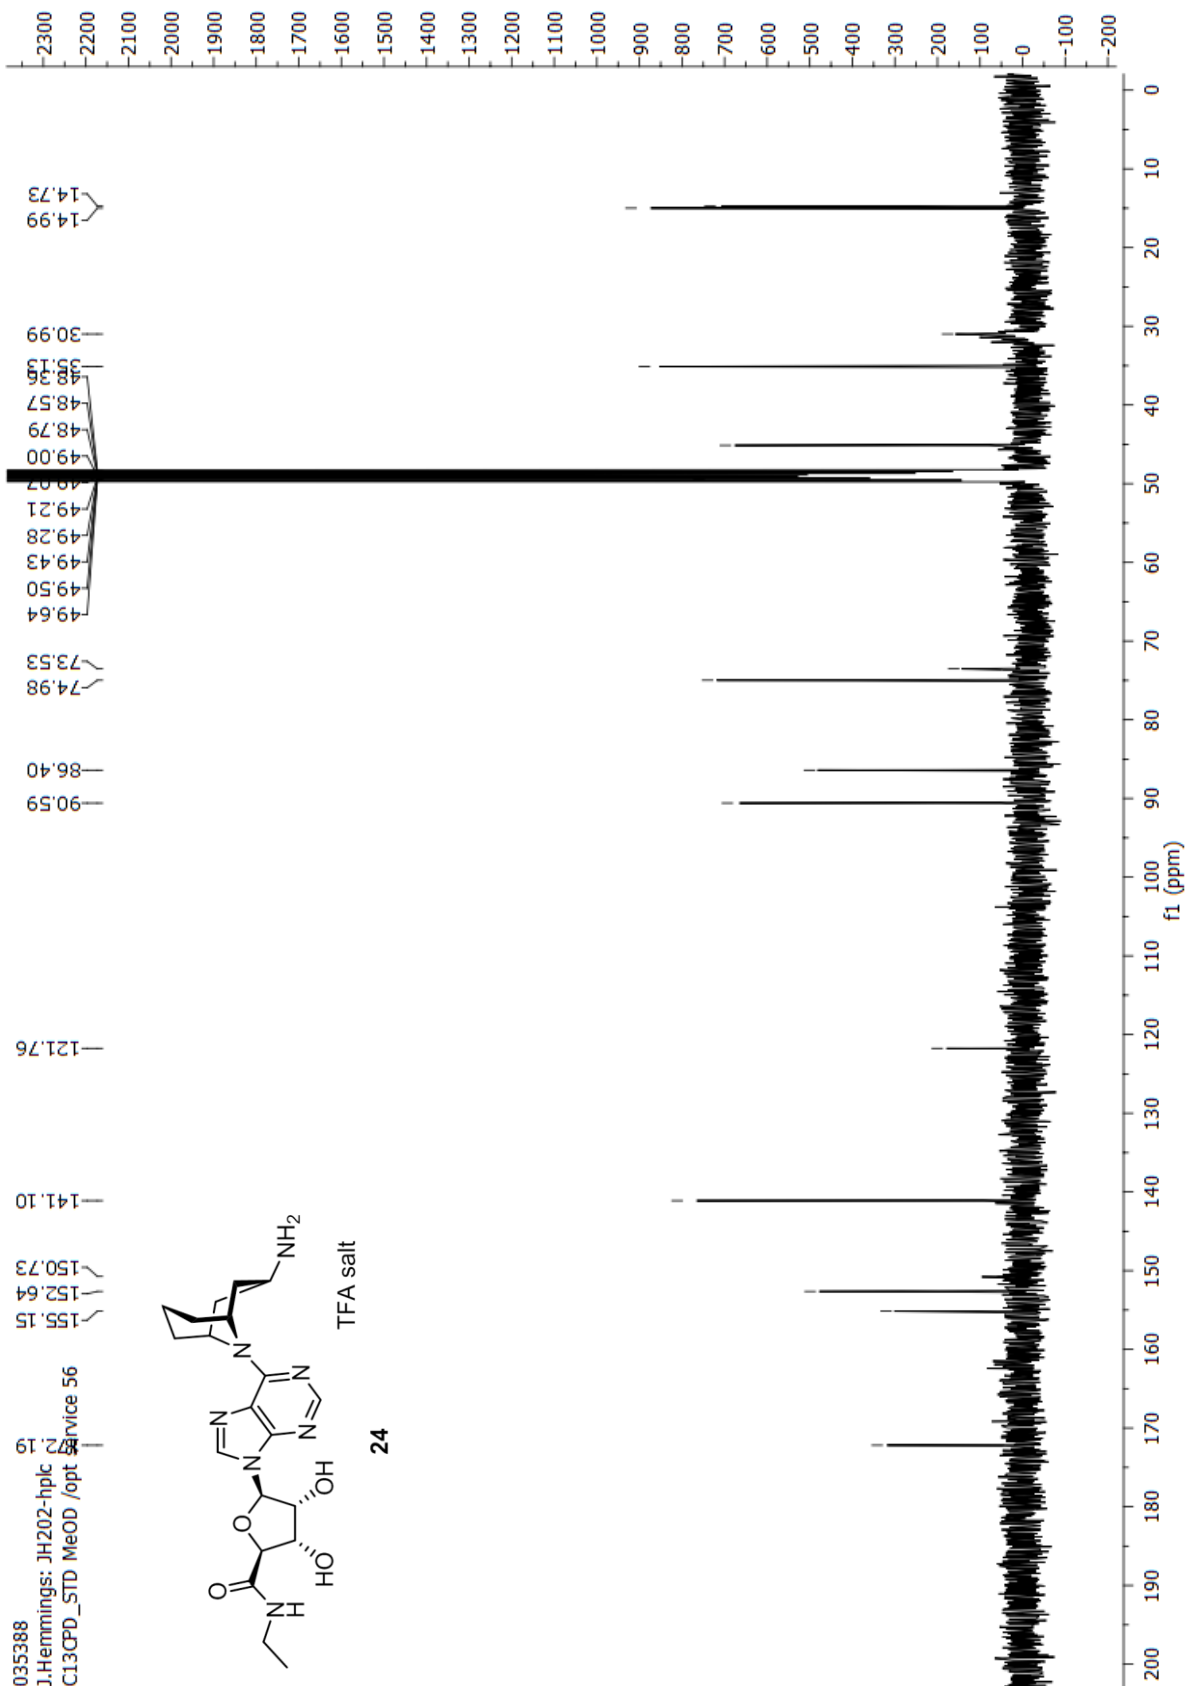

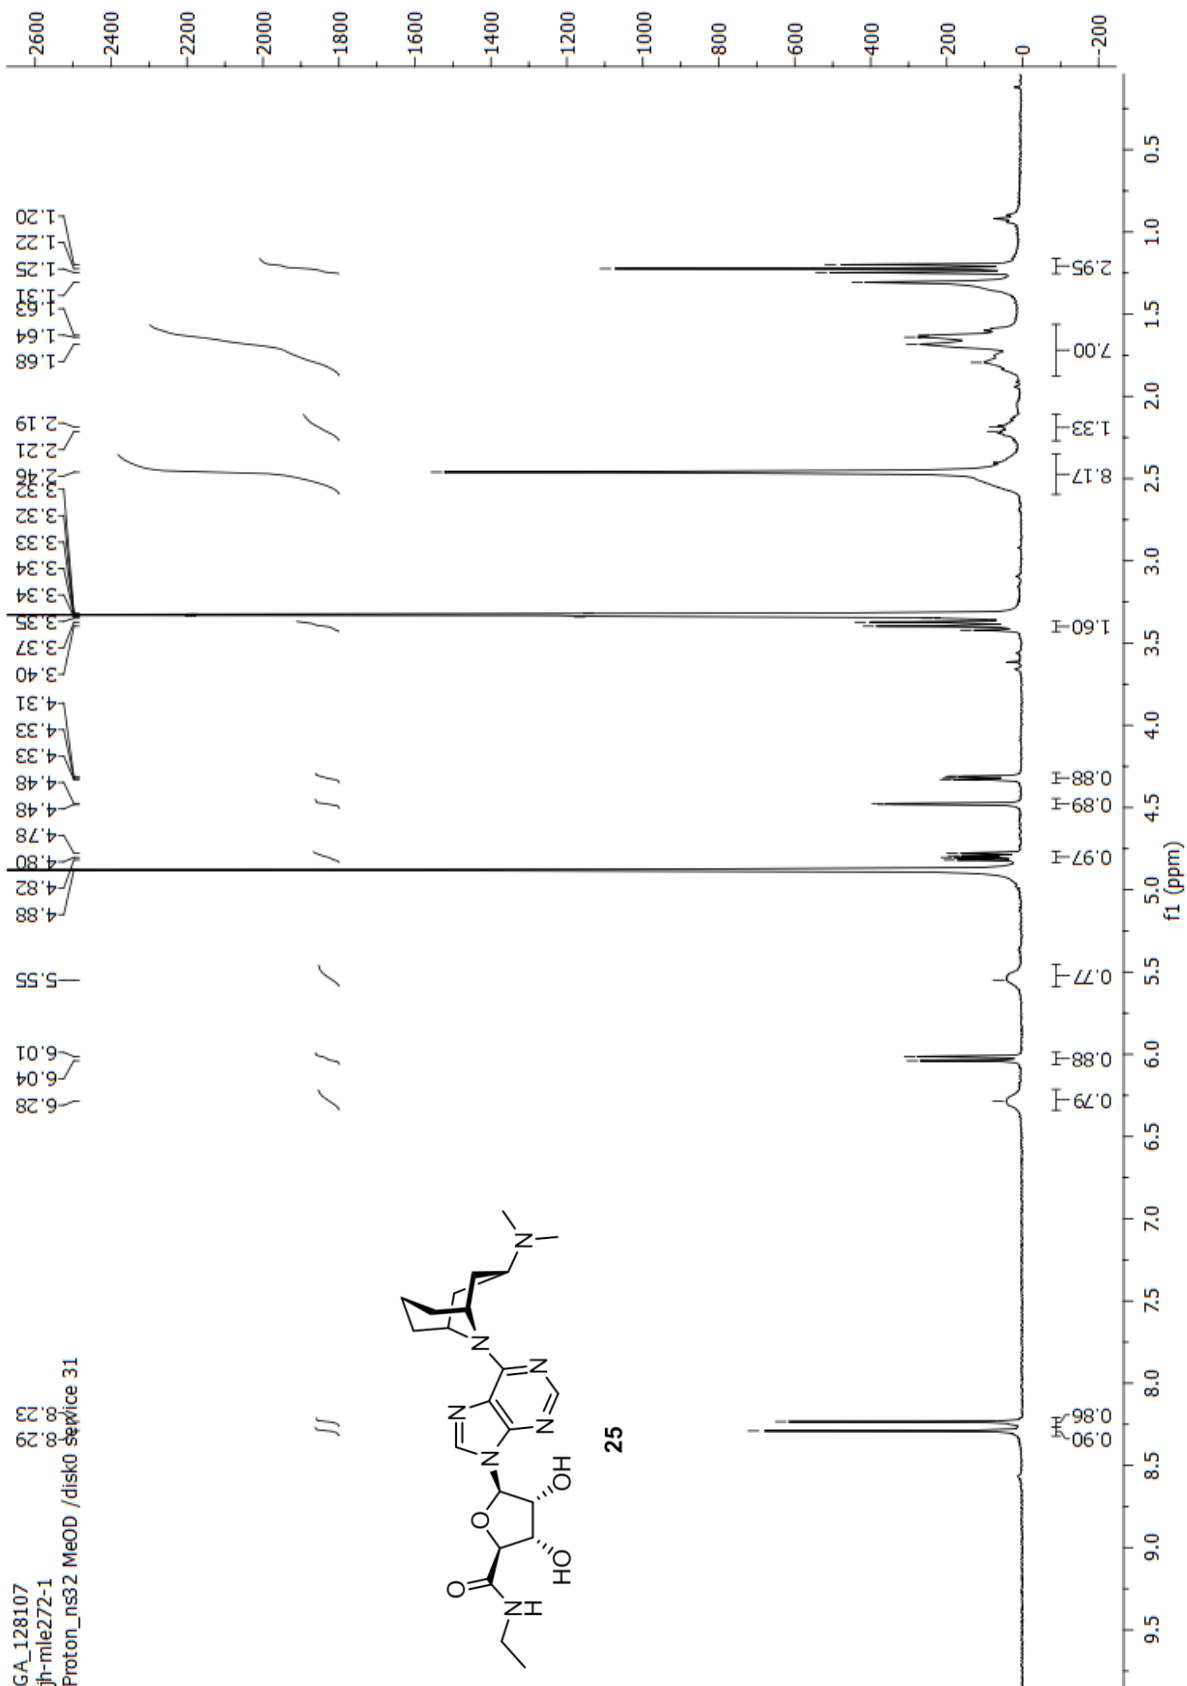

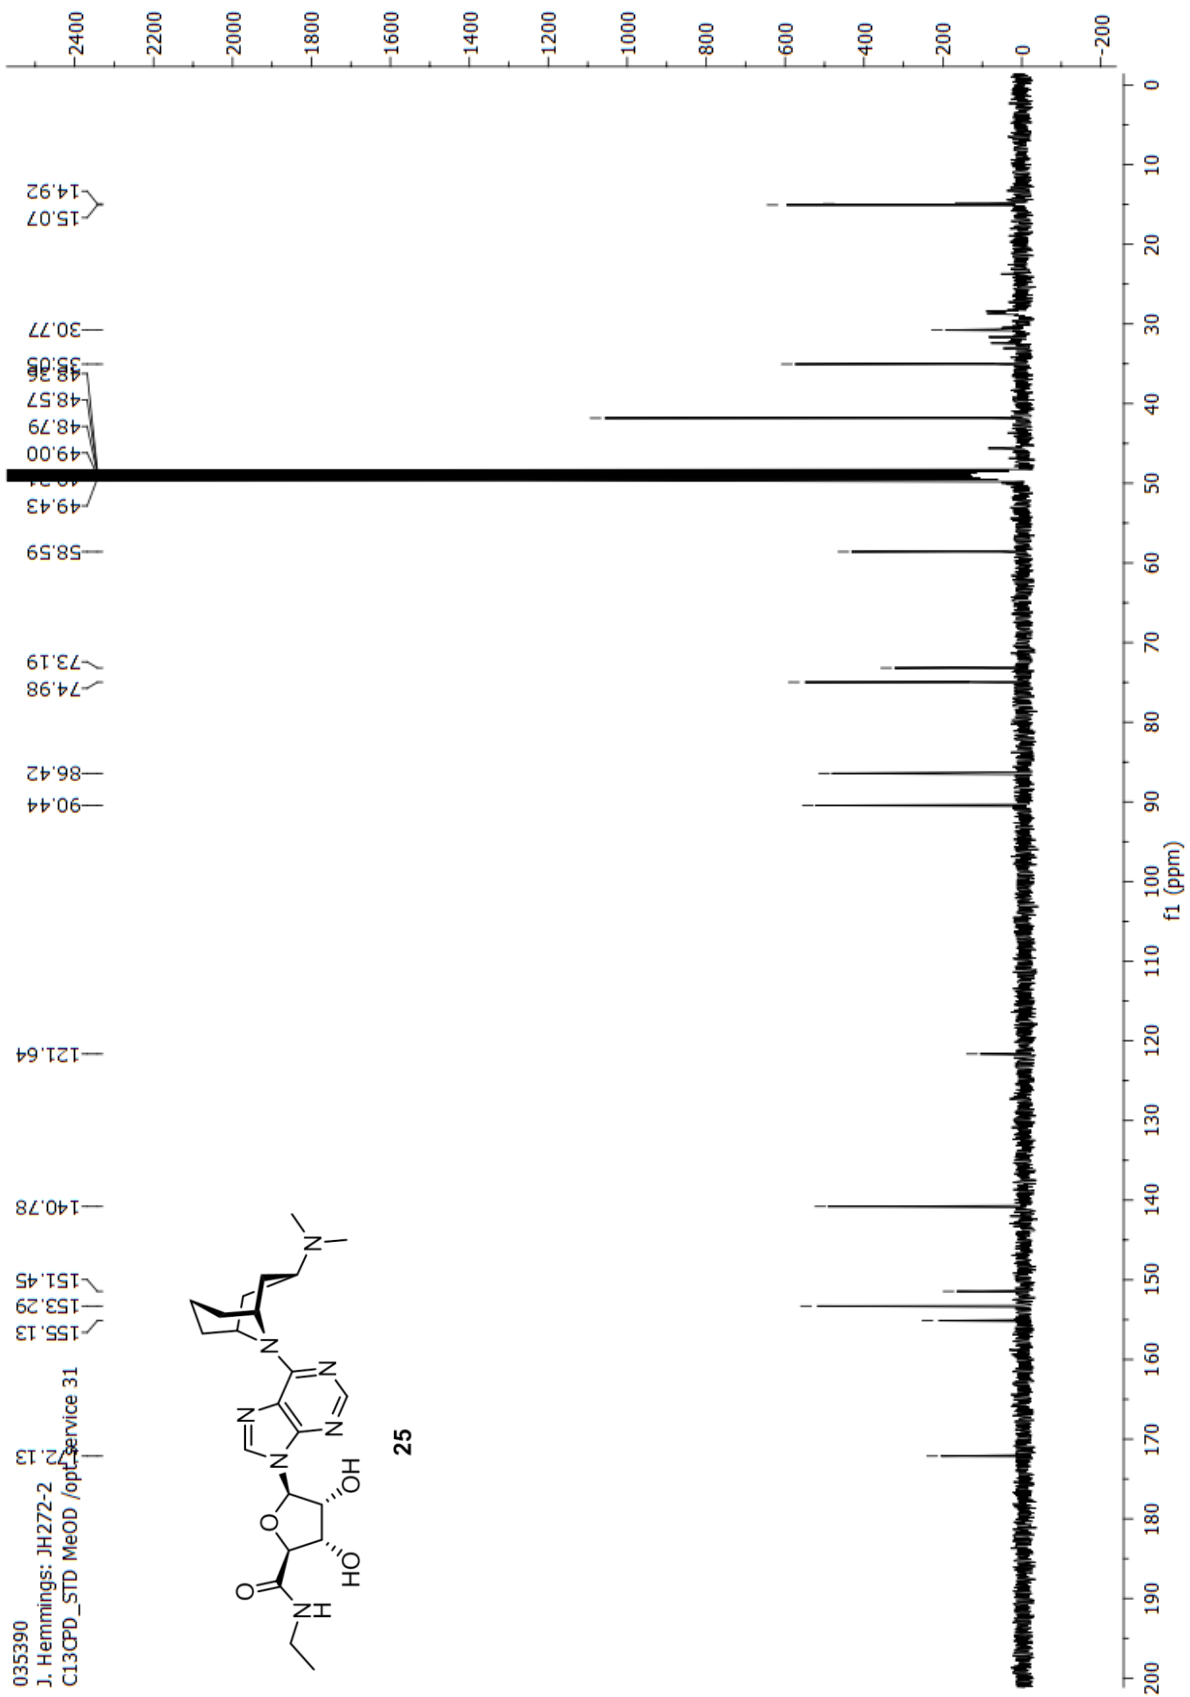

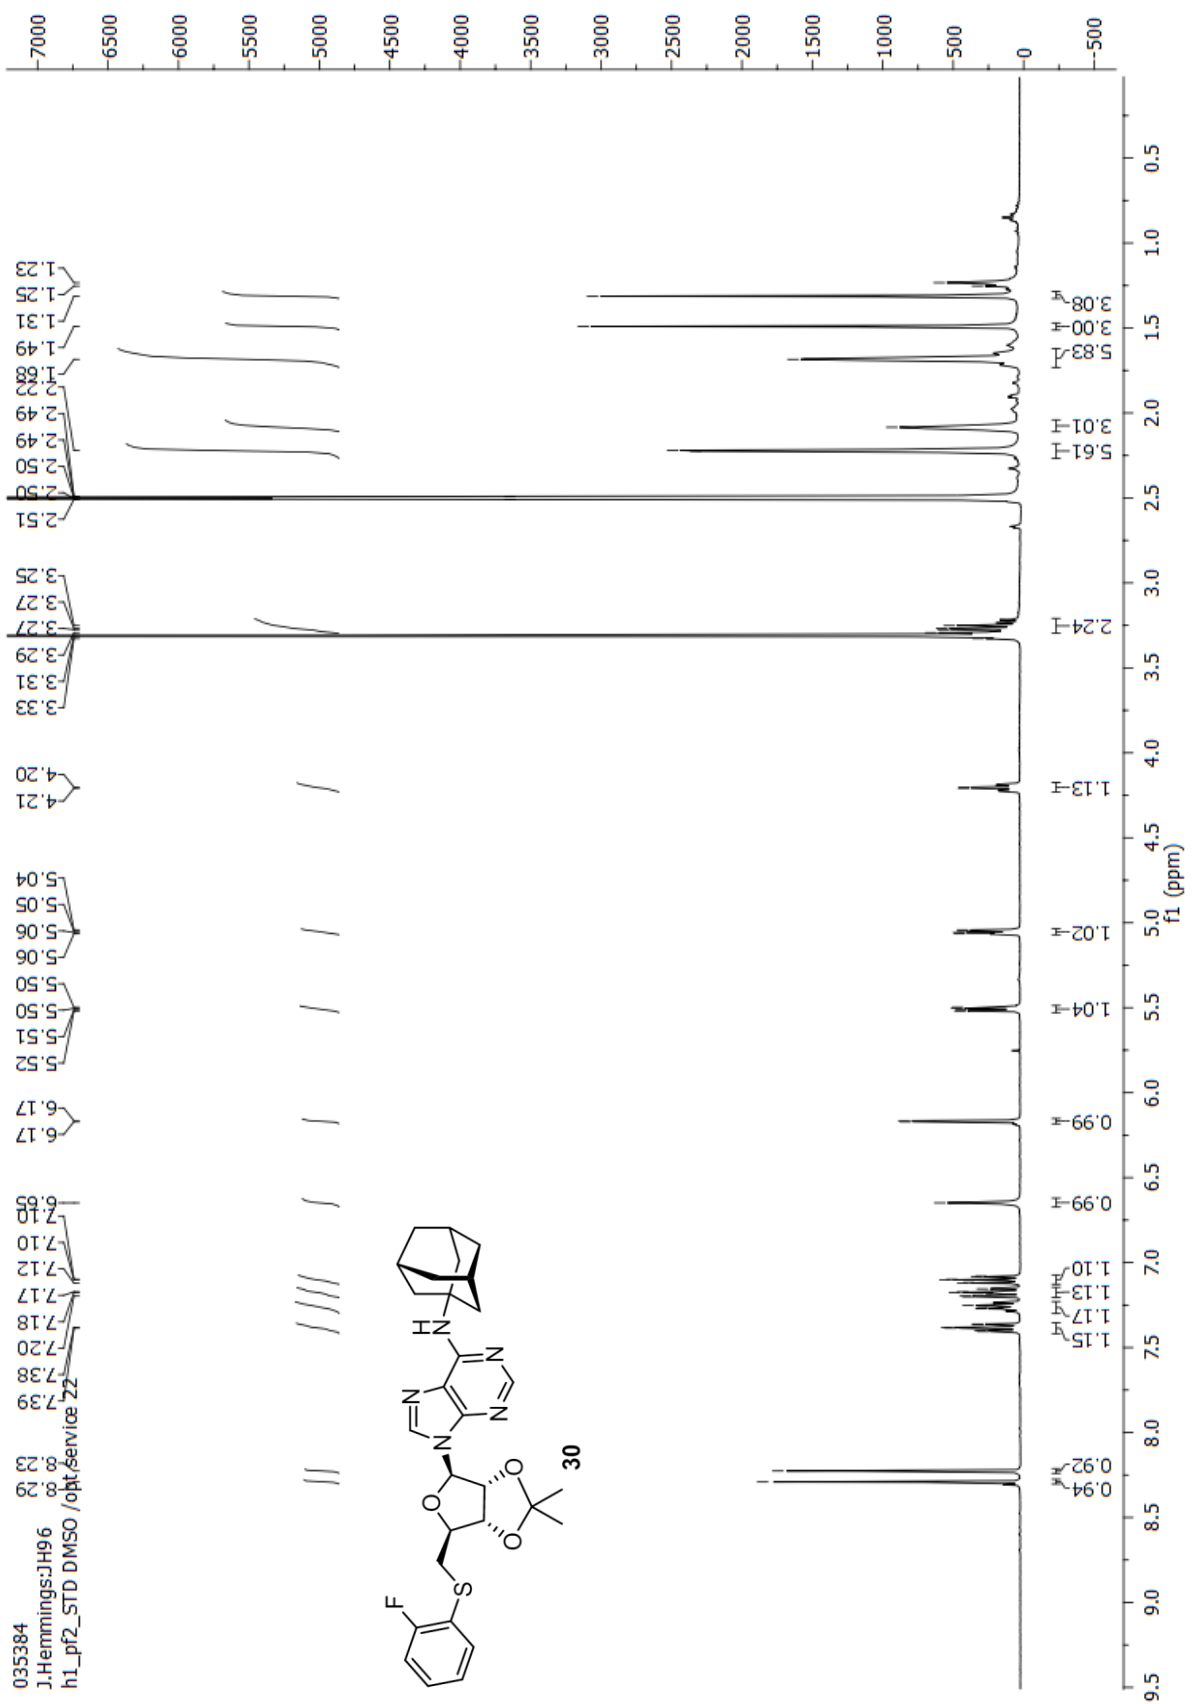

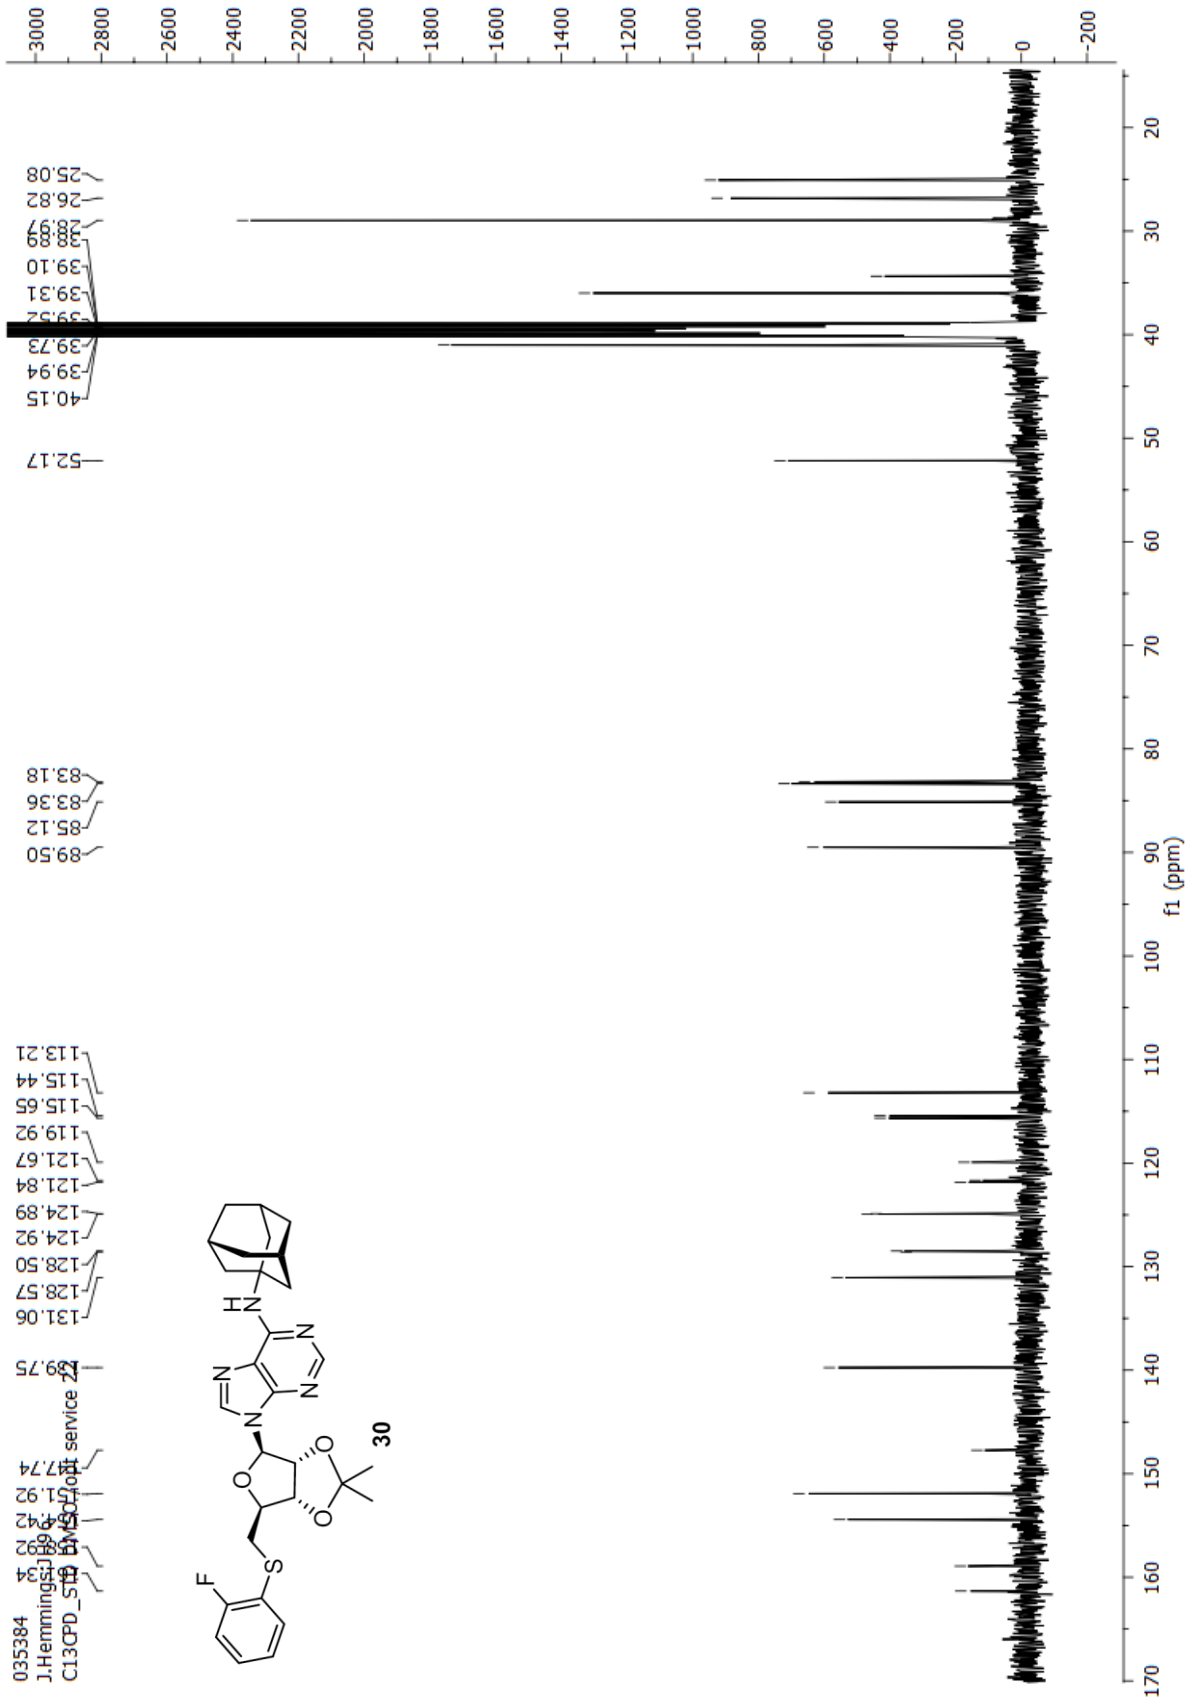

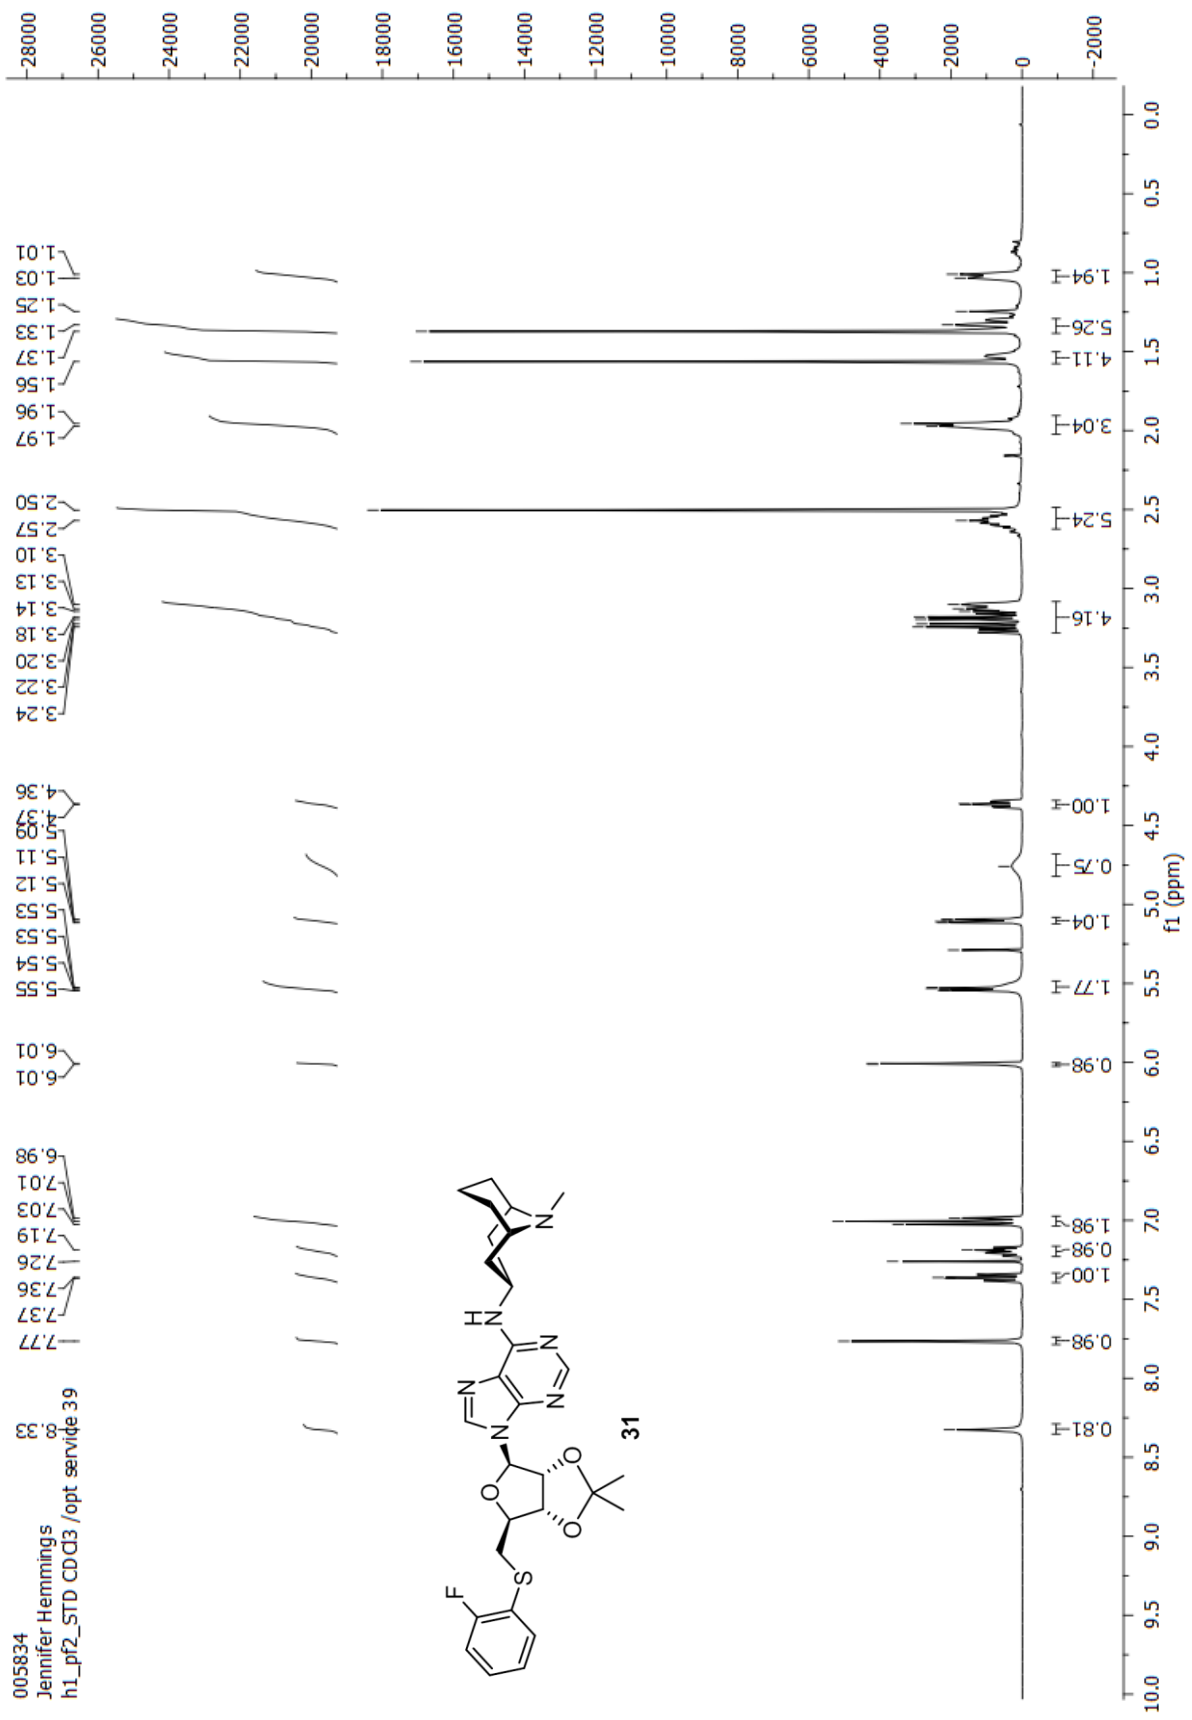



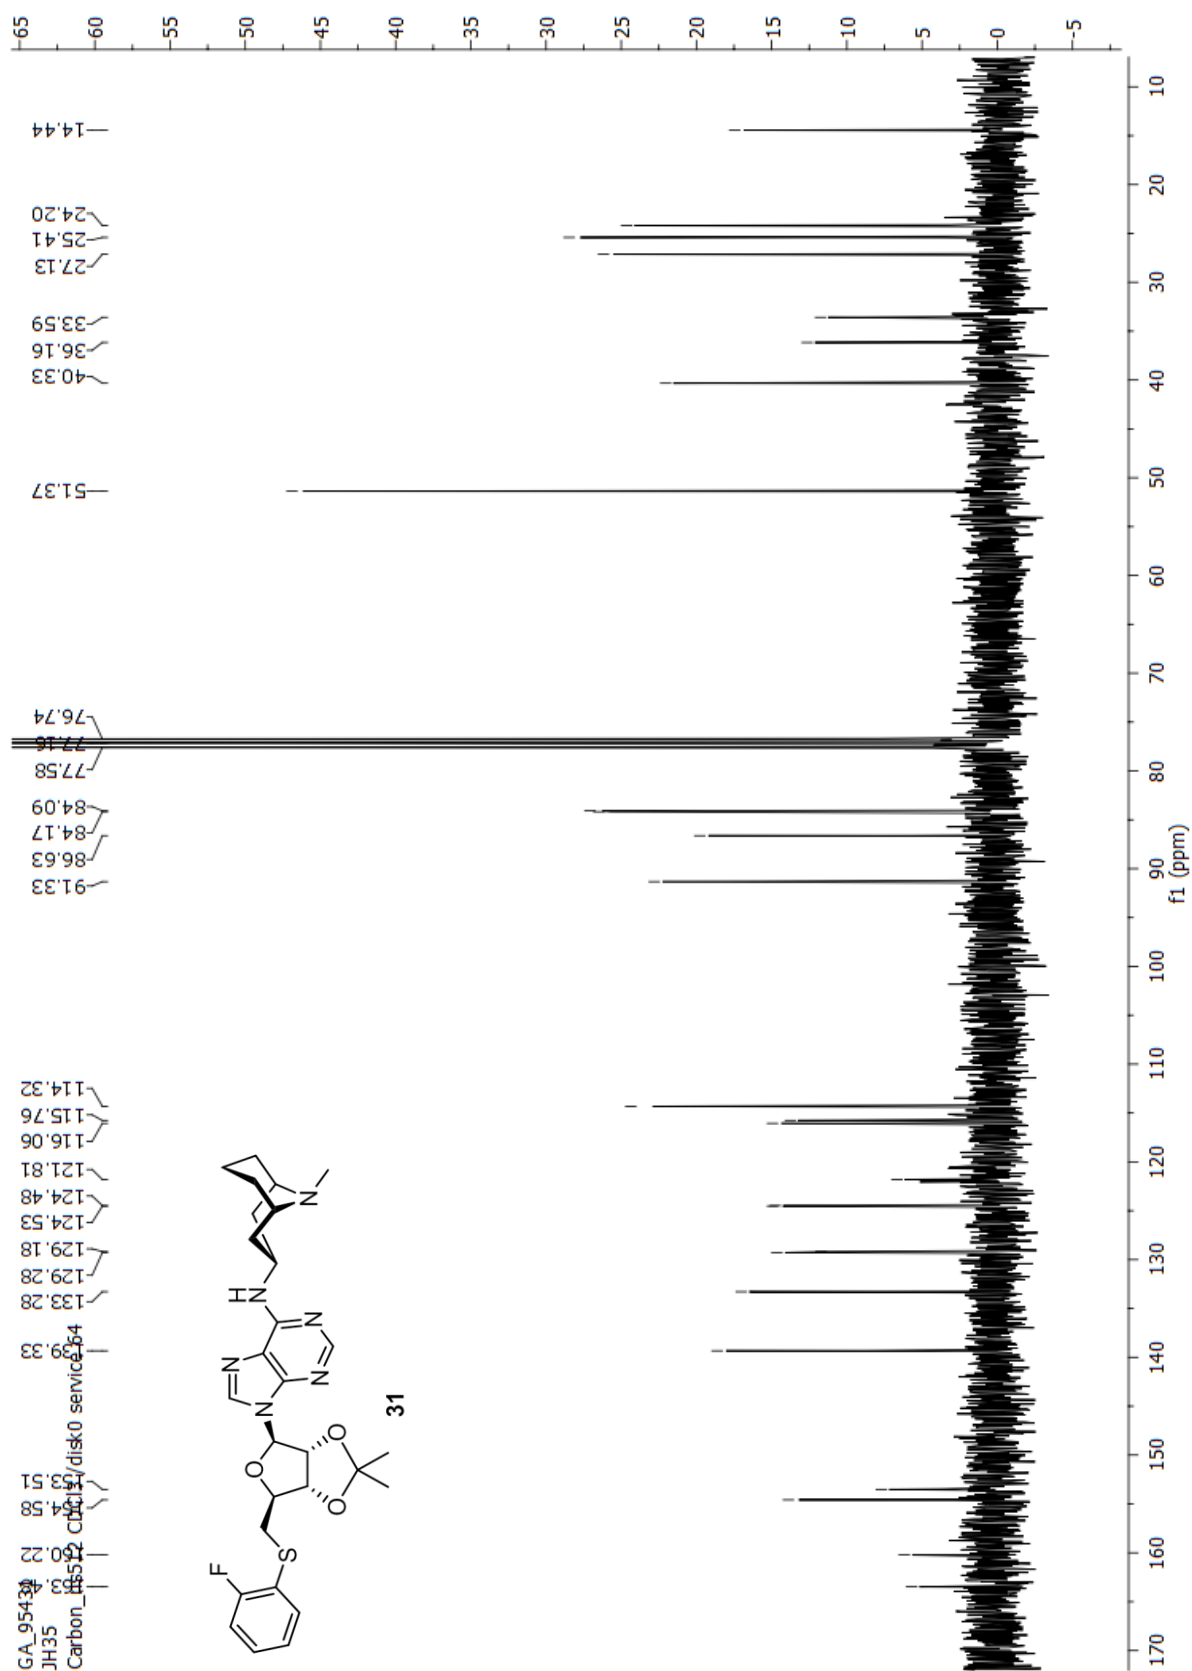

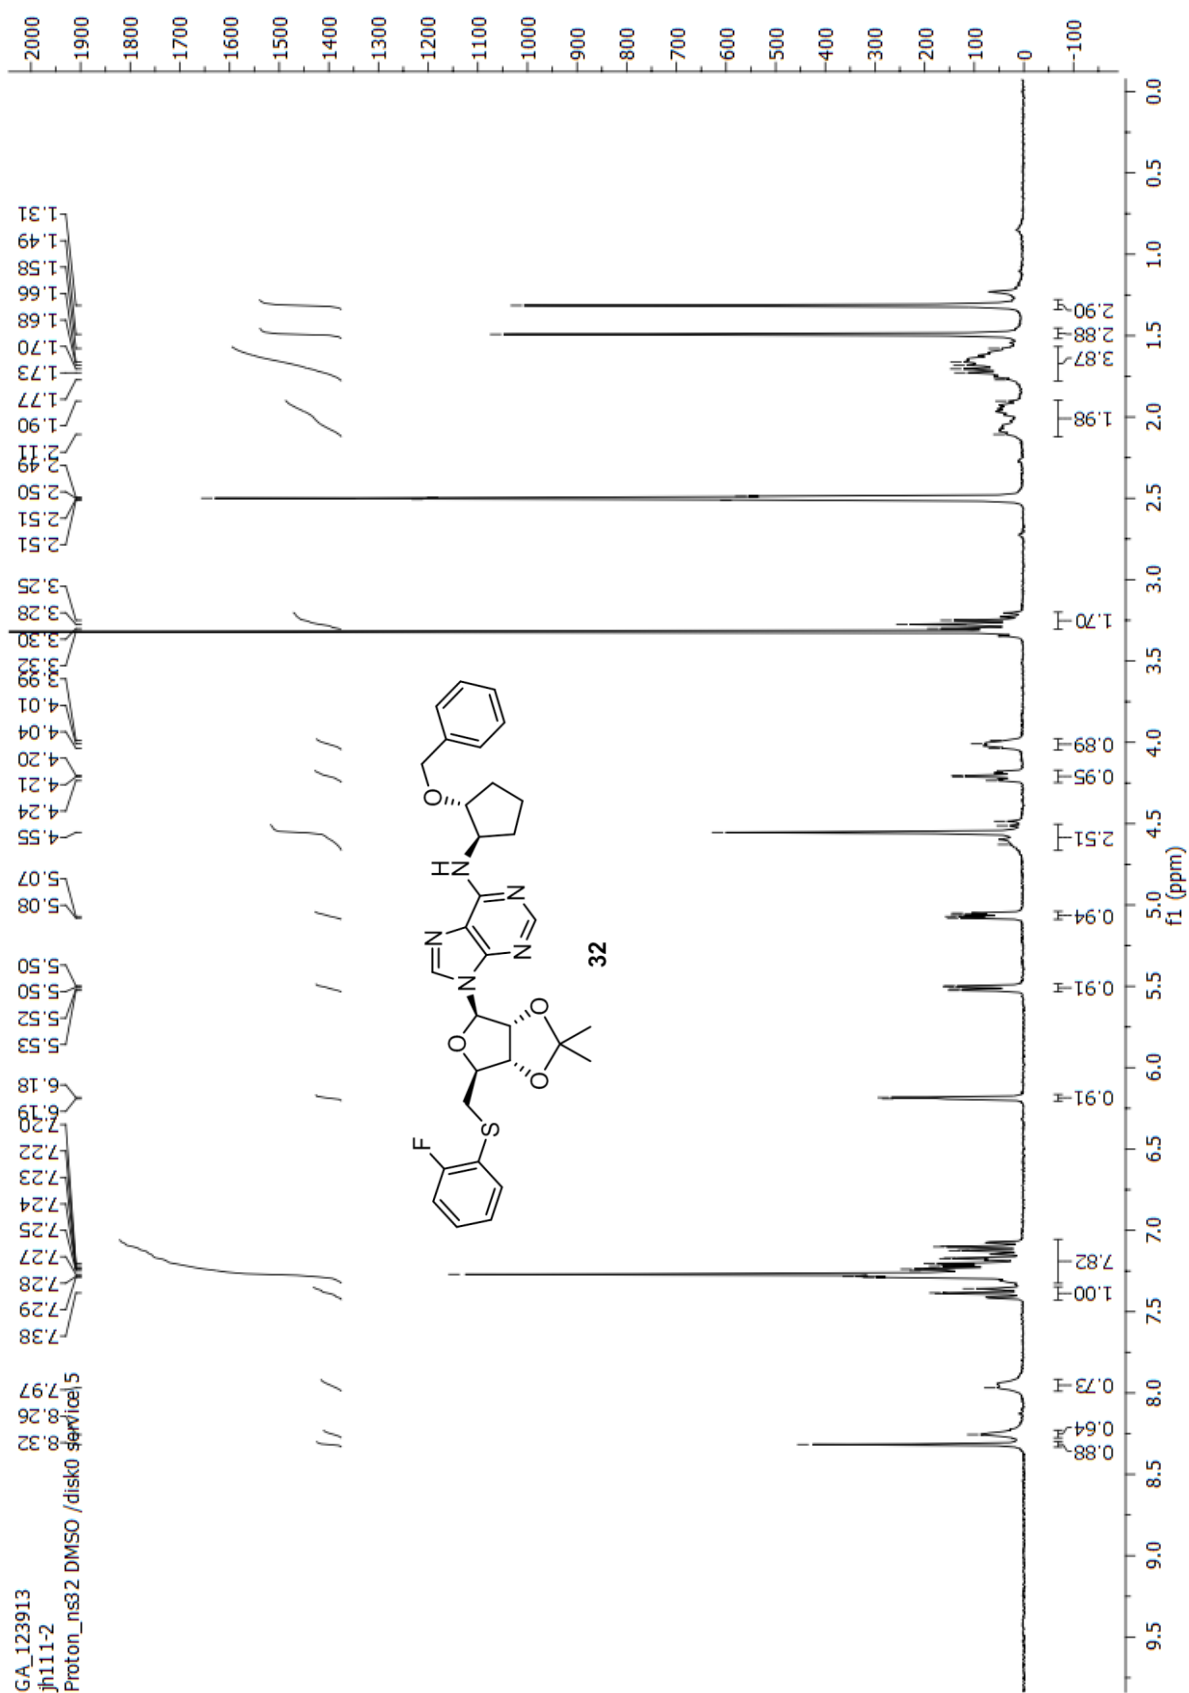



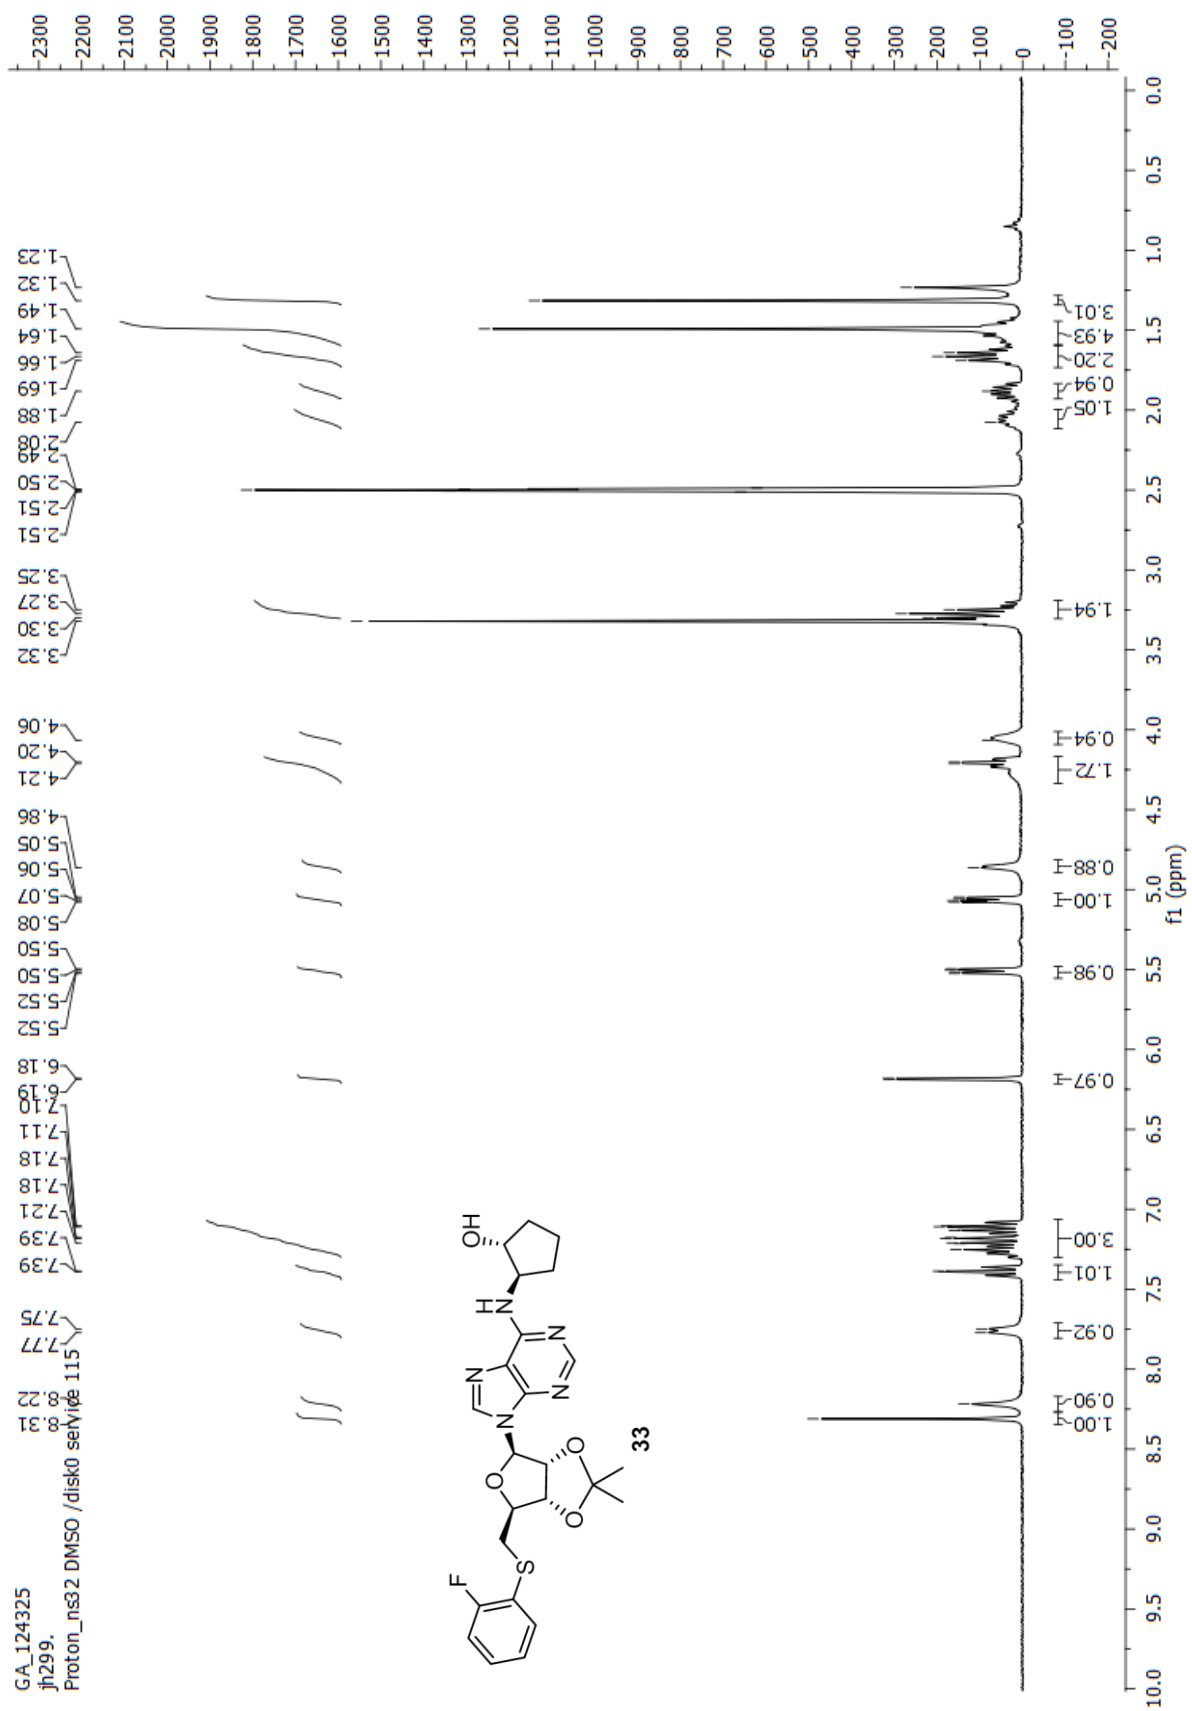

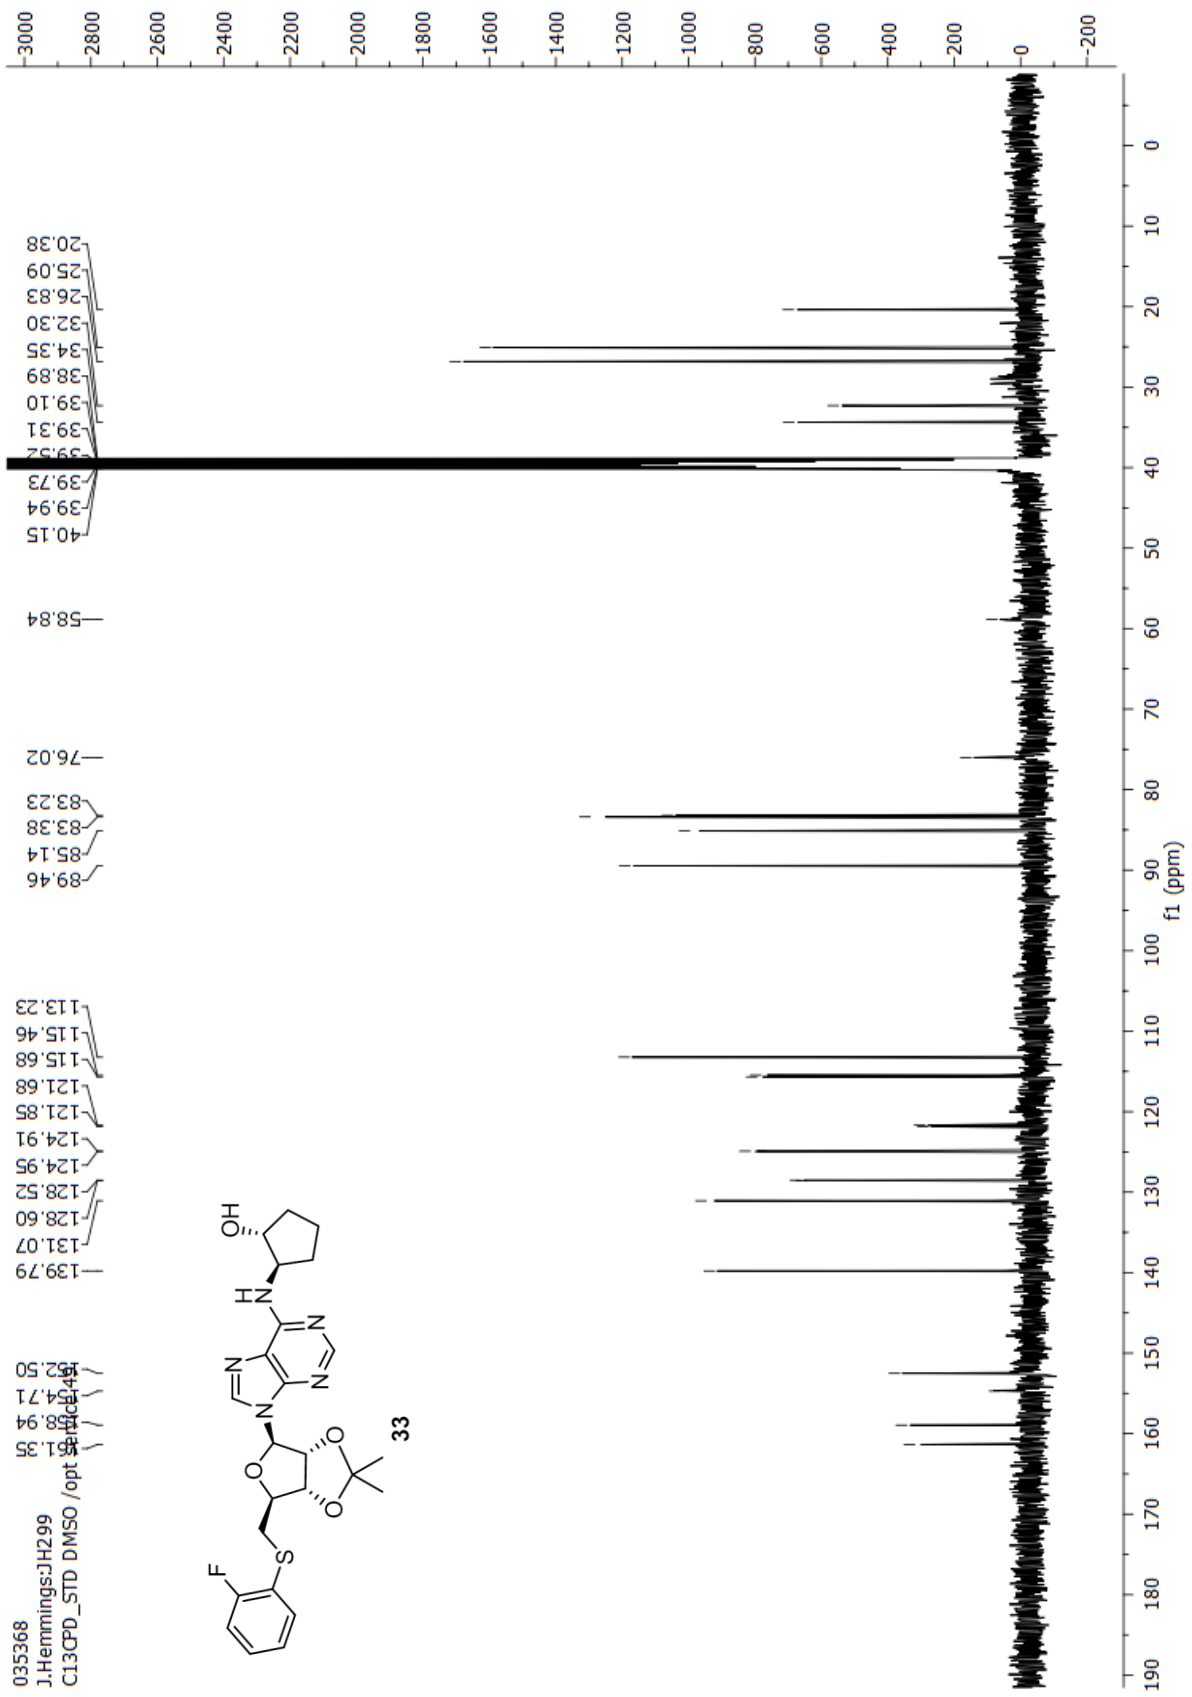

035368  
J.Hemmings:JH299  
C13CPD\_STD DMSO /opt

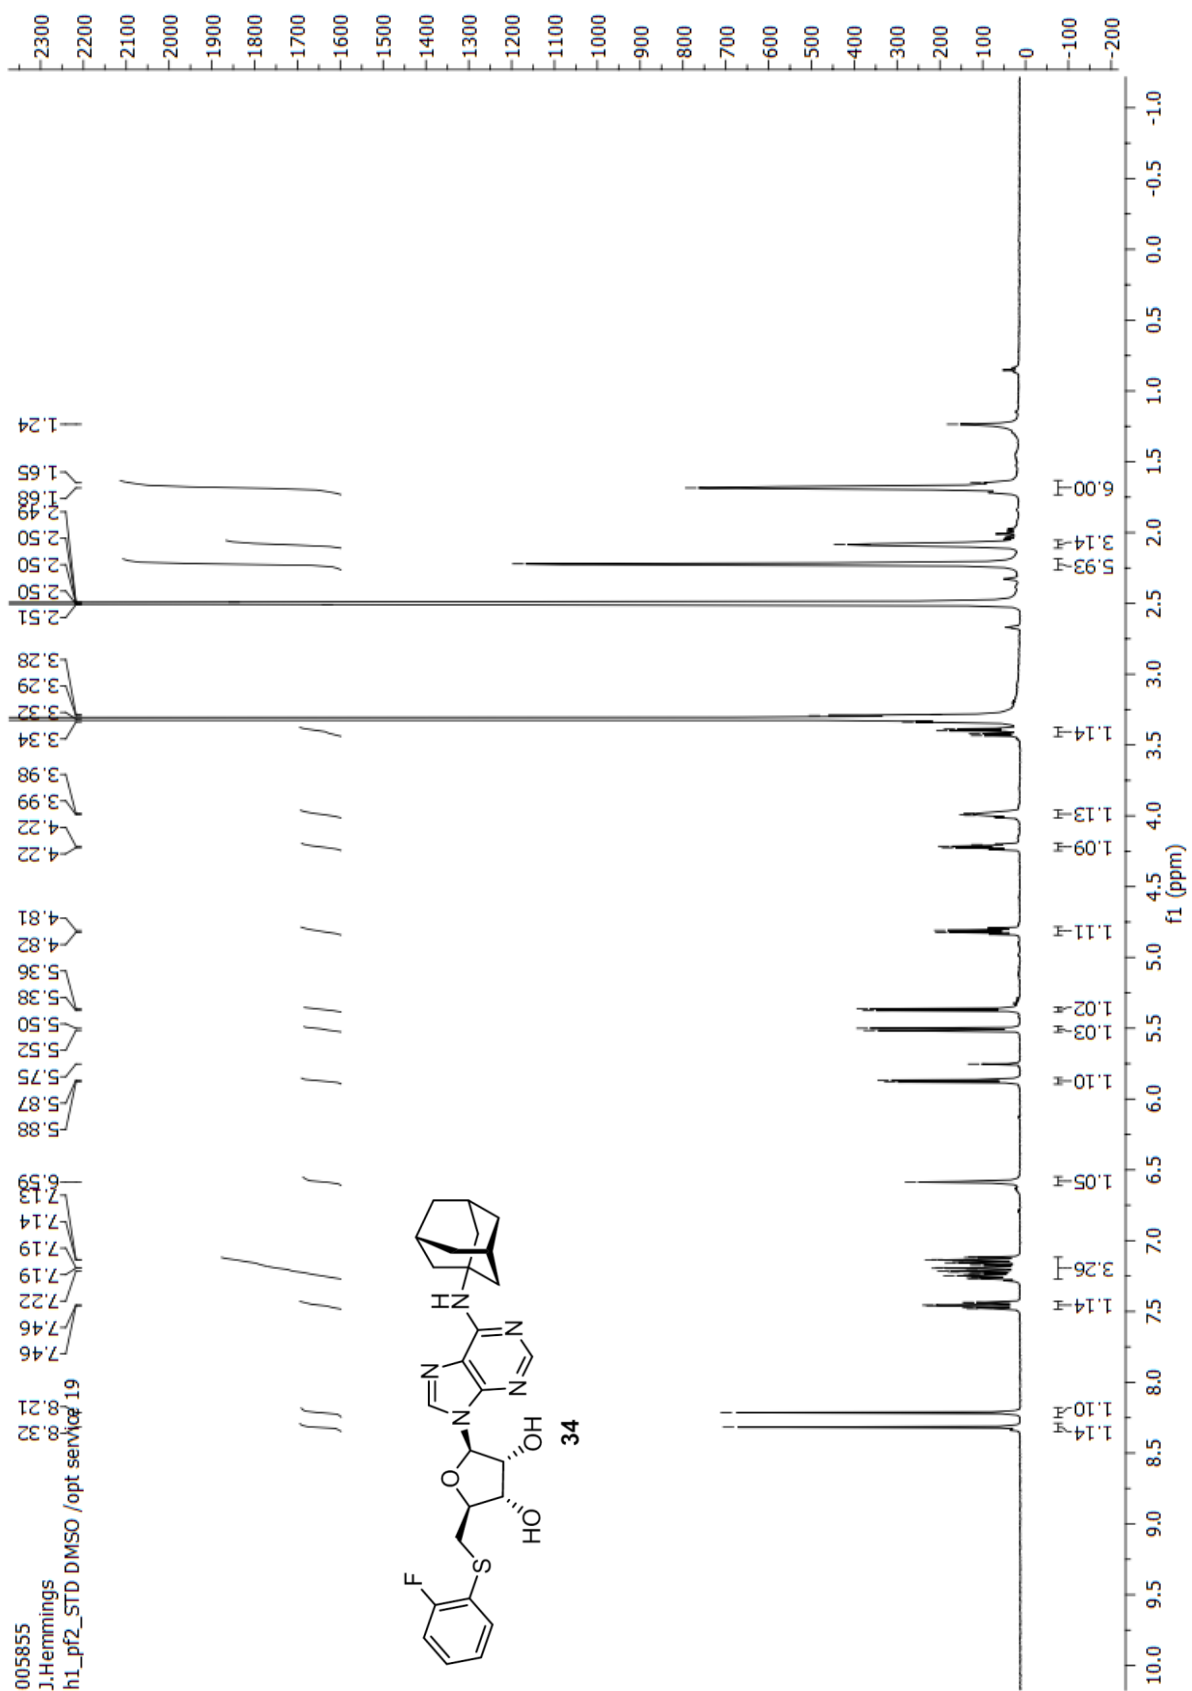



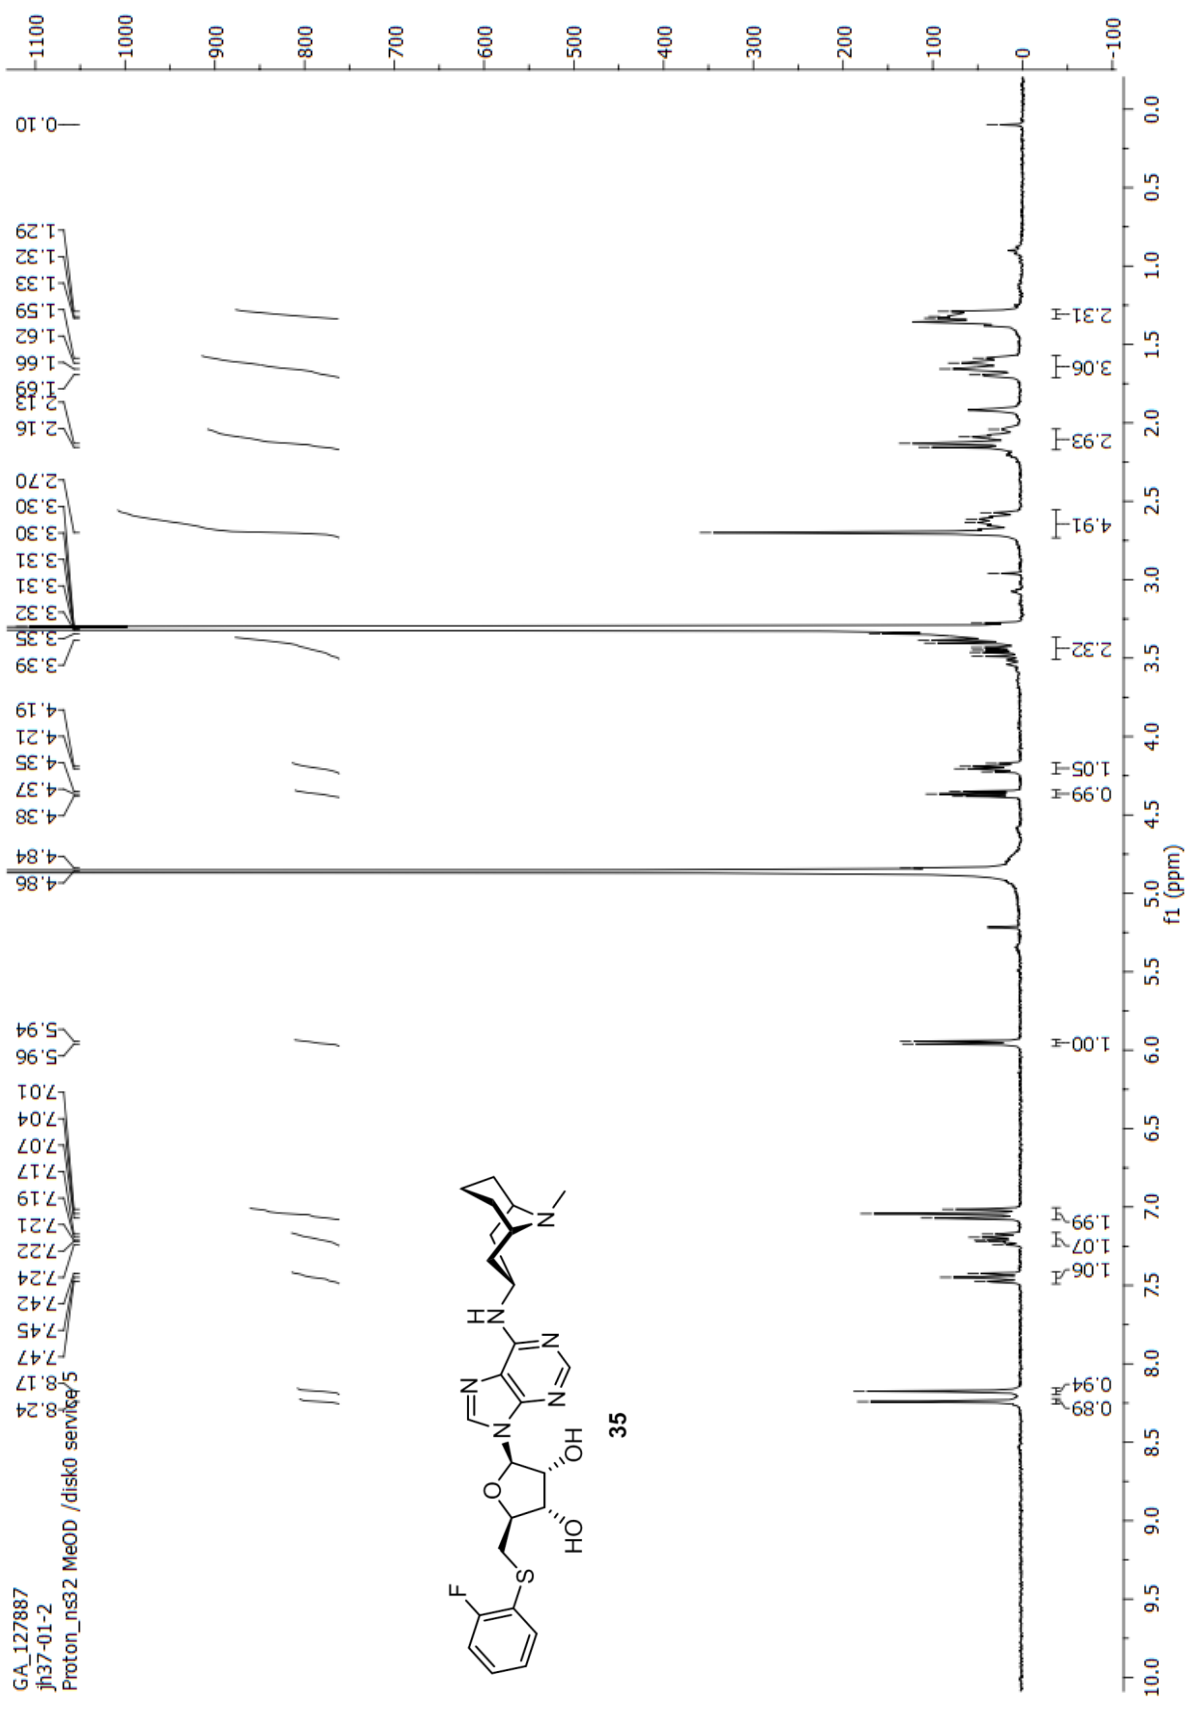



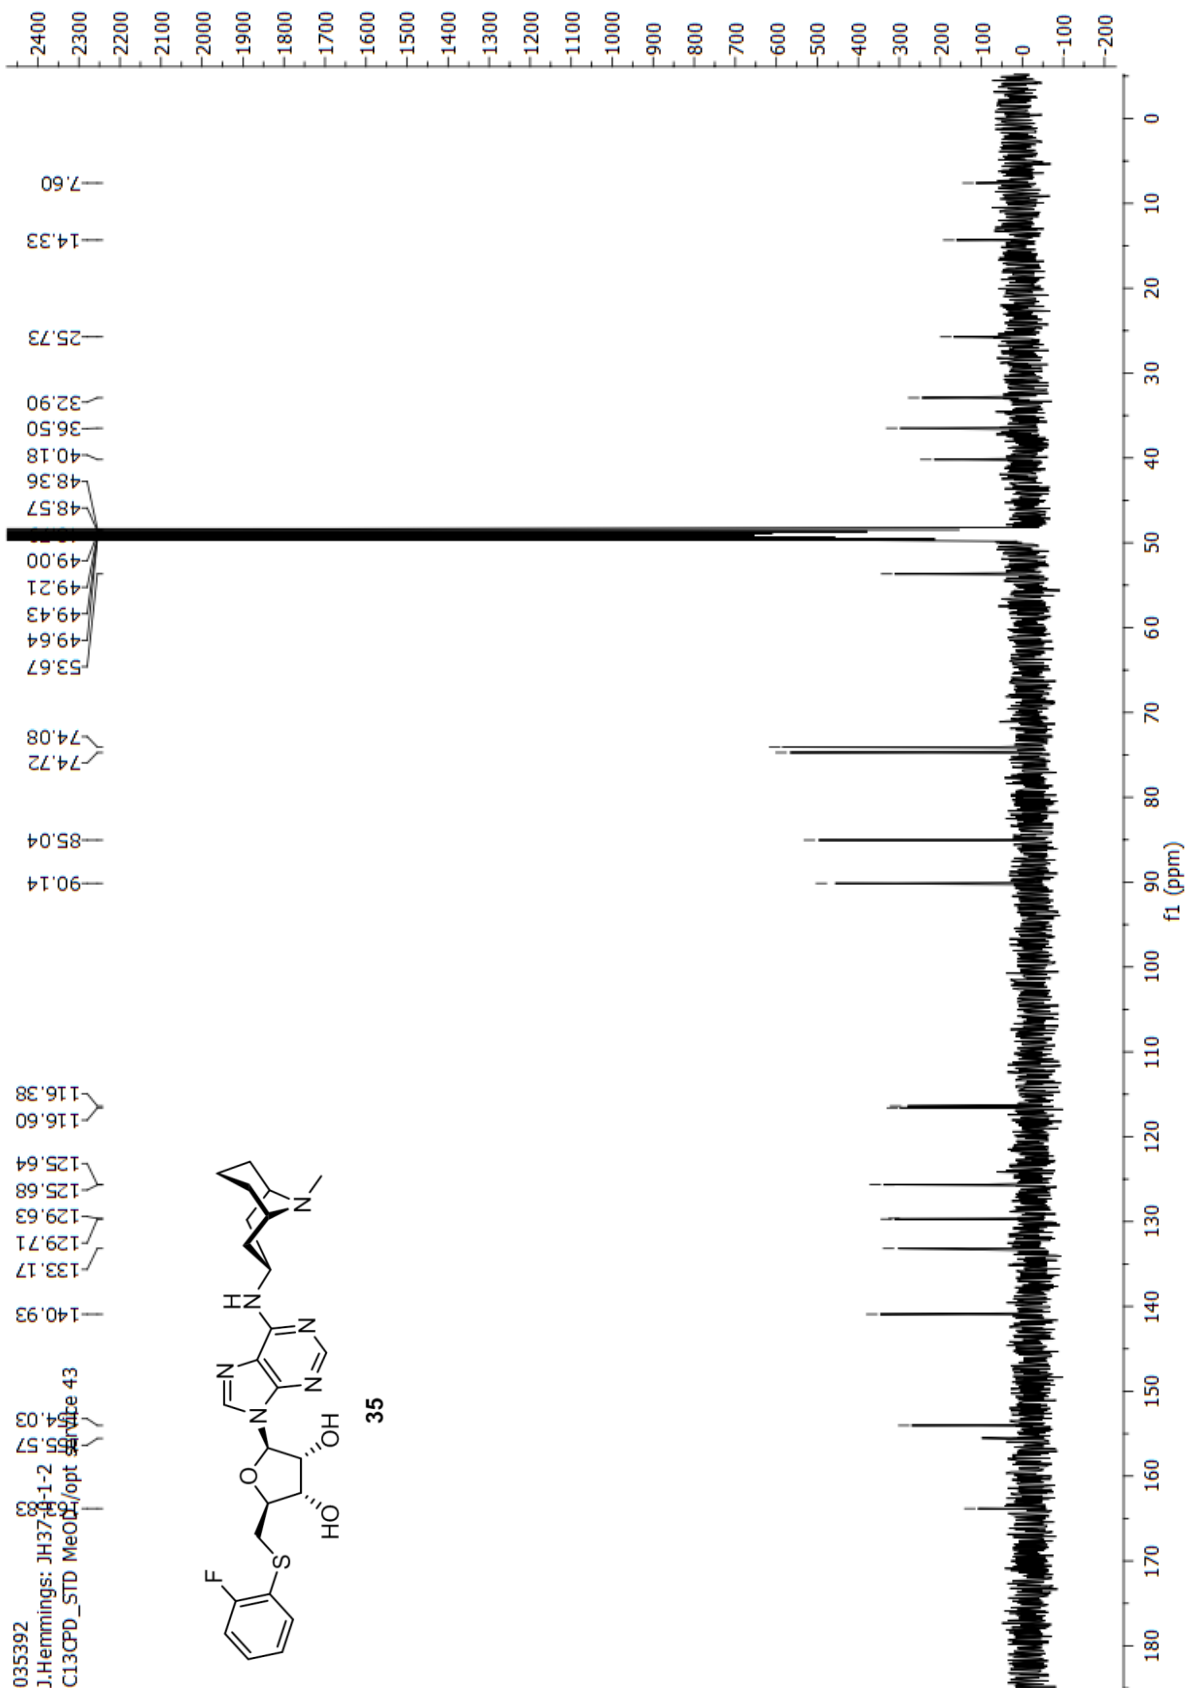

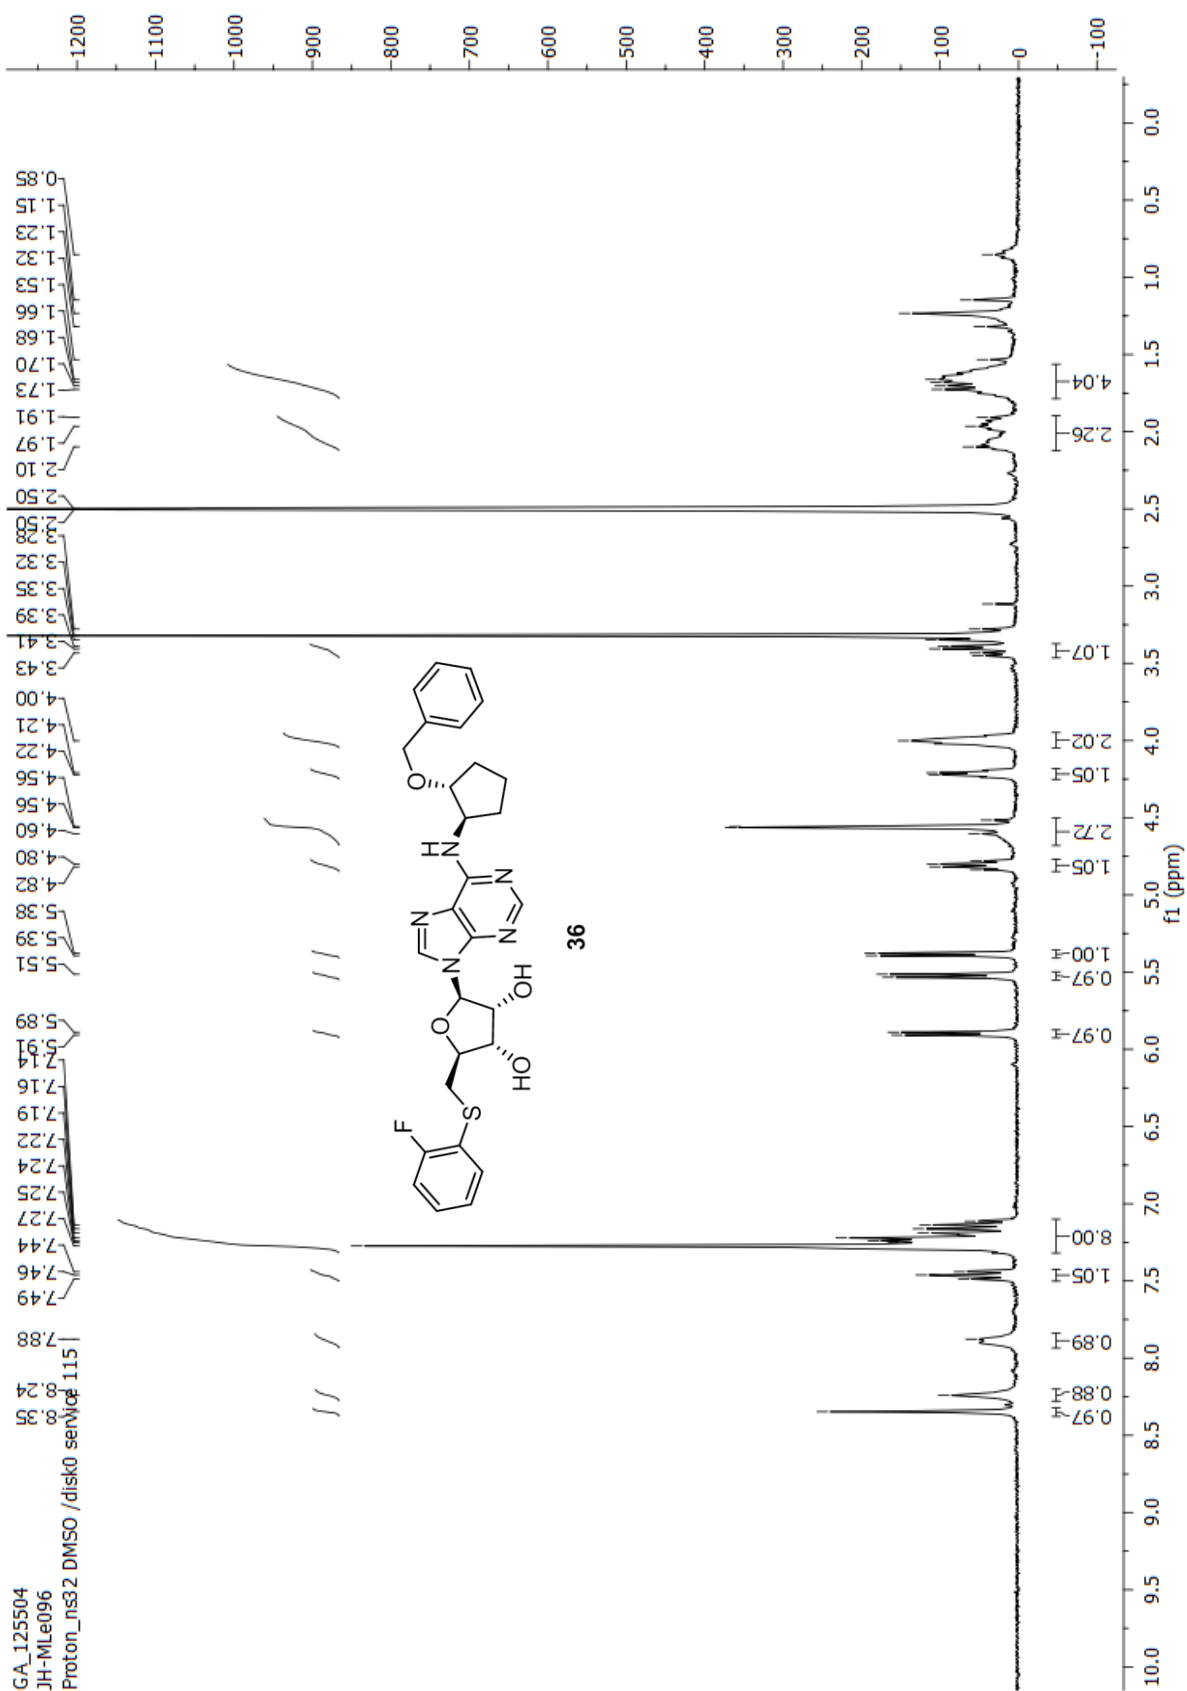

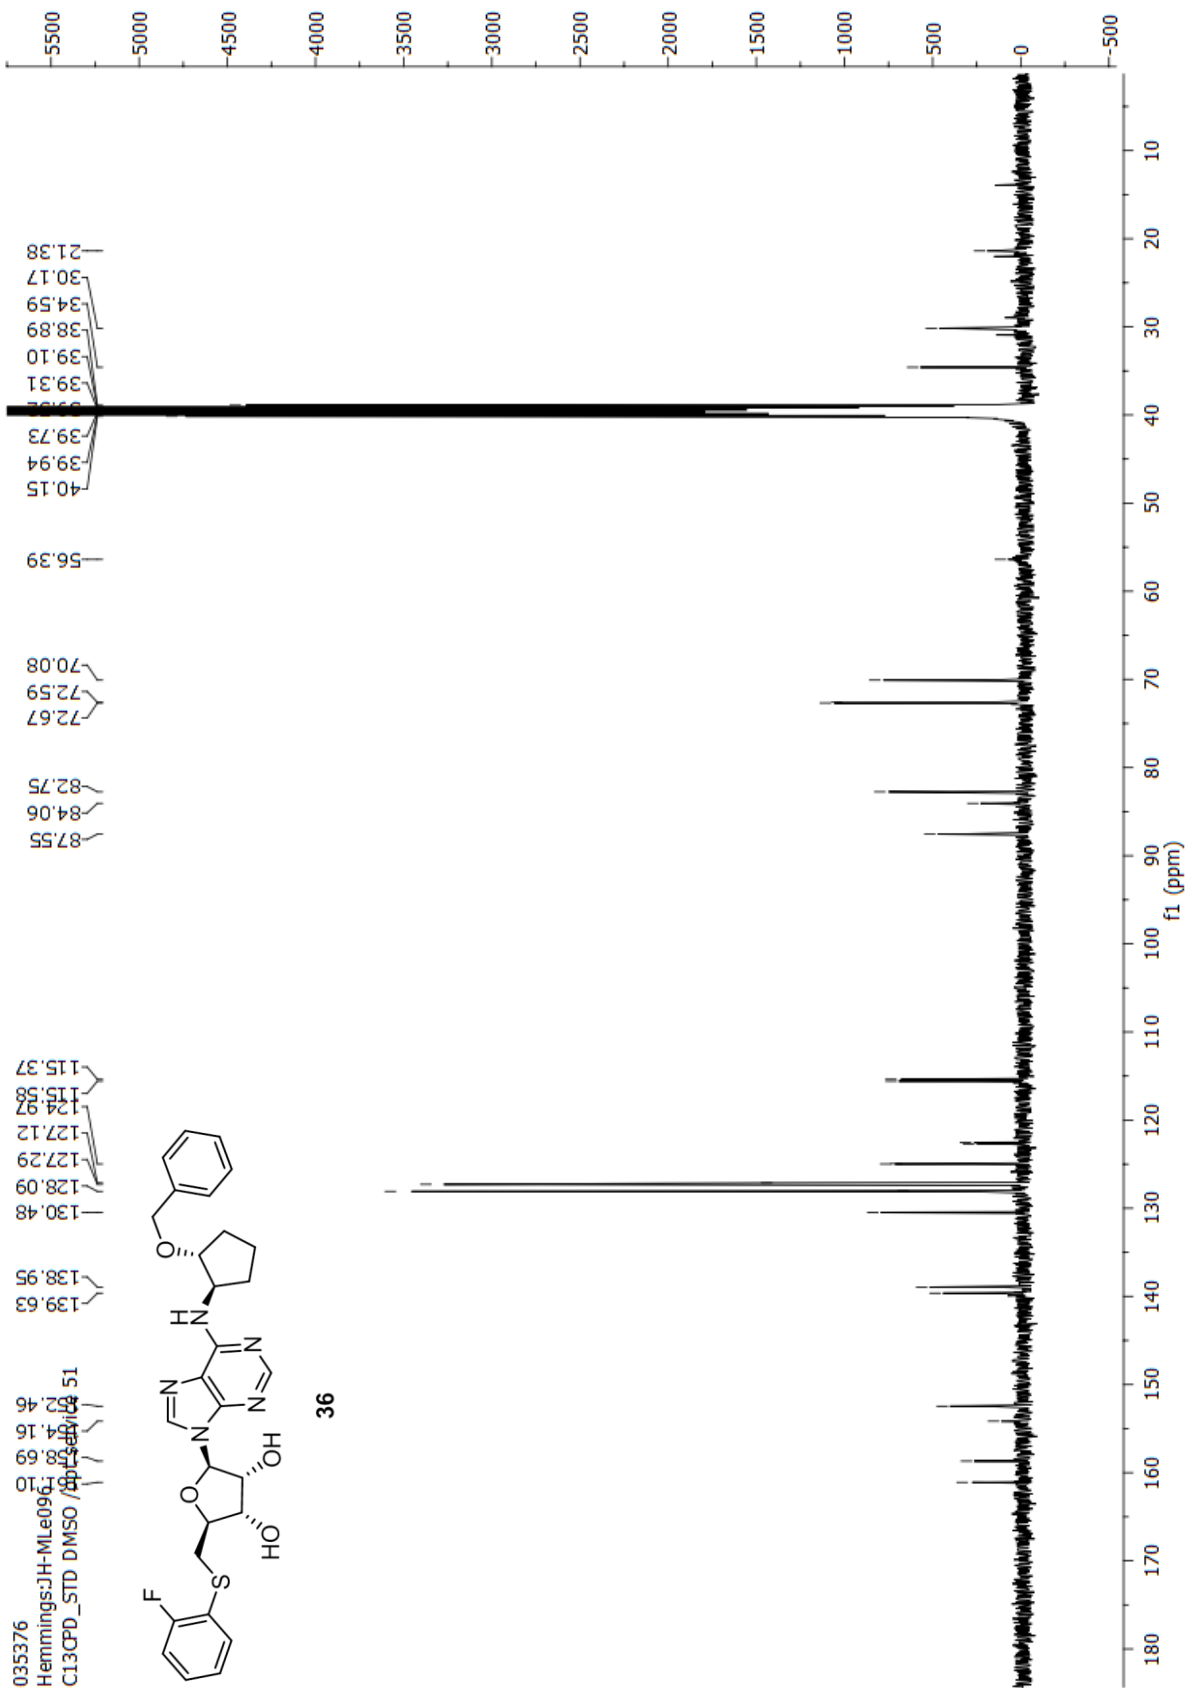

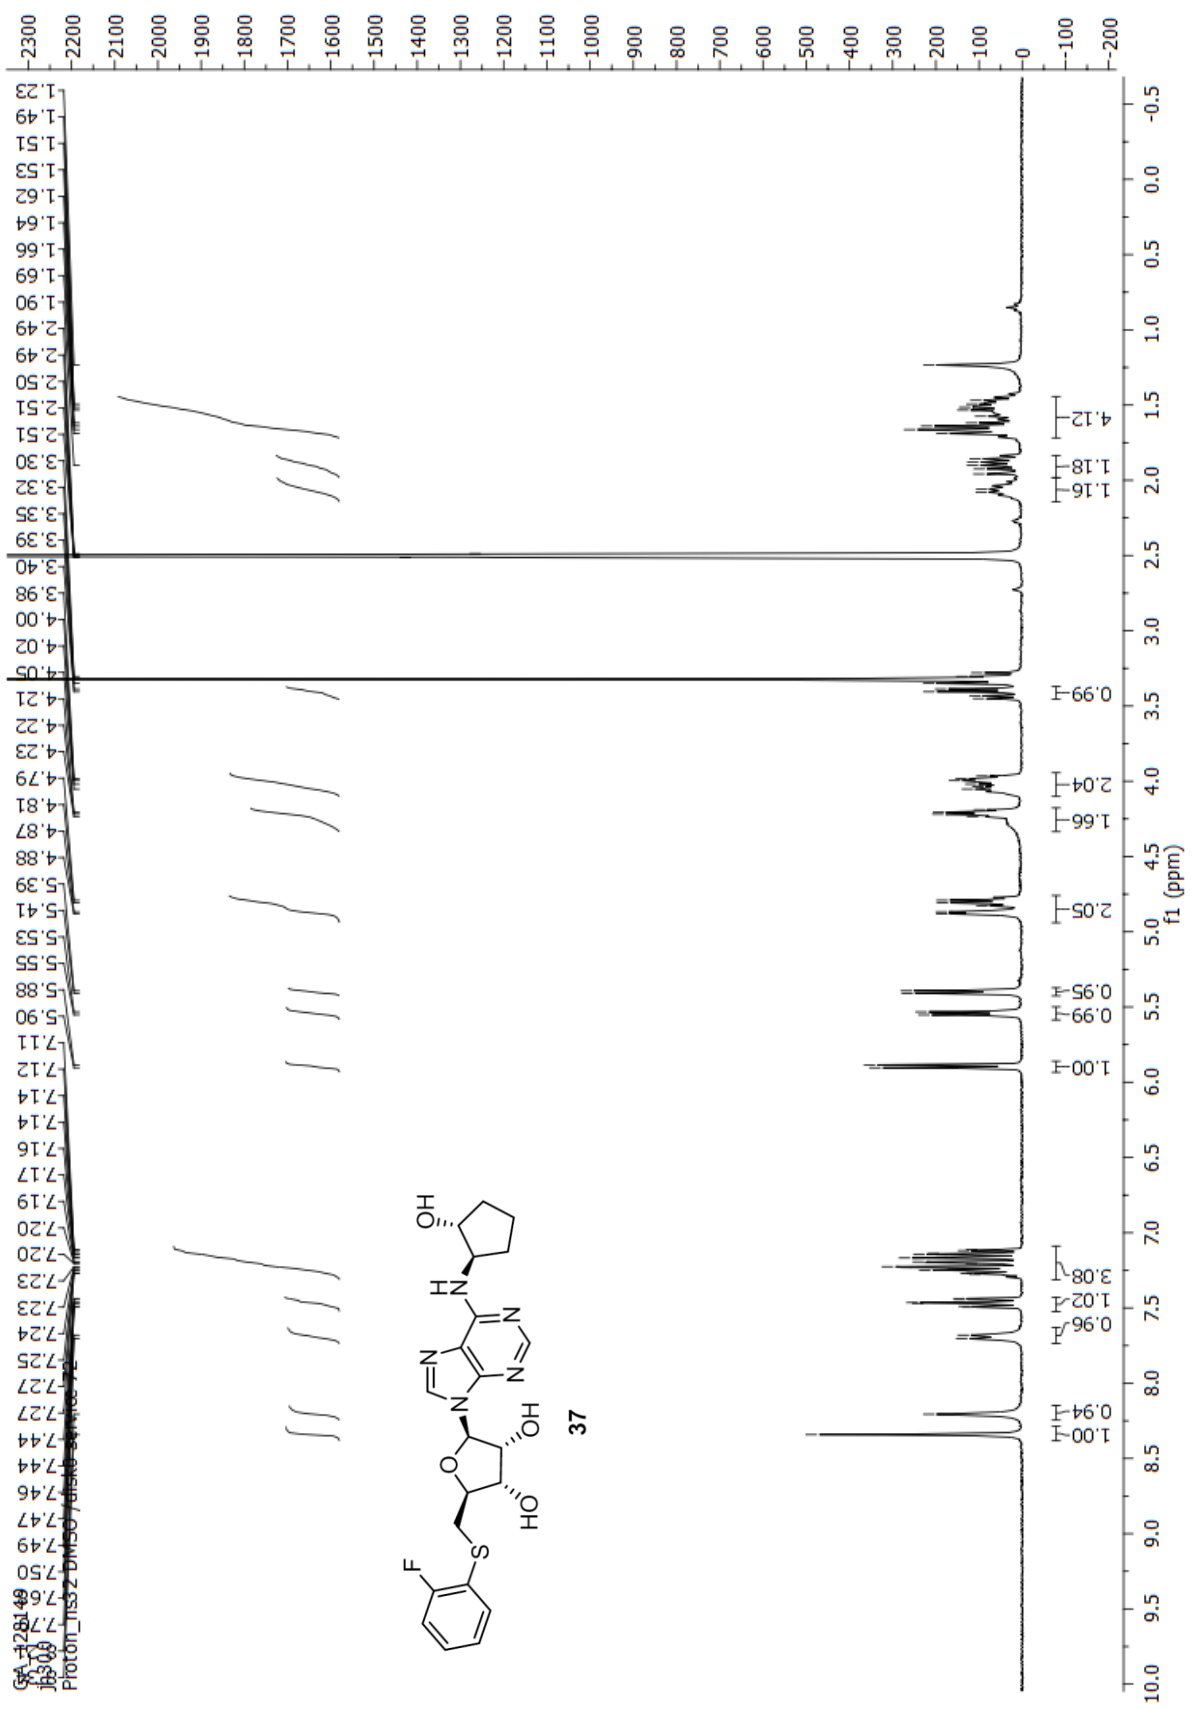

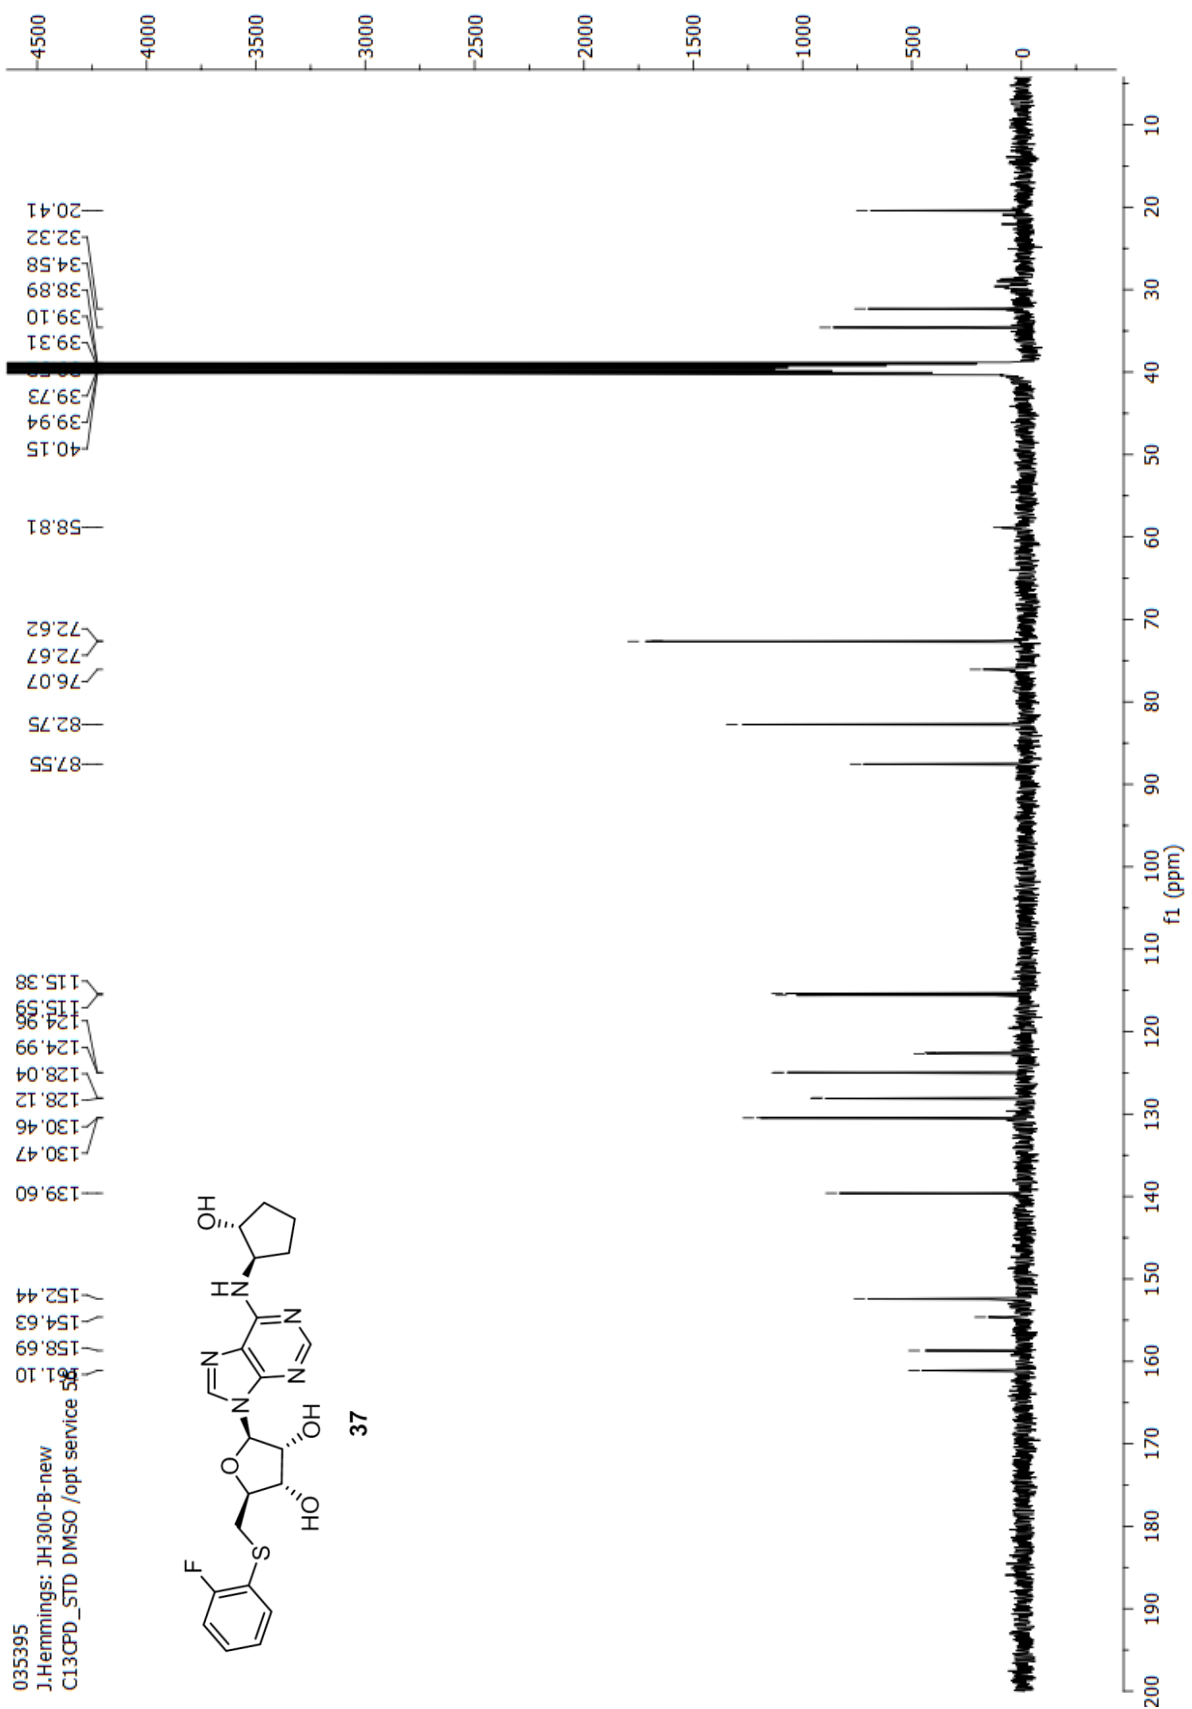

### III. Degree of purity for tested compounds

**Table S1.** Degree of purity for tested compounds.

| Compound Number | Purity (%)     | t <sub>R</sub> (min) |
|-----------------|----------------|----------------------|
| <b>5</b>        | 99             | 2.66                 |
| <b>6</b>        | 98             | 2.30                 |
| <b>7</b>        | 99             | 1.46                 |
| <b>9</b>        | 99             | 1.41                 |
| <b>16</b>       | 99             | 3.06                 |
| <b>17</b>       | 94             | 2.18                 |
| <b>18</b>       | 99             | 2.69                 |
| <b>19</b>       | 99             | 1.62                 |
| <b>20</b>       | 98             | 2.59                 |
| <b>21</b>       | 99             | 2.21                 |
| <b>24</b>       | 99             | 1.80                 |
| <b>25</b>       | 99             | 1.87                 |
| <b>34</b>       | - <sup>a</sup> | - <sup>a</sup>       |
| <b>35</b>       | 99             | 2.24                 |
| <b>36</b>       | 99             | 3.14                 |
| <b>37</b>       | 95             | 2.35                 |

<sup>a</sup> HPLC chromatogram could not be obtained. **34** is  $\geq 95\%$  pure according to <sup>1</sup>H, <sup>13</sup>C, <sup>19</sup>F NMR and HRMS ( $\Delta = 0.8$  ppm).

#### IV. A<sub>3</sub>R in yeast

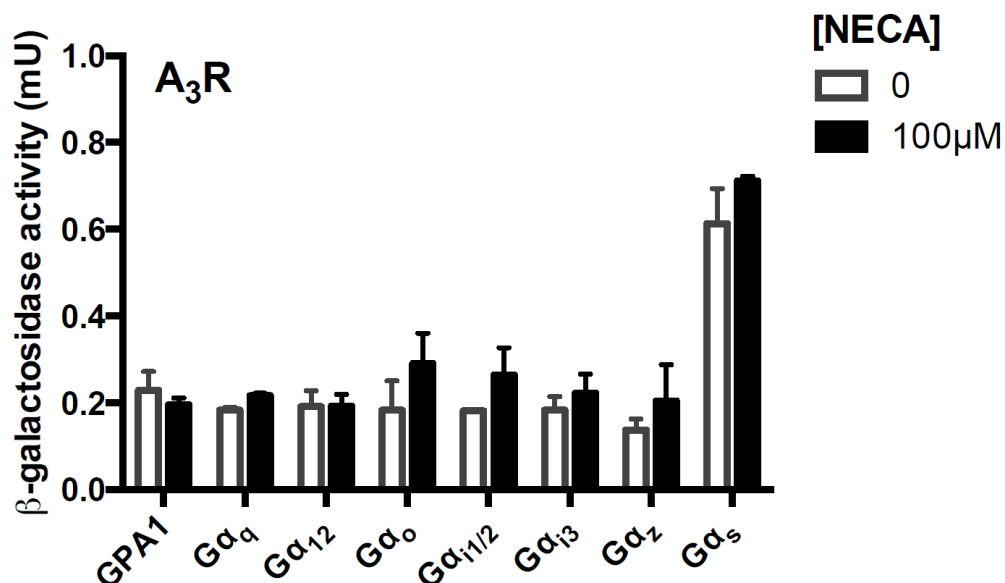

**Figure S1.** Non-functional coupling of the A<sub>3</sub>R in yeast. Yeast strains expressing the human A<sub>3</sub>R were stimulated with 0 or 100 μM NECA for 16 h and assayed for the activation of the *FUS1* > *lacZ* reporter gene as previously described.<sup>15-17,19</sup> β-galactosidase units (mU) are expressed as the ratio of *o*-nitrophenol product to cell density (determined colorimetrically; see *Experimental Section*). Data are mean of 5 independent experiments ± SEM.

# V. Schild plot analysis for compounds 36 and 37

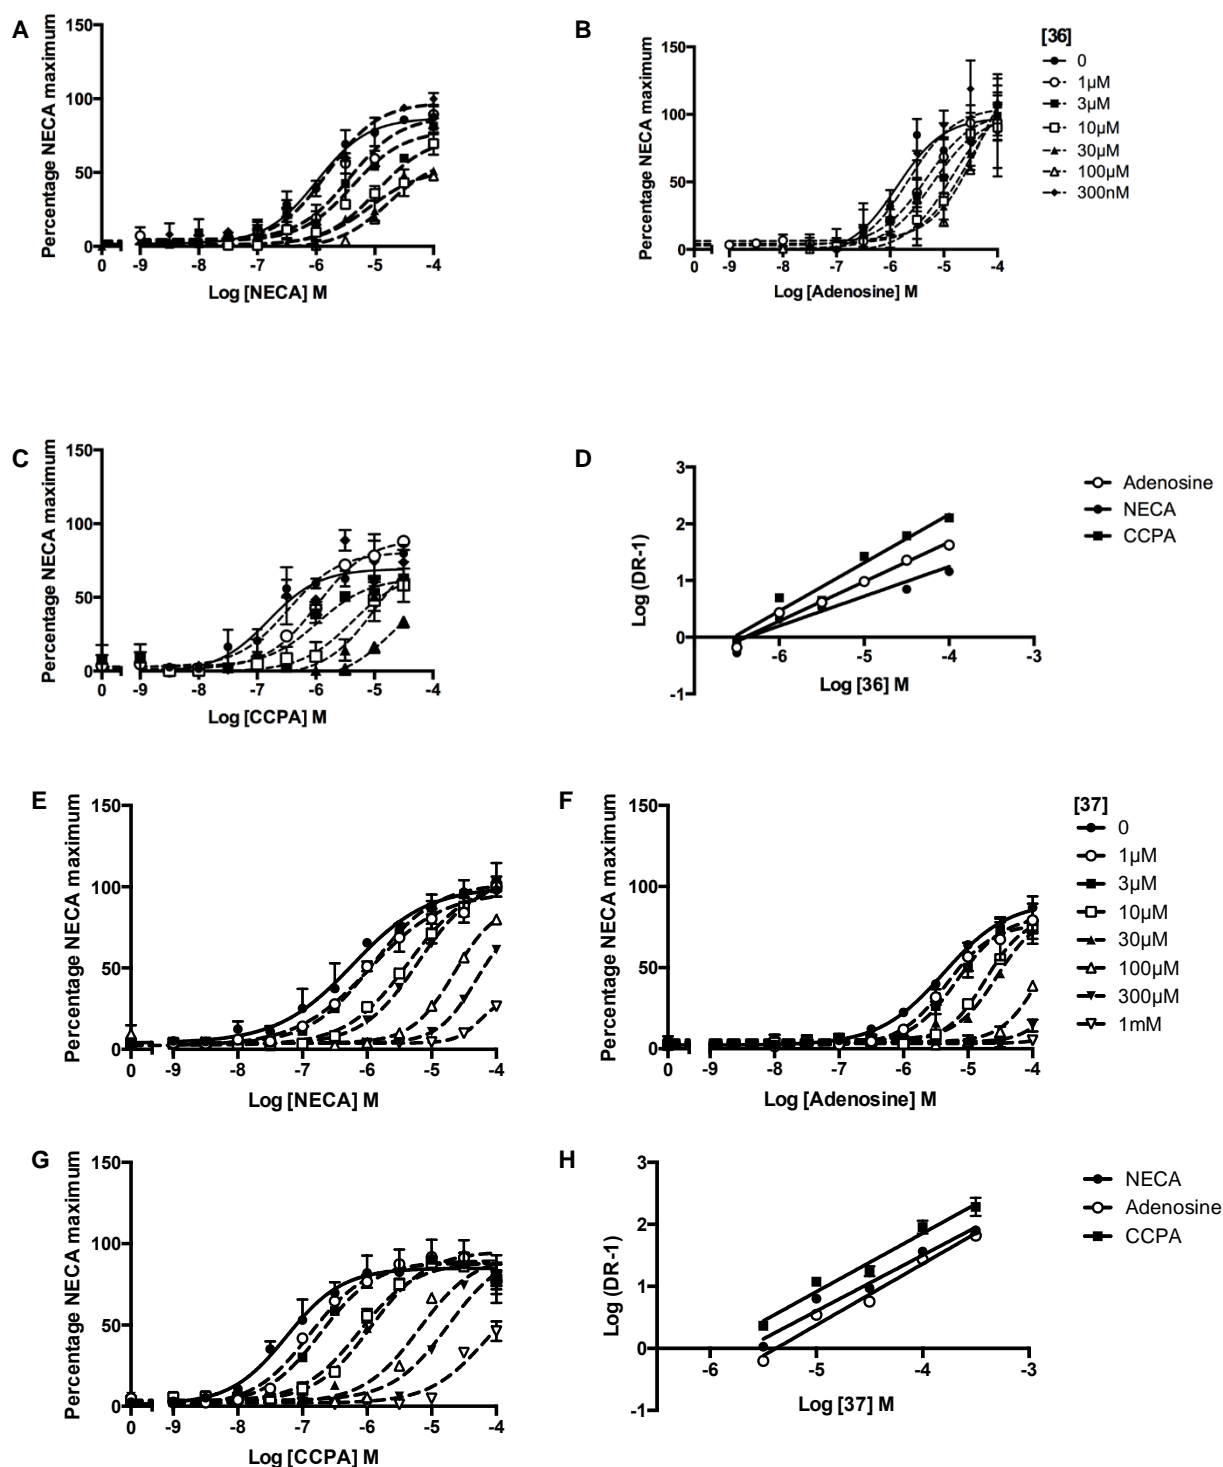

**Figure S2.**  $N^6$ -cyclopentyl congeners **36** and **37** (CVT-3619) are competitive antagonists of the  $A_1R$ . Yeast cells expressing the human  $A_1R$  were stimulated for 16 h with (A, E) NECA, (B, F) adenosine, (C, G) CCPA in the presence of the indicated concentrations of **36** (A-C) or **37** (E-G) and the extent of signaling quantified through activation of the *FUS1-lacZ* reporter gene. Data are expressed as the percentage of the maximum response achieved when cells were stimulated in the absence of **36** or **37** and are mean of 5 independent experiments  $\pm$  SEM. (D, H) Schild regression lines obtained from the data in A-C (**36**) and E-G (**37**), respectively. In the double logarithmic plot, the DR-1 of each ligand was calculated from the data in A-C and E-G, respectively.



# VI. Predicted binding poses for compounds 5-7, 17-21 and 34

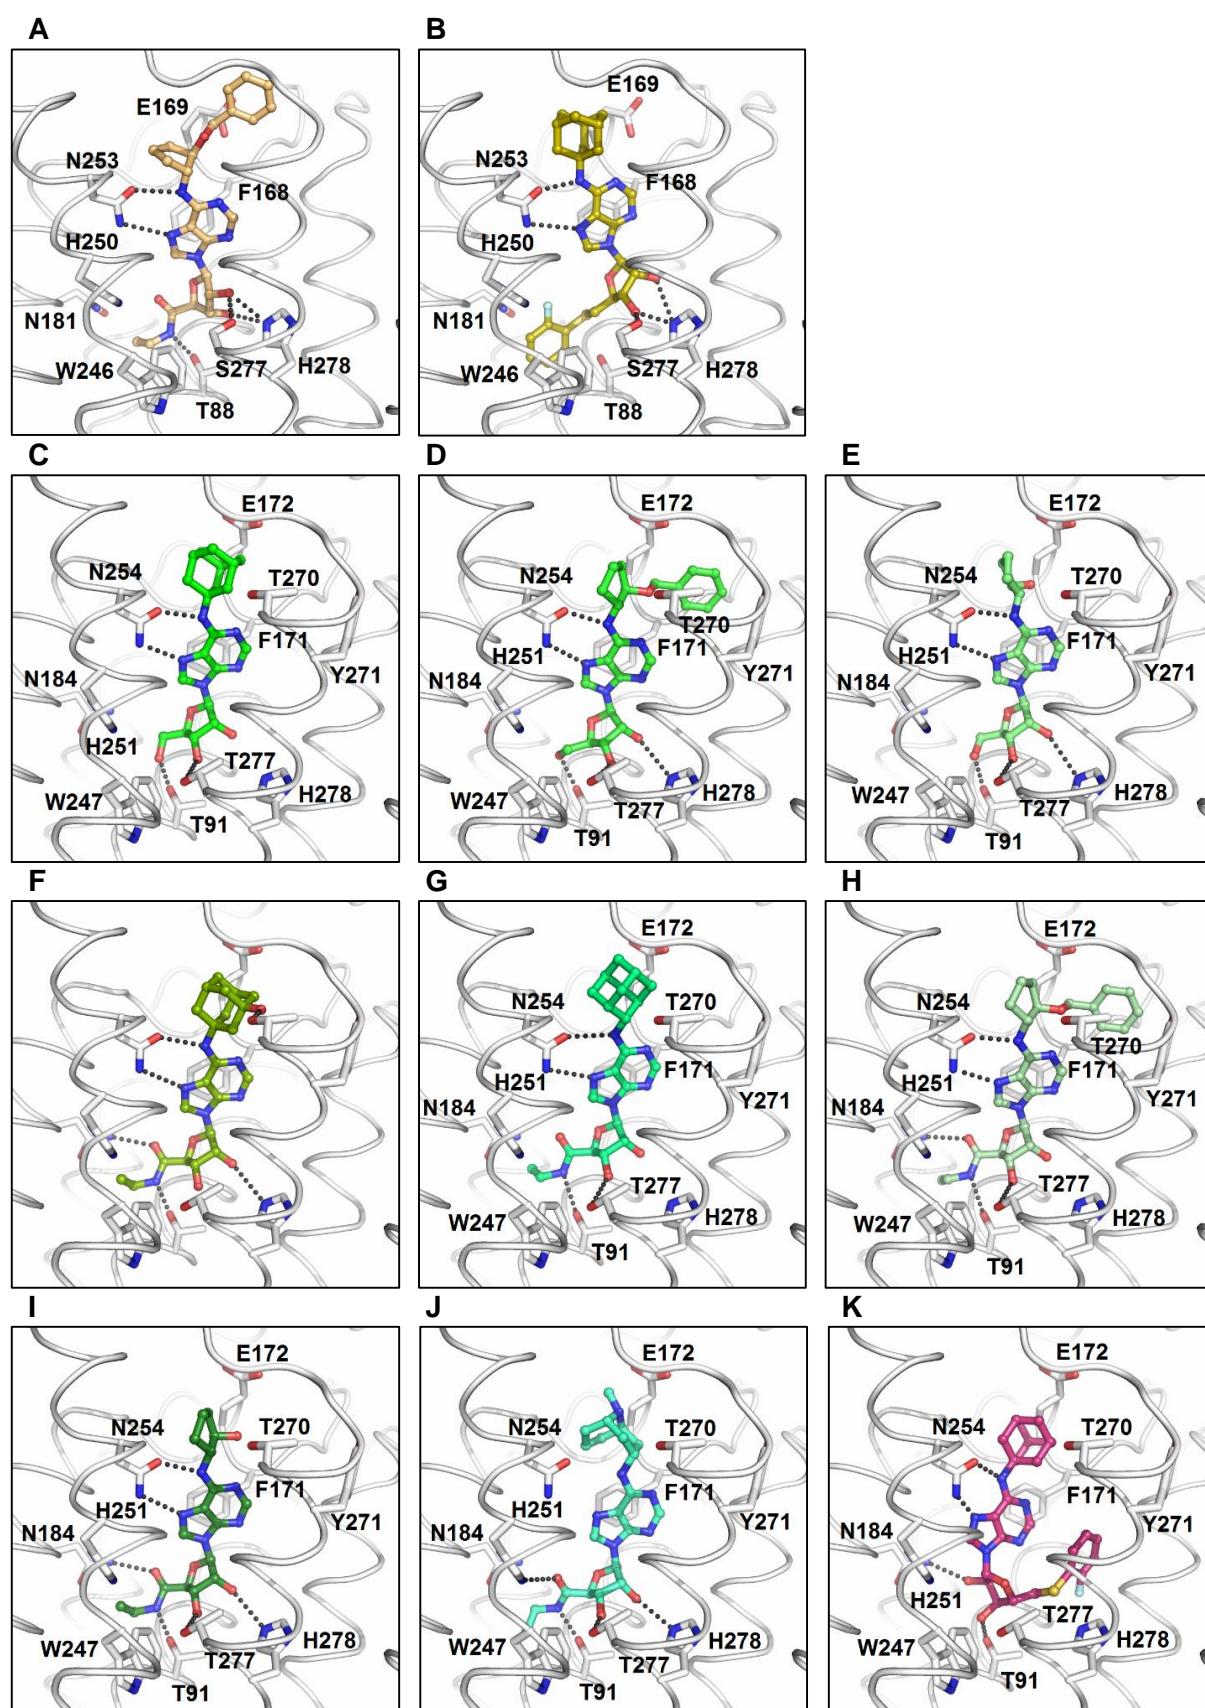

**Figure S3.** (left) Docking of  $N^6$ -substituted adenosine derivatives into the  $A_{2A}R$  crystal structure (A,B) and into the  $A_1R$  homology model (C-K). Proposed binding poses for (A) **20** and (B) **34** in the  $A_{2A}R$  crystal structure. Proposed binding poses for (C) **5**, (D) **6**, (E) **7**, (F) **17**, (G) **18**, (H) **20**, (I) **21**, (J) **19** and (K) **34** in the  $A_1R$  homology model. Black dotted lines represent potential hydrogen bonds. Compounds docked into  $A_{2A}R$  crystal structure in brown shades, compounds that showed agonist activity at the  $A_1R$  (Table 1) are in green shades, compounds which exhibited activation at very high concentration in blue shade and compounds that failed to active the  $A_1R$  are shown in red shade. Numbering of residues in (A,B) according to P29274 ( $hA_{2A}R$ ) and of homologous residues in (C-K) according to P30542 ( $hA_1R$ ). Ballesteros-Weinstein (BW) numbering: T88 ( $A_{2A}$ ), T91 ( $A_1$ ): BW 3.36; F168 ( $A_{2A}$ ), F171 ( $A_1$ ): BW ECL2; E169 ( $A_{2A}$ ), E172 ( $A_1$ ): BW ECL2; N181 ( $A_{2A}$ ), N184 ( $A_1$ ): BW 5.42; W246 ( $A_{2A}$ ), W247 ( $A_1$ ): BW 6.48; H250 ( $A_{2A}$ ), H251 ( $A_1$ ): BW 6.52; N253 ( $A_{2A}$ ), N254 ( $A_1$ ): BW 6.55; T270 ( $A_1$ ): BW 7.35; Y271 ( $A_{2A}$ ), Y271 ( $A_1$ ): BW 7.36; S277 ( $A_{2A}$ ), T277 ( $A_1$ ): BW 7.42; H278 ( $A_{2A}$ ), H278 ( $A_1$ ): BW 7.43.

## VII. PSI-Coffee sequence alignment for $A_1R$ homology modelling

|      |     |                                                                                         |     |
|------|-----|-----------------------------------------------------------------------------------------|-----|
| 3QAK | 3   | IMGSSVYITVELAIAVLAILGNVLVCWAVWLNSNLQNVNTNYFVVSLLAAADIAVGVLAI                            | 62  |
| hA1R | 9   | ---QAAYIGIEVLIALVSVPGNVLVIWAVKVNQALRDATFCFIVSLAVADVAVGALVIPL                            | 65  |
|      |     | * * * * *      * * * * *                                                                |     |
| 3QAK | 63  | AITISTGFCAACHGCLFIACFVLVL <b>TQSSIF</b> SLLAIAIDRYIAIRIPLRYNGLVTGTRAK                   | 122 |
| hA1R | 66  | AILINIGPQTYFHTCLMVACPVLIL <b>TQSSIL</b> ALLAIAVDRLRVKIPLRYKMVVTERRAA                    | 125 |
|      |     | * * * * *      * * * * *      * * * * *      * * * * *                                  |     |
| 3QAK | 123 | GIIAICWVLSFAIGLTPMLGWNNCGQ-----GCGEGQVACL <b>FED</b> VVPMNYMVY <b>FNE</b>               | 182 |
| hA1R | 126 | VAIAGCWILSFVVGTLTPMFGWNNLSAVERAWAANGSMGEPVIKCE <b>FEK</b> VISM EYMVY <b>FNE</b>         | 185 |
|      |     | * * * * *      * * * * *      * * * * *      * * * * *                                  |     |
| 3QAK | 183 | FACVLVPLLLMLGVYLRIFLAARRQL-----RSTLQKEVHAAKSLAIIVGLFAL                                  | 244 |
| hA1R | 186 | FVWVLPPLLLMVLIYLEVFYLIRKQLNKKVSASSGDPQKYKGKELKIAKSLALILFAL                              | 245 |
|      |     | * * * * *      * * * * *      * * * * *      * * * * *                                  |     |
| 3QAK | 245 | CWLPLHI <b>INC</b> FTFFCPDCSHAPLWL <b>MY</b> LAIVL <b>SH</b> TNSVVPFIYAYRIREFRQTFRKIIR  | 304 |
| hA1R | 246 | SWLPLHIL <b>NC</b> ITLFCPSC-HKPSIL <b>TY</b> IAIFL <b>TH</b> GNSAMNPVYAFRIQKFRVTFELKIW- | 303 |
|      |     | * * * * *      * * * * *      * * * * *      * * * * *                                  |     |

**Figure S4.** PSI-Coffee sequence alignment used for the construction of the human adenosine  $A_1R$  homology model. 3QAK: sequence of the human  $A_{2A}R$  (accession no. P29274) from the agonist-bound crystal structure (PDB ID: 3QAK). hA1R: sequence of human  $A_1R$  (accession no. P30542). Identical residues are marked with an asterisk and highlighted with a grey background. Residues in bold are involved in ligand binding and discussed in the docking section (Figure 6).

## VIII. Supplementary references

(S1) Slavik, R.; Herde, A. M.; Bieri, D.; Weber, M.; Schibli, R.; Krämer, S. D.; Ametamey, S. M.; Mu, L. Synthesis, radiolabeling and evaluation of novel 4-oxo quinoline derivatives as PET tracers for imaging cannabinoid type 2 receptor. *Eur. J. Med. Chem.* **2015**, 92, 554-564.

(S2) Qiao, J. X.; Chang, C-H; Cheney, D. L.; Morin, P. E.; Wang, G. Z.; King, S. R.; Wang, T. C.; Rendina, A. R.; Luetttgen, J. M.; Knabb, R. M.; Wexler, R. R.; Lam, P. Y. S. SAR and X-ray structures of enantiopure 1,2-*cis*-(1*R*,2*S*)-cyclopentylidiamine and cyclohexylidiamine derivatives as inhibitors of coagulation Factor Xa. *Bioorg. Med. Chem. Lett.* **2007**, 17, 4419-4427.

(S3) Friedrich, S. R.; Qiao, J. X.; Pinto, D. J.; Orwat, M. J.; Han, W. 1,1-Disubstituted cycloalkyl derivatives as factor Xa inhibitors. WO2003/99276 A1, **2003**.

(S4) Rouf, A.; Gupta, P.; Aga, M. A.; Kumar, B.; Parshad, R.; Taneja, S. C. *Tetrahedron Asymmetry* **2011**, 22, 2134-2143.
